1 **The rate and effect of *de novo* mutations in natural populations**  
2 **of *Arabidopsis thaliana***

3 Moises Exposito-Alonso<sup>1,2†</sup>, Claude Becker<sup>1†</sup>, Verena J. Schuenemann<sup>3,4</sup>, Ella Reitter<sup>3</sup>, Claudia Setzer<sup>5</sup>,  
4 Radka Slovak<sup>5</sup>, Benjamin Brachi<sup>6§</sup>, Jörg Hagmann<sup>1§</sup>, Dominik G. Grimm<sup>1§</sup>, Chen Jiahui<sup>6,7</sup>, Wolfgang Busch<sup>5</sup>,  
5 Joy Bergelson<sup>6</sup>, Rob W. Ness<sup>8</sup>, Johannes Krause<sup>3,4,9</sup>, Hernán A. Burbano<sup>2,\*</sup>, Detlef Weigel<sup>1,\*</sup>.

6 <sup>1</sup>Department of Molecular Biology, Max Planck Institute for Developmental Biology, 72076 Tübingen,  
7 Germany

8 <sup>2</sup>Research Group for Ancient Genomics and Evolution, Max Planck Institute for Developmental Biology,  
9 72076 Tübingen, Germany

10 <sup>3</sup>Institute of Archaeological Sciences, University of Tübingen, 72070 Tübingen, Germany

11 <sup>4</sup>Senckenberg Center for Human Evolution and Paleoenvironment, University of Tübingen, 72070  
12 Tübingen, Germany

13 <sup>5</sup>Gregor Mendel Institute, Austrian Academy of Sciences, 1030 Vienna, Austria

14 <sup>6</sup>Department of Ecology and Evolution, University of Chicago, Chicago, Illinois 60637, USA

15 <sup>7</sup>Institute of Tibet Plateau Research, Chinese Academy of Sciences, Beijing 100101, China

16 <sup>8</sup>Department of Biology, University of Toronto Mississauga, Mississauga, Ontario L5L 1C6, Canada.

17 <sup>9</sup>Max Planck Institute for the Science of Human History, 07743 Jena, Germany

18 †Co-first authors

19 §Current addresses: INRA, UMR 1202 Biodiversité Gènes & Communautés, 69 route d'Arcachon, 33610  
20 CESTAS, France (B.B.); Computomics, 72072 Tübingen, Germany (J.H.); Department of Biosystems  
21 Science and Engineering, ETH Zurich, 4058 Basel, Switzerland (D.G.G.).

22 \*Correspondence: [weigel@weigelworld.org](mailto:weigel@weigelworld.org) (D.W.), [hernan.burbano@tuebingen.mpg.de](mailto:hernan.burbano@tuebingen.mpg.de) (H.A.B.)

23

24 Short title: Mutation and selection in *Arabidopsis thaliana*

25 Character count: 68,031 (with spaces, without table & figures)

26 Keywords: colonization; mutation; herbarium; phylogenomics, population genomics; *Arabidopsis thaliana*

## 27 **SUMMARY**

28 Like many other species, the plant *Arabidopsis thaliana* has been introduced in recent history from its  
29 native Eurasian range to North America, with many individuals belonging to a single lineage. We have  
30 sequenced 100 genomes of present-day and herbarium specimens from this lineage, covering the time  
31 span from 1863 to 2006. Within-lineage recombination was nearly absent, greatly simplifying the genetic  
32 analysis, allowing direct estimation of the mutation rate and an introduction date in the early-17<sup>th</sup>  
33 century. The comparison of substitution rates at different sites throughout the genome reveals that  
34 genetic drift predominates, but that purifying selection in this rapidly expanding population is  
35 nevertheless evident even over short historical time scales. Furthermore, an association analysis  
36 identifies new mutations affecting root development, a trait important for adaptation in the wild. Our  
37 work illustrates how mutation and selection rates can be observed directly by combining modern  
38 genetic methods and historic samples.

## 39 **HIGHLIGHTS**

- 40 • A historically young colonizing lineage of *Arabidopsis thaliana* allows observation of contemporary  
41 evolutionary forces.
- 42 • Genomes from specimens collected over 150 years support direct calculation of mutation rates  
43 occurring in nature.
- 44 • Drift predominates, but purifying selection is evident genome-wide over historical time scales.
- 45 • New mutations with phenotypic effects can be identified and traced back in time and space.

## 47 **INTRODUCTION**

48 If we want to understand evolution and especially adaptation, we need to know rates of mutation and  
49 selection, which together determine the substitutions that can be observed in a population. Typically,  
50 one tries to infer evolutionary parameters from patterns of genetic diversity in extant individuals of a  
51 species. Unfortunately, demographic and genetic factors such as migration, fluctuating population sizes,  
52 recombination and gene conversion greatly complicate such inferences. Many scientists have therefore  
53 chosen to focus on mutations only, measuring their accumulation in artificial conditions, using mutation  
54 accumulation lines grown in the laboratory (Halligan and Keightley, 2009), or over very short time  
55 scales, for example in human parent-offspring trios (Roach et al., 2010).

56 An alternative approach is the use of older, but still simple lineages with limited genetic diversity,  
57 such as colonizing populations that have undergone a recent, strong genetic bottleneck. Such  
58 populations can be considered natural experiments in which one can test ecological or evolutionary  
59 hypotheses (Gauze, 1934; Maron et al., 2004; Sax et al., 2007). Recent colonization events permit the  
60 quantification of evolutionary forces related to adaptation – mutation, selection, genetic drift,  
61 recombination – that are still not well understood in invasion ecology (Barrett, 2014; Bock et al., 2015;  
62 Lee, 2002).

63 Humans have increasingly blurred biogeographical boundaries of species outside their native  
64 range by planned or serendipitous dissemination. While the exact reasons for success or failure in alien  
65 environments remain unclear, many species can become established in new areas, with North America  
66 being the continent with the highest number of naturalized plants (van Kleunen et al., 2015). Among  
67 these is the model plant *Arabidopsis thaliana*, which is native to Eurasia but has recently colonized and  
68 spread throughout much of North America (Platt et al., 2010). Although *A. thaliana* is not an invasive  
69 species, it has traits typical for successful colonizers, such as a high selfing rate, a durable seed bank and  
70 a short generation time (Baker, 1965).

71 Colonizing populations often start with very few individuals and therefore have low genetic  
72 diversity. The N. American *A. thaliana* population is much less diverse than what is seen in the native  
73 range, with one predominant lineage, named haplogroup-I (HPGI), accounting for about half of all N.  
74 American individuals (Platt et al., 2010). The success of an isolated, selfing lineage that is genetically very  
75 uniform seems to contradict the common idea that such lineages are evolutionary dead-ends because  
76 they can adapt only through *de novo* mutations, a process predicted to be much slower than adaptation  
77 from standing variation (Barrett and Schluter, 2008), although we cannot know how long this lineage will  
78 last.

79 Ideally, to evaluate all evolutionary trajectories, including unsuccessful ones, one should have  
80 access not only to the evolved extant individuals, but also to their “unevolved” ancestors. The power of  
81 temporal transects has been aptly demonstrated with the genetic analysis of historical and archaeological  
82 samples of humans and microbes, relying on advances in the study of ancient DNA (aDNA) (Orlando et  
83 al., 2015; Shapiro and Hofreiter, 2014). Natural history collections that cover the past several hundreds  
84 of years offer an exciting, underused resource for such studies (Martin et al., 2013; Staats et al., 2013;  
85 Vandepitte et al., 2014; Weiß et al., 2015; Yoshida et al., 2013).

86 There is a rich history of sampling plants and storing them in herbaria. Importantly, herbaria do  
87 not merely house exotic, rare species collected in the more distant past, but also common plants that  
88 have been sampled for many decades over and over again, making them powerful tools for monitoring

89 recent colonization events in space and time (Crawford and Hoagland, 2009; Lankau et al., 2009). Such  
90 a resource exists for N. American *A. thaliana*. Here, we compare genomes from herbarium specimens,  
91 collected between 1863 to 1993, and from live individuals, collected between 1993 and 2006, to date  
92 the origin of this lineage, and infer mutation rates, selection, demography and migration routes. We also  
93 identify *de novo* mutations in this lineage that are associated with phenotypes likely to be under selection  
94 in the wild, which in turn correlate with climatic variables. Our analyses of a colonizing *A. thaliana* lineage  
95 serve as a blueprint for future studies of similar colonizing or otherwise recently bottlenecked  
96 populations, in order to understand mutation, selection and rapid adaptation in nature.

## 97 **RESULTS AND DISCUSSION**

### 98 **Herbarium and modern HPGI genomes**

99 When analyzed with 149 genome-wide, intermediate-frequency SNP markers, about half of over 2,000  
100 North American *A. thaliana* individuals collected between 1993 and 2006 were found to be very similar  
101 (Platt et al., 2010). A recent study of 13 individuals from this collection confirmed that their genomes  
102 were indeed almost identical (Hagmann et al., 2015). We selected 74 additional individuals for Illumina  
103 whole-genome sequencing, aiming for broad geographic representation, and, where available, at least  
104 two accessions per collection site (Fig. 1; Table S1).

105 We aimed to complement these data with genome information from 36 herbarium specimens  
106 collected between 1863 and 1996 (Fig. 1; Table S1). To avoid contamination from exogenous sources,  
107 DNA extraction and Illumina library preparation were carried out in a clean-room facility. Between 30%  
108 and 86% of sequencing reads mapped to the *A. thaliana* reference genome (Fig. S1A), compared to ~90%  
109 for the modern individuals. A number of biochemical features define aDNA and can be used to verify  
110 authenticity (Krause et al., 2010; Prüfer and Meyer, 2015; Weiss et al., 2015). Typical for aDNA, most  
111 DNA fragments were shorter than 100 bp (Fig. S1B). Deamination of cytosines to uracils at the end of  
112 aDNA fragments (Hofreiter et al., 2001) is seen as cytosine to thymine (C-to-T) substitutions upon  
113 sequencing (Briggs et al., 2007), and this rate of substitution at first sequenced base was between 1.3 to  
114 4.4% in the different sequenced libraries (Fig. S1C). Moreover, aDNA breaks preferentially at purines  
115 (Briggs et al., 2007), and purines were 1.5 – 1.8-fold enriched at fragment ends (Fig. S1D). Together this  
116 indicated that DNA recovered from *A. thaliana* herbarium specimens was authentic.

117 Coverage of sequenced historic samples was 3- to 42-fold for herbarium and 22- to 105-fold for  
118 modern samples. To identify within-lineage sequence differences, reads were mapped against an HPGI  
119 pseudoreference (Hagmann et al., 2015). We focused on single nucleotide polymorphisms (SNPs)

120 because accurate identification of structural variants from short reads is difficult, particularly so in old  
121 DNA molecules that have suffered from chemical breakage (Weiß et al., 2015). The herbarium genomes  
122 subsequently confirmed as HPGI had 96.8 to 107.2 Mb of the HPGI pseudoreference covered by at  
123 least three reads, compared with 108.0 to 108.3 Mb in the modern genomes. We found 109 to 222  
124 SNPs relative to the HPGI pseudoreference in the herbarium genomes, and 186 to 299 SNPs in the  
125 modern genomes.

## 126 **Diversity and relationships within HPGI**

127 Among the 87 modern individuals, seven clearly did not belong to the HPGI lineage, which could be due  
128 to errors in the initial genotyping, or to lack of resolution based only on 149 SNPs. Four additional  
129 individuals that were identical to the rest of the HPGI lineage at the 149 genotyped SNPs (Fig. S2A)  
130 appeared to have small stretches of introgression from other lineages and were therefore classified as  
131 non-HPGI, as indicated by several methods (e.g., Fig. S2B). Of the 36 herbarium samples, nine turned  
132 out to be non-HPGI lines (Fig. S2A and S2B). In total, 76 modern and 27 herbarium samples were  
133 identified as HPGI by means of neighbor-joining trees and multidimensional scaling (MDS), including the  
134 12 oldest herbarium specimens (Fig. S2C). The obvious homogeneity and abundance of HPGI compared  
135 to other N. American lineages greatly simplified its classification.

136 After removal of non-HPGI lines, the HPGI neighbor-joining tree reconstruction resulted in a  
137 star-like phylogeny (Fig. 2A). MDS could not differentiate samples within the HPGI group, with the first  
138 and second dimensions each explaining only small amounts of variance, 8.8% and 8.0% (Fig. 2B). A  
139 parsimony network identified a small fraction of reticulations indicative of intra-HPGI recombination  
140 (Fig. 2C). Removing three potential intra-HPGI recombinants resolved the reticulations (Fig. 2D). The  
141 remaining 73 modern and 27 herbarium samples (Table S1) appeared to constitute a clonal lineage  
142 devoid of effective recombination and population structure, with no SNPs detected in chloroplasts nor  
143 mitochondrial genomes, and with very low genome-wide nuclear diversity ( $\pi = 0.000002$ ,  $\theta_w = 0.00001$ ,  
144 4,368 segregating sites), which is two orders of magnitude lower than in the native range ( $\theta_w = 0.008$ )  
145 (Cao et al., 2011; Nordborg et al., 2005). The enrichment of low frequency variants (Tajima's  $D = -2.84$ )  
146 and low levels of polymorphism in surveyed genomes is consistent with a recent bottleneck followed by  
147 population expansion. We hypothesize that the bottleneck corresponds to a colonization founder event,  
148 likely by one or only few very closely related individuals.

149 Although there was little evidence for intra-lineage recombination among the 100 remaining  
150 individuals, a few isolated SNPs were shared between independent branches of the tree (Fig. 2A). We  
151 therefore also formally estimated recombination within HPGI. The estimate was much lower ( $4N_e r = \rho$

152 =  $3.0 \times 10^{-6}$  cM bp<sup>-1</sup>) than for a similar-sized collection of diverse *A. thaliana* individuals from the native  
153 range ( $\rho = 7.5 \times 10^{-2}$  cM bp<sup>-1</sup>) (Choi et al., 2013). Linkage disequilibrium parameter  $D'$  did not decay with  
154 physical distance (intercept = 0.99, slope = 0.00,  $p < 0.0001$ ) among all SNP pairs. Furthermore, only  
155 0.02% of SNP pairs were not in complete linkage disequilibrium ( $D' < 1$ ), indicating extensive linkage  
156 between chromosomes. The four-gamete test, which determines whether all four possible gametes (ab,  
157 aB, Ab, AB) are observed for two segregating loci, revealed that all configurations of SNPs could be  
158 explained with as few as 38 recombination events for the 100 genomes. We argue that this number of  
159 potential recombination events is sufficiently small that it does not invalidate the application of  
160 phylogenetic methods to the HPGI genomes, even though such methods are normally not appropriate  
161 for genome-wide analyses. Indeed, other sources of failure of the four-gamete test and the violation of  
162 phylogenetic assumptions could be sequencing errors, or lineage sorting of segregating sites from the  
163 ancestral population.

164 To describe intra-HPGI relationships in a more sophisticated manner than with a simple  
165 neighbor-joining approach, we used Bayesian phylogenetic inference. We took advantage of the broad  
166 distribution of collection dates of our herbarium samples (Fig. 1B) for tip calibration of phylogenetic  
167 trees. The method that we used reconstructs a tree calibrated in time, based on genetic distance  
168 between samples collected at different points in time. In this tree, the 76 modern individuals formed a  
169 virtually monophyletic clade, with only four interspersed herbarium samples from the second half of the  
170 20<sup>th</sup> century (Fig. 3A, B, Table S1). Geographic proximity did not explain the close genetic relationship of  
171 these four herbarium and the modern individuals (Fig. 1, Table S1).

## 172 **Estimates of mutation rate and spectrum in the wild**

173 To estimate the substitution rate in the HPGI lineage, we used a distance- and a phylogeny-based  
174 method, both of which take advantage of the collection dates of our samples. It is necessary to  
175 distinguish between substitutions and mutations. The substitution rate is the observed cumulative  
176 change in DNA that results from several evolutionary forces, such as demography and natural selection.  
177 These forces act in concert on the new mutations produced by DNA damage, repair and replication  
178 errors, which are presumed to be constant over time (Barrick and Lenski, 2013).

179 In the distance method, the substitution rate is first calculated from the correlation of distances  
180 of collecting dates with genetic distances, as measured in number of substitutions, then scaled to the size  
181 of the genome accessible to Illumina sequencing (Fig. 3C). With this method, we estimated a rate of  $3.3$   
182  $\times 10^{-9}$  substitutions site<sup>-1</sup> year<sup>-1</sup> (95% bootstrap Confidence Interval [CI]:  $2.9$  to  $3.6 \times 10^{-9}$ ). If one  
183 changes the thresholds for base calling, this affects both the number of called SNPs, and the fraction of

184 the genome that is interrogated for variants. We therefore explored how either more relaxed or more  
185 stringent base calling methods affected our substitution rate estimates. We used three quality thresholds  
186 of increasing stringency (see Experimental Procedures for details) and found that the impact was  
187 negligible, with mean substitution rate estimates ranging from  $3.0$  to  $4.0 \times 10^{-9}$ , compared to our  
188 standard threshold, which had given  $3.3 \times 10^{-9}$  substitutions site<sup>-1</sup> year<sup>-1</sup>.

189 The Bayesian phylogenetic approach uses the collection years as tip-calibration points; its  
190 application resulted in a very similar estimate,  $4.0 \times 10^{-9}$  substitutions site<sup>-1</sup> year<sup>-1</sup> (95% Highest Posterior  
191 Probability Density [HPD]:  $3.2$  to  $4.7 \times 10^{-9}$ ). We confirmed MCMC chain convergence on demographic  
192 and tree topology parameters by repeating the analysis with this rate. The stability of all parameters  
193 indicated that under a low complexity scenario with no population structure or recombination,  
194 phylogenetic and population genetic methods generate congruent evolutionary rates.

195 Under neutral evolution, substitution and mutation rates should be the same, but typically  
196 substitution rates are expressed per year, whereas mutation rates are expressed per generation, among  
197 other conceptual differences (Barrick and Lenski, 2013; Kimura, 1967). Although *A. thaliana* has an  
198 annual life cycle, the generation time in nature has been estimated to average 1.3 years (Lundemo et al.,  
199 2009), because seeds could potentially survive 3 to 5 years in a seed bank (Montesinos et al., 2009). To  
200 correctly compare the substitution rates from our study with mutation accumulation lines propagated in  
201 the greenhouse (Ossowski et al., 2010), we re-scaled the estimated substitution rate by the 1.3 year  
202 average, resulting in  $4.2 \times 10^{-9}$  substitutions site<sup>-1</sup> generation<sup>-1</sup> (95% CI  $3.7$  to  $4.7 \times 10^{-9}$ ) (Fig. 3E, Table  
203 S3).

204 To obtain the best possible estimate of short-term mutation rates for comparison, we  
205 reanalyzed a recent re-sequencing dataset of mutation accumulation lines grown in the greenhouse  
206 (Hagmann et al., 2015); from this, we confirmed a rate of  $7.1 \times 10^{-9}$  mutations site<sup>-1</sup> generation<sup>-1</sup> (95% CI  
207  $6.3$  to  $7.9 \times 10^{-9}$ ) (see Table S2 and Extended Experimental Procedures). In several species, including  
208 *Escherichia coli* (Sniegowski et al., 1997) and *A. thaliana* (Jiang et al., 2014), growth under abiotic stress  
209 can increase mutation rates. Although wild conditions can be considered moderately stressful  
210 environments compared to standard greenhouse conditions, we found the generation-corrected  
211 substitution rate in the HPGI lineage to be lower than the mutation rate in greenhouse lines. The  
212 mutation spectrum was, however, closer to that of greenhouse lines exposed to salt stress (Jiang et al.,  
213 2014) than to the greenhouse lines grown under standard conditions (Ossowski et al., 2010) (Fig. 3D).  
214 One possible contributor to a shift in mutation spectrum is DNA methylation, since methylated  
215 cytosines are more likely to undergo substitutions than unmethylated cytosines, something that has been  
216 observed in other natural accessions (Cao et al., 2011; Hagmann et al., 2015).

## 217 **Genome-wide inference of selection**

218 One likely explanation for the unexpected differences between the greenhouse mutation rate and our  
219 estimate from the HPGI population (Fig. 3E) is the effect of purifying selection, which should slow the  
220 accumulation of mutations in the wild. In other organisms, including humans, estimates of short- and  
221 long-term mutation rates differ considerably and have motivated a hot debate (Ho et al., 2005; Scally and  
222 Durbin, 2012; Ségurel et al., 2014; Subramanian and Lambert, 2011). In humans, counterintuitively,  
223 pedigree-based short-term estimates of nuclear mutation rates are lower (Kong et al., 2012; Roach et  
224 al., 2010) than long-term estimates based on interspecific phylogenies (Nachman and Crowell, 2000).  
225 Recently, the use of DNA retrieved from dated fossils (Fu et al., 2014) and new methods incorporating  
226 recombination map scaling (Lipson et al., 2015) have produced more concordant, intermediate mutation  
227 rates estimates. That long-term rates are lower is expected, since purifying selection would have had  
228 more time to effectively remove deleterious mutations from the population. Indeed, older calibrating  
229 points in human-great ape phylogenies have yielded lower substitution rate estimates (Subramanian and  
230 Kumar, 2003). Alternatively, long- and short-term rates may really be different, because of changes in  
231 generation times or fluctuating mutation rates (Green and Shapiro, 2013). Discrepancy could perhaps  
232 also come from intra-specific variation in mutation rates (e.g. the effect of genetic background), reported  
233 to be more than 7-fold across genotypes of *Chlamydomonas reinhardtii* (Ness et al., 2015). This, however,  
234 does not seem to apply when comparing natural and greenhouse populations. Phylogenetic and  
235 regression-based methods produced very similar estimates for the HPGI population, and were similar  
236 to mutation rate measurements in a greenhouse population with an exactly known number of  
237 generations. We attribute the small differences between the *A. thaliana* populations to either the  
238 efficiency of purifying selection over different temporal and environmental scales or to imperfect  
239 knowledge of generation time.

240 To test the purifying selection hypothesis, we compared mutation rates in differently annotated  
241 portions of the genome. Ideally, one would compare synonymous substitutions at four-fold degenerate  
242 sites with non-synonymous substitutions, but there were too few of such substitutions in our data set to  
243 achieve appropriate statistical power (on average 0.9 four-fold and 2.7 nonsynonymous mutations per 30  
244 generations in mutation accumulation lines). We therefore used the net distances method to compare  
245 rates in intergenic regions with whole-genome rates. The comparison of mutation rates across  
246 annotations supported the hypothesis that purifying selection is the cause of different mutation rate  
247 estimates in the HPGI and greenhouse populations. The estimate for whole-genome rates was 33.59%  
248 (95% CI 33.59 – 33.60) lower than the intergenic estimate in the HPGI lineage, compared to 26.04%  
249 (95% CI 21.44 - 29.31%) in the greenhouse population (Fig. 3E). In addition, medium-frequency variants



250 (4%  $\leq$  allele frequency  $\leq$  50%) were more strongly depleted in the whole-genome set compared to  
251 intergenic regions (Fisher's Exact test,  $p=0.03$ ) in the HPGI lineage.

252 The observed rate at which new mutations accumulate in populations, the substitution rate,  
253 depends on both the number of individual genomes in the population in which mutations occur, for  
254 diploid species  $2 N_e$ , and on the selection coefficient  $s$ , affecting the probability of fixation of a mutation.  
255 When selection is negligible and only genetic drift operates, the probability of fixation of a new mutation  
256 is equal to its frequency ( $1/2 N_e$ ). Under neutrality, the observed rate at which mutations accumulate  
257 equals the rate at which mutations arise. If we assume that the behavior of intergenic substitutions is  
258 close to neutrality, we can use it as the reference mutation rate,  $\mu$ , and compare it with the genome-  
259 wide substitution rate,  $k$ , to solve for the genome-wide selection coefficient of the fixation probability  
260 equation from Kimura (1967). The coefficient responsible for the genome-wide deficit in substitutions  
261 was  $N_e s = -0.76$ . Only a coefficient scaled by population size is meaningful in our context, since theory  
262 predicts that selection is efficient when  $N_e |s| > 1$ , where  $|s|$  is the absolute value of a hypothetical semi-  
263 dominant genome-wide selection coefficient. Our estimate is negative, suggesting a net effect of purifying  
264 selection, but its value is smaller than 1, indicating that the number of substitutions is largely determined  
265 by population drift (Charlesworth and Charlesworth, 2010).

266 We were curious whether our result of net inefficient purifying selection is related to the  
267 mating system, namely predominant selfing, or the recent genetic bottleneck of the HPGI lineage. A  
268 previous point estimate of the coefficient of selection  $N_e s$  in *A. thaliana* was  $\sim -0.8$ , using an approach  
269 based on polymorphism within *A. thaliana* and divergence between *A. thaliana* and its close relative *A.*  
270 *lyrata* in 12 nuclear genes (Bustamante et al., 2002). The same study reported that in the genus  
271 *Drosophila*  $N_e s$  was positive and greater than one, indicative of widespread and effective selection. The  
272 authors hypothesized that in highly selfing species,  $N_e$  decreases due to inbreeding, reducing the ability of  
273 selection to purge slightly to moderately deleterious mutations, consistent with other studies  
274 (Charlesworth and Wright, 2001; Ness et al., 2010; Wright et al., 2008).

275 We recognize that averaging selection coefficients across the entire genome may be  
276 inappropriate if different genomic features are under very different selection regimes, resulting in a  
277 highly dispersed or even bimodal distribution of selection coefficients. Point estimates should therefore  
278 be treated with caution. Keightley and Eyre-Walker (2007) showed that this is the case in humans, by  
279 estimating the distribution of purifying selection coefficients using the distribution of predicted fitness  
280 effects of various polymorphisms. They found, however, that this did not apply to *Drosophila*  
281 *melanogaster*, where almost the entire genome was under strong purifying selection, with  $N_e s > 100$   
282 (Keightley and Eyre-Walker, 2007). A case that may resemble more closely HPGI evolution is that of

283 the plant *Eichhornia paniculata*, which experienced a recent intra-species transition to selfing. As a  
284 consequence, purifying selection coefficients have become more broadly distributed, with the  
285 proportion of almost neutral coefficients having increased due to low  $N_e$ , and the proportion of strongly  
286 negative coefficients also having increased due to homozygosity, which uncovers recessive deleterious  
287 sites (Arunkumar et al., 2015). Given these studies and our average selection coefficient estimate, we  
288 hypothesize that a combination of brief evolutionary history and low  $N_e$  has reduced the efficiency of  
289 natural selection, with only highly deleterious mutations being eliminated. More information could be  
290 obtained by developing new models and performing simulations of site frequency spectra that include  
291 different demographic scenarios in combination with selfing.

### 292 **Phenotypic effect and spatiotemporal context of *de novo* mutations**

293 In the HPGI lineage, drift seems to determine genome-wide polymorphism patterns, but there is some  
294 evidence for purifying selection. We wondered whether, in addition, we would be able to find signals of  
295 adaptive, positive selection, expected to be much rarer and thus much more difficult to detect. Selection  
296 scans based on population divergence or haplotype sharing decay are inappropriate when divergence  
297 between samples is low and/or when there is high intra- and inter-chromosomal linkage disequilibrium.  
298 We therefore adopted an association approach in an effort to link segregating mutations to climatic  
299 variables as well as phenotypic variation in several traits of likely ecological relevance: flowering  
300 phenology, fruit set (fecundity), seed size, root growth and morphology. Replicated measurements of  
301 phenotypic traits in controlled conditions showed significant quantitative variation between lines as  
302 described by broad sense heritability (Table S4). HPGI individuals resemble near isogenic lines (NILs) in  
303 that they share large segments of the genome. Formally, genetic mapping with NILs seeks to associate  
304 phenotypes with large blocks of linked variants. It has been successfully used to examine the genetic  
305 basis of many different traits in crop species (Brouwer and St Clair, 2004; Stec et al., 2013; Szalma et al.,  
306 2007; Xie et al., 2006) and also in *A. thaliana* (Bentsink et al., 2010; Fletcher et al., 2013; Keurentjes et al.,  
307 2007; Swarup et al., 1999; Weigel, 2012). Our approach has the advantage that it can discern the  
308 phenotypic effects of a limited number of mutations free from confounding population structure (see  
309 Extended Experimental Procedures). In association analyses, statistical power relies on variants with a  
310 certain minimum frequency, hence we only considered ~400 variants with at least 5% allele frequency.  
311 These are, however, not independent due to linkage disequilibrium, thus rather comprise haplotypes  
312 (Templeton et al., 1988). Focusing on intermediate frequency variants not only increases statistical  
313 power, but is also more likely to reveal adaptive mutations, because intermediate frequency variants will  
314 be on average older and less likely to be deleterious.

315 With permutation tests to assess significance, we found several root phenotypes to be  
316 significantly associated with 79 SNPs. Thirty-six of these were in protein coding genes and nine resulted  
317 in non-synonymous substitutions. Nineteen other SNPs were associated with climate variables  
318 ([www.worldclim.org/bioclim](http://www.worldclim.org/bioclim)) even after correction for latitude and longitude. Eight of these were  
319 located in genes, and four resulted in non-synonymous substitutions (Table I, Table S4, S5). We did not  
320 find SNPs that were significantly associated with flowering, fecundity or seed size. In addition to  
321 permutation testing, we applied a Bonferroni corrected significance threshold to account for multiple  
322 traits tested. As an alternative to the permutation approach, we adjusted the significance threshold for  
323 multiple traits and SNPs tested. Even with these two very conservative approaches, 13 and four genic  
324 SNPs remained significant for root phenotypes and climate variables, respectively (Table I).

325 The most common climate variable with significant SNP associations was precipitation during  
326 the warmest quarter of the year, followed by mean temperature during the wettest quarter, and  
327 precipitation during the wettest quarter and month. Some SNPs were associated with both climate  
328 variables and root phenotypes, with the caveat that these traits can be correlated, for example, root  
329 growth-related traits with precipitation-related variables and root gravitropism-related traits with  
330 temperature-related variables. The non-independence of traits would have made our multiple testing  
331 correction procedures even more stringent. SNPs associated with root variables alone and/or with  
332 climate variables were first observed in older herbarium samples when compared with random SNPs  
333 segregating at similar allele frequencies (Fig. 5A). This suggested an older origin for variants associated  
334 with relevant phenotypes, which could point to positive selection having maintained them for over a  
335 century.

336 Three SNPs in AT5G19330, AT1G54440 and AT2G16580 appeared particularly interesting (Fig.  
337 S6 D-F). AT5G19330 overexpression increases salt stress tolerance (Kim et al., 2004). As proof of  
338 concept and alternative corroboration of association analyses, we looked for very closely related  
339 accessions (<<10 SNPs in other coding regions) that differed at AT5G19330. There were 20 such pairs  
340 and they differed more in their gravitropic score phenotype than random pairs and almost-identical pairs  
341 (Fig. S6, see Extended Experimental Procedures). AT1G54440, also associated with gravitropism,  
342 encodes an epigenetic regulator, an RRP6-like protein (Zhang et al., 2014), while AT2G16580, associated  
343 with root growth rate, encodes a member of the auxin-related SAUR family (Markakis et al., 2013;  
344 Spartz et al., 2012). Together, these analyses suggest that root development is an ecologically relevant  
345 trait in colonization of North America by HPGI, perhaps with a role in adaptation to climate-related  
346 factors such as drought.

347 The SNP in AT5G19330 was not in perfect linkage disequilibrium with other significant SNPs  
348 ( $r^2 < 0.6$ ), but some of the other candidates were strongly linked (Fig. S6 E-F). Although linkage could  
349 have a biological cause, e.g., simultaneous natural selection over different loci, we must point out that  
350 estimated SNP effects may suffer from statistical confounding. Hence, the associated phenotypic effects  
351 could correspond to one or several groups of linked mutations across chromosomes, maybe even  
352 undetected causal variants, that arose simultaneously in the history of HPGI population (Fig. S6 B-C).  
353 Additional genetic analyses such as artificial crosses will help to disentangle the effects of individual SNPs.

### 354 **Population demography and migrations**

355 The substitution rate estimate immediately allows dating of the HPGI colonization of North America.  
356 We first inferred the root of the HPGI phylogenetic tree using Bayesian methods. The mean estimate  
357 was the year 1597 (Highest Posterior Probability Density 95%: 1519-1660) (Fig. 3A, B). We also used a  
358 non-phylogenetic method that utilizes the relationship among the genetic distance of two individuals,  
359 their average divergence time, and the mutation rate. The average divergence  $d$  between sequences can  
360 be approximated by the mutation rate  $\mu$  multiplied by twice the divergence time  $L$ , since mutations  
361 accumulate on both branches of diverging sequences:

$$362 \quad d = 2L \times \mu$$

363 We used our previously estimated substitution rate and the average pairwise genetic distance to  
364 calculate a divergence time of 363 years. Subtracting this age from the average collecting date of our  
365 samples gave a point estimate of 1615, very close to the Bayesian estimate of 1597. Both are in  
366 agreement with a colonization in the post-Columbian era. We believe the substitution rate in the wild  
367 reported here is more appropriate when dating evolutionary events in *Arabidopsis thaliana* than using the  
368 higher greenhouse mutation rate, from which we had previously inferred a more recent colonization of  
369 N. America by HPGI (Hagmann et al., 2015).

370 Knowing both the mutation rate  $\mu$  and average pairwise differences  $\pi$ , we can obtain an  
371 approximate estimate of the effective population size ( $N_e$ ), by solving the equation  $\pi < 4N_e\mu < \theta_w$ , from  
372 which we can place  $N_e$  somewhere between 152 - 758. A single  $N_e$  value represents the harmonic mean  
373 of  $N_e$  over time, and thus is much closer to the historic  $N_e$  minimum than to the arithmetic average over  
374 time (Wright, 1940). That  $N_e$  is so small is consistent with the recent HPGI founder bottleneck.  
375 Pairwise genetic distances between samples within the same decade, an approximate measure of  
376 diversity, increased over time (Fig. S5), which supports a trend of historic population growth. More  
377 sophisticated inference of  $N_e$  through time came from our dated phylogeny and its coalescent model  
378 (Fig. 3B). However, our model had no resolution at the root of the tree, where population size could be

379  $N_e=1$ , since HPGI may have been founded by a single individual, or a few almost identical individuals.  
380 Until the early 19<sup>th</sup> century, the model suggested exponential population growth, followed by slight  
381 shrinkage (Fig 3B). The shrinkage in population during the last century is reflected in time-calibrated  
382 phylogenies (Fig. 3 A, B), which showed that modern samples descended from a very limited number of  
383 historic sublineages, with only four 20<sup>th</sup>-century herbarium samples being closely related to modern  
384 samples. Altogether, population size fluctuations and the disjoint distribution of *A. thaliana* today (Platt et  
385 al., 2010) suggest that the N. American population passed through recurrent bottlenecks since the initial  
386 colonization.

387         Since we knew both the collection years and origins of the HPGI samples, we could also analyze  
388 the migration dynamics of HPGI. The phylogeographic models suggested that HPGI dispersed over  
389 much of its modern range already soon after its introduction to N. America (Fig. S5 A, B). Based on the  
390 collection dates and sites of the herbarium samples, we postulate that the oldest populations were  
391 established in the Northeast, from where they migrated west in discrete long-distance dispersions, likely  
392 helped by humans. Corroborating this hypothesis, we found a significant correlation between collection  
393 date and either latitude (linear regression coefficient  $r = 0.32$ ;  $p = 3.5 \times 10^{-10}$ ) or longitude ( $r = 0.20$ ;  $p =$   
394  $3.7 \times 10^{-6}$ ) (Fig. 4A), which we interpret as a net, yet highly dispersed, movement in a Northwestern  
395 direction over time. Additional support comes from an isolation-by-distance signal, which is most  
396 consistent with a historic westward dispersion and a more recent reverse eastward migration (Fig. 4 B,  
397 C; see Extended Experimental Procedures). The Lake Michigan area, where major populations are found  
398 today, was both the apparent source of new migrants and the region where most derived alleles of SNPs  
399 associated with root and climate traits first appeared (Fig. 5B). The coincidence between these patterns  
400 of HPGI diversity and land use change for agricultural purposes in the last two centuries (Goldewijk and  
401 Ramankutty, 2004) is striking, although historical sampling biases are unknown. We hypothesize that  
402 agricultural changes could have driven the initial establishment of HPGI in N. America, since most  
403 current *A. thaliana* habitats are used agriculturally or are cultivated by humans in other ways.

## 404 **CONCLUSIONS**

405 We have exploited whole-genome information from historic and contemporary collections to  
406 understand fine-scale genome evolutionary dynamics in the context of a recent colonization by  
407 *Arabidopsis thaliana*. By deriving a rigorously supported estimate for the mutation rate in the wild, we  
408 have answered the long-standing question of how rapidly diversity is generated in natural plant  
409 populations. We have presented evidence that purifying selection explains the discrepancy between  
410 short- and long-term mutation rate estimates. Finally, even though rapidly expanding populations such as

411 the one studied here are severely affected by drift, limited in diversity, and likely constrained by purifying  
412 selection, we found *de novo* mutations with apparent phenotypic effects that could have been subject to  
413 Darwinian, adaptive selection. Recent invasion and colonization events such as the *A. thaliana* HPGI  
414 example are natural experiments ideally suited for analyzing adaptation to new environments. Finally,  
415 our work should encourage others to unlock the potential of herbarium specimens for the study of  
416 evolution in action.

## 417 **EXPERIMENTAL PROCEDURES**

418 Additional details are given in the Extended Experimental Procedures in Supplemental information.

### 419 **Sample collection and DNA sequencing**

420 Modern *A. thaliana* accessions were from the collection described by Platt and colleagues (2010); HPGI  
421 candidates were identified based on 149 genome-wide SNPs (Table S1). Herbarium specimens  
422 (collection dates 1863-1993) were directly sampled by our colleagues Jane Devos and Gautam Shirsekar,  
423 or sent to us by collection curators from various herbaria (Table S1). DNA from herbarium specimens  
424 was extracted as described (Yoshida et al., 2013) in a clean room facility at the University of Tübingen.,  
425 Two sequencing libraries with sample-specific barcodes were prepared following established protocols,  
426 with and without repair of deaminated sites using uracil-DNA glycosylase and endonuclease VIII (Briggs  
427 et al., 2010; Kircher, 2012; Meyer and Kircher, 2010). DNA from modern individuals was extracted  
428 from pools of eight siblings of each inbred line. Genomic DNA libraries were prepared using the TruSeq  
429 DNA Sample prep kit or TruSeq Nano DNA sample prep kit (Illumina, San Diego, CA), and sequenced  
430 on Illumina HiSeq and MiSeq instruments. Reads were mapped with GenomeMapper v0.4.5s  
431 (Schneeberger et al., 2009) against an HPGI pseudo-reference genome (Hagmann et al., 2015), and  
432 against the Col-0 reference genome. Samples JK2509 to JK2531 were only mapped to the HPGI  
433 pseudo-reference genome. Coverage, number of covered positions in the genome, and number of SNPs  
434 identified per accession relative to HPGI are reported in Table S1. We also re-sequenced the genomes  
435 of twelve mutation accumulation (MA) lines (Becker et al., 2011; Shaw et al., 2000) (Table S2).

### 436 **Phylogenetic methods and genome-wide statistics**

437 We used four methods to estimate the relationships among modern accessions, and between modern  
438 and herbarium samples: (i) multidimensional scaling (MDS) analysis; (ii) construction of a neighbor joining  
439 tree with the adegenet package in R (Jombart, 2008), with branch support assessed with 1,000 bootstrap  
440 iterations; (iii) construction of a parsimony network using SplitsTree v.4.12.3 (Huson and Bryant, 2006),

441 with confidence values calculated with 1,000 bootstrap iterations; (iv) performing a Bayesian  
442 phylogenetic analysis using BEAST v.1.8 (Bouckaert et al., 2014; Drummond et al., 2012) (see below).

443 We estimated genetic diversity as Watterson's  $\theta$  (Watterson, 1975) and nucleotide diversity  $\pi$ ,  
444 and the difference between these two statistics as Tajimas's  $D$  (Tajima, 1989) using DnaSP v5 (Librado  
445 and Rozas, 2009). We calculate the folded site frequency spectrum (SFS) as well as the unfolded SFS, for  
446 which we assigned the ancestral state using the *Arabidopsis lyrata* genome (Hu et al., 2011). We estimated  
447 pairwise linkage disequilibrium (LD) between all possible combinations of informative sites, ignoring  
448 singletons, by computing  $r^2$ ,  $D$  and  $D'$  statistics. For the modern individuals, we calculated the  
449 recombination parameter  $\rho$  ( $4Ner$ ) and performed the four-gamete-test (Hudson and Kaplan, 1985) to  
450 identify the minimum number of recombination events. All LD and recombination related statistics were  
451 determined using DnaSP v5 (Librado and Rozas, 2009).

## 452 **Substitution and mutation rate analyses**

453 We used genome-wide nuclear SNPs to calculate pairwise "net" genetic distances using the equation  $D'_{ij}$   
454  $= D_{ic} - D_{jc}$ , where  $D'_{ij}$  is the net distance between a modern sample  $i$  and a herbarium sample  $j$ ;  $D_{ic}$  the  
455 distance between the modern sample  $i$  and the reference genome  $c$ ; and  $D_{jc}$  is the distance between a  
456 modern sample ( $j$ ) and the reference genome ( $c$ ). We calculated a pair-wise time distance in years,  $T'_{ij}$ ,  
457 using the collection dates and linear regression:  $D' = a + bT'$ . The slope coefficient  $b$  describes the number  
458 of substitution changes per year. We used either all SNPs or subsets of SNPs at different annotations  
459 appropriately scaled by accessible genome length.

460 The second approach used Bayesian phylogenetics with the tip-calibration method implemented  
461 in BEAST v1.8 software (Drummond et al., 2012). Our analysis optimized simultaneously and in an  
462 iterative fashion using a Monte Carlo Markov Chain (MCMC) a tree topology, branch length,  
463 substitution rate, and a demographic Skygrid model. The demographic model is a Bayesian  
464 nonparametric one that is optimized for multiple loci and that allows for complex demographic  
465 trajectories by estimating population sizes in time bins across the tree based on the number of  
466 coalescent events per bin (Gill et al., 2012). We also performed a second analysis run using a fixed prior  
467 for substitution rate of  $3.3 \times 10^{-9}$  substitutions site<sup>-1</sup> year<sup>-1</sup> that we had estimated empirically using the  
468 net-distance method to confirm that the MCMC had the same parameter convergence, e.g. tree  
469 topology, as the first "estimate-all-parameters" run.

## 470 **Inference of genome-wide selection parameters**

471 We separately analyzed sequences at different annotations, since some regions should be under a  
472 different selection regime (less evolutionary constraint) than others. We estimated the average strength  
473 of genome-wide selection by contrasting substitution rates in the entire genome and in intergenic  
474 regions. We use the latter as a near-neutral contrast because it provides more statistical power in our  
475 sample with limited diversity, than the more usual contrast between synonymous (or fourfold  
476 degenerate) and non-synonymous sites. Selection was estimated based on the equation  $k = \mu \times Q \times 2N_e$ ,  
477 where  $Q$  is the fixation probability of a new mutation (Barrick and Lenski, 2013; Kimura, 1967), and the  
478 equation  $Q \approx s / 2N_e (1 - e^{-2N_e s})$  (Charlesworth and Charlesworth, 2010).

## 479 **Association analyses and dating of new mutations**

480 We collected flowering, seed and root morphology phenotypes for 63 modern accessions. For  
481 associations with climate parameters, we followed a similar rationale as described (Hancock et al., 2011).  
482 We extracted information from the publicly available bioclim database  
483 (<http://www.worldclim.org/bioclim>) at 2.5 degrees resolution raster and intersected it with geographic  
484 locations of HPGI samples ( $n = 100$ ). We performed association analyses under several models and  $p$ -  
485 value corrections using the R package GeneABEL (Aulchenko et al., 2007), with phenotypes and climatic  
486 variables as response variables and SNPs as explanatory variables and appropriate correcting covariates.  
487 Significance estimates were corrected with 1,000 permuted datasets, or with Bonferroni correction.

## 488 **Accession numbers**

489 Short reads have been deposited in the European Nucleotide Archive under the accession number TO  
490 BE UPDATED UPON ACCEPTANCE.

## 491 **SUPPLEMENTAL INFORMATION**

492 Supplemental Information includes Extended Experimental Procedures, six supplemental figures and six  
493 tables, and can be found online at TO BE UPDATED UPON ACCEPTANCE.

## 494 **ACKNOWLEDGEMENTS**

495 For providing and retrieving herbarium specimens, we thank Robert Capers (University of Connecticut),  
496 Jane Devos and Gautam Shirsekar (MPI), Michael S. Dossmann (Arnold Arboretum), John Freudenstein  
497 (Ohio State University), Cathy M. Herring (Agricultural Research Station, North Carolina State



498 University), Christine Niezgoda (Field Museum), Carol Ann McCormick (University of North Carolina),  
499 John Peter (New York Botanical Garden), and Marco Thines (Goethe University). We thank Xiaohui  
500 Zhao and Ian Henderson (SLCU) for recombination estimates in Eurasia, Christa Lanz (MPI) for support  
501 with sequencing, Christian Goeschl and Bettina Zierfuss (GMI) for assistance in root imaging, and Bonnie  
502 Wohlrab (GMI) for amplifying the seeds for root assays. We thank Magnus Nordborg for discussions  
503 and pointing us to the work of Templeton, Kay Pruefer for input on data analysis, Patricia Karlsson and  
504 Danelle Seymour for thorough proofreading and comments, and various present and past members of  
505 the Department of Molecular Biology of the Max Planck Institute for Developmental Biology for further  
506 comments on the manuscript. This work was supported by ERC Advanced Grant IMMUNEMESIS and  
507 the Max Planck Society.

## 508 **AUTHOR CONTRIBUTIONS**

509 H.A.B and D.W. conceived and supervised the project, and coordinated the collaborative effort. J.B.  
510 coordinated the collection of modern seed samples. C.J. B.B. and J.B. performed and analyzed flowering  
511 time and seed set greenhouse experiments. R.S. and W.B. conceived and analyzed root assays. C.S. and  
512 R.S. performed the root assays and seed size phenotyping. C.B. and J.H. sequenced and curated modern  
513 samples. H.A.B. coordinated the collection and analysis of herbarium samples. J.K. coordinated the  
514 extraction of DNA and library preparation of herbarium samples. V.J.S. and E.R. prepared sequencing  
515 libraries from herbarium specimens. C.B. called variants in HPGI. J.H. called variants in mutation  
516 accumulation lines. M.E.A. performed the population and quantitative genomic analyses with supervision  
517 of R.N., C.B. and H.A.B. The paper was written by M.E.A., C.B., H.A.B. and D.W. with comments from  
518 all coauthors.

## 519 **REFERENCES**

- 520 Arunkumar, R., Ness, R.W., Wright, S.I., and Barrett, S.C. (2015). The evolution of selfing is  
521 accompanied by reduced efficacy of selection and purging of deleterious mutations. *Genetics* 199,  
522 817-829.
- 523 Aulchenko, Y.S., Ripke, S., Isaacs, A., and van Duijn, C.M. (2007). GenABEL: an R library for genome-  
524 wide association analysis. *Bioinformatics* 23, 1294-1296.
- 525 Baker, H.G. (1965). Characteristics and modes of origin of weeds. In *The Genetics of Colonizing*  
526 *Species*, H.G. Baker, and G.L. Stebbins, eds. (New York: Academic Press), pp. 147-168.
- 527 Barrett, R.D.H., and Schluter, D. (2008). Adaptation from standing genetic variation. *Trends Ecol Evol*  
528 23, 38-44.

- 529 Barrett, S.C.H. (2014). Foundations of invasion genetics: the Baker and Stebbins legacy. *Mol Ecol* 24,  
530 1927-1941.
- 531 Barrick, J.E., and Lenski, R.E. (2013). Genome dynamics during experimental evolution. *Nat Rev Genet*  
532 14, 827-839.
- 533 Becker, C., Hagemann, J., Müller, J., Koenig, D., Stegle, O., Borgwardt, K., and Weigel, D. (2011).  
534 Spontaneous epigenetic variation in the *Arabidopsis thaliana* methylome. *Nature* 480, 245-249.
- 535 Bentsink, L., Hanson, J., Hanhart, C.J., Blankestijn-de Vries, H., Coltrane, C., Keizer, P., El-Lithy, M.,  
536 Alonso-Blanco, C., de Andres, M.T., Reymond, M., et al. (2010). Natural variation for seed dormancy  
537 in *Arabidopsis* is regulated by additive genetic and molecular pathways. *Proc Natl Acad Sci USA* 107,  
538 4264-4269.
- 539 Bock, D.G., Caseys, C., Cousens, R.D., Hahn, M.A., Heredia, S.M., Hübner, S., Turner, K.G., Whitney,  
540 K.D., and Rieseberg, L.H. (2015). What we still don't know about invasion genetics. *Mol Ecol* 24,  
541 2277-2297.
- 542 Bouckaert, R., Heled, J., Kühnert, D., Vaughan, T., Wu, C.-H., Xie, D., Suchard, M.a., Rambaut, A., and  
543 Drummond, A.J. (2014). BEAST 2: a software platform for Bayesian evolutionary analysis. *PLoS*  
544 *Comp Biol* 10, e1003537.
- 545 Briggs, A.W., Stenzel, U., Johnson, P.L., Green, R.E., Kelso, J., Prüfer, K., Meyer, M., Krause, J., Ronan,  
546 M.T., Lachmann, M., et al. (2007). Patterns of damage in genomic DNA sequences from a  
547 Neandertal. *Proc Natl Acad Sci USA* 104, 14616-14621.
- 548 Briggs, A.W., Stenzel, U., Meyer, M., Krause, J., Kircher, M., and Pääbo, S. (2010). Removal of deaminated  
549 cytosines and detection of in vivo methylation in ancient DNA. *Nucleic Acids Res* 38, e87.
- 550 Brouwer, D.J., and St Clair, D.A. (2004). Fine mapping of three quantitative trait loci for late blight  
551 resistance in tomato using near isogenic lines (NILs) and sub-NILs. *Theor Appl Genet* 108, 628-638.
- 552 Bustamante, C.D., Nielsen, R., Sawyer, S.A., Olsen, K.M., Purugganan, M.D., and Hartl, D.L. (2002). The  
553 cost of inbreeding in *Arabidopsis*. *Nature* 416, 531-534.
- 554 Cao, J., Schneeberger, K., Ossowski, S., Gunther, T., Bender, S., Fitz, J., Koenig, D., Lanz, C., Stegle, O.,  
555 Lippert, C., et al. (2011). Whole-genome sequencing of multiple *Arabidopsis thaliana* populations. *Nat*  
556 *Genet* 43, 956-963.
- 557 Charlesworth, B., and Charlesworth, D. (2010). *Elements of Evolutionary Genetics* (Roberts and  
558 Company: Greenwood Village, CO, 2010).
- 559 Charlesworth, D., and Wright, S.I. (2001). Breeding systems and genome evolution. *Curr Opin Genet*  
560 *Dev* 11, 685-690.

- 561 Choi, K., Zhao, X., Kelly, K.A., Venn, O., Higgins, J.D., Yelina, N.E., Hardcastle, T.J., Ziolkowski, P.A.,  
562 Copenhaver, G.P., Franklin, F.C., et al. (2013). *Arabidopsis* meiotic crossover hot spots overlap with  
563 H2A.Z nucleosomes at gene promoters. *Nat Genet* 45, 1327-1336.
- 564 Crawford, P.H.C., and Hoagland, B.W. (2009). Can herbarium records be used to map alien species  
565 invasion and native species expansion over the past 100 years? *J Biogeography* 36, 651-661.
- 566 Drummond, A.J., Suchard, M.A., Xie, D., and Rambaut, A. (2012). Bayesian phylogenetics with BEAUti  
567 and the BEAST 1.7. *Mol Biol Evol* 29, 1969-1973.
- 568 Fletcher, R.S., Mullen, J.L., Yoder, S., Bauerle, W.L., Reuning, G., Sen, S., Meyer, E., Juenger, T.E., and  
569 McKay, J.K. (2013). Development of a next-generation NIL library in *Arabidopsis thaliana* for  
570 dissecting complex traits. *BMC Genomics* 14, 655.
- 571 Fu, Q., Li, H., Moorjani, P., Jay, F., Slepchenko, S.M., Bondarev, A.A., Johnson, P.L.F., Aximu-Petri, A.,  
572 Prüfer, K., de Filippo, C., et al. (2014). Genome sequence of a 45,000-year-old modern human from  
573 western Siberia. *Nature* 514, 445-449.
- 574 Gauze, G.F. (1934). *The Struggle for Existence* (Baltimore: Williams & Wilkins).
- 575 Gill, M.S., Lemey, P., Faria, N.R., Rambaut, A., Shapiro, B., and Suchard, M.a. (2012). Improving Bayesian  
576 population dynamics inference: a coalescent-based model for multiple loci. *Mol Biol Evol* 30, 713-  
577 724.
- 578 Goldewijk, K.K., and Ramankutty, N. (2004). Land cover change over the last three centuries due to  
579 human activities: The availability of new global data sets. *Geojournal* 61, 335-334.
- 580 Green, R.E., and Shapiro, B. (2013). Human evolution: turning back the clock. *Curr Biol* 23, R286-288.
- 581 Hagmann, J., Becker, C., Müller, J., Stegle, O., Meyer, R.C., Wang, G., Schneeberger, K., Fitz, J., Altmann,  
582 T., Bergelson, J., et al. (2015). Century-scale methylome stability in a recently diverged *Arabidopsis*  
583 *thaliana* lineage. *PLoS Genet* 11, e1004920.
- 584 Halligan, D.L., and Keightley, P.D. (2009). Spontaneous mutation accumulation studies in evolutionary  
585 genetics. *Annu Rev Ecol Evol S* 40, 151-172.
- 586 Hancock, A.M., Brachi, B., Faure, N., Horton, M.W., Jarymowycz, L.B., Sperone, F.G., Toomajian, C.,  
587 Roux, F., and Bergelson, J. (2011). Adaptation to climate across the *Arabidopsis thaliana* genome.  
588 *Science* 334, 83-86.
- 589 Ho, S.Y.W., Phillips, M.J., Cooper, A., and Drummond, A.J. (2005). Time dependency of molecular rate  
590 estimates and systematic overestimation of recent divergence times. *Mol Biol Evol* 22, 1561-1568.
- 591 Hofreiter, M., Jaenicke, V., Serre, D., Haeseler Av, A., and Pääbo, S. (2001). DNA sequences from  
592 multiple amplifications reveal artifacts induced by cytosine deamination in ancient DNA. *Nucleic*  
593 *Acids Res* 29, 4793-4799.

- 594 Hu, T.T., Pattyn, P., Bakker, E.G., Cao, J., Cheng, J.F., Clark, R.M., Fahlgren, N., Fawcett, J.A., Grimwood,  
595 J., Gundlach, H., et al. (2011). The *Arabidopsis lyrata* genome sequence and the basis of rapid genome  
596 size change. *Nat Genet* 43, 476-481.
- 597 Hudson, R.R., and Kaplan, N.L. (1985). Statistical properties of the number of recombination events in  
598 the history of a sample of DNA sequences. *Genetics* 111, 147-164.
- 599 Huson, D.H., and Bryant, D. (2006). Application of phylogenetic networks in evolutionary studies. *Mol*  
600 *Biol Evol* 23, 254-267.
- 601 Jiang, C., Mithani, A., Belfield, E.J., Mott, R., Hurst, L.D., and Harberd, N.P. (2014). Environmentally  
602 responsive genome-wide accumulation of de novo *Arabidopsis thaliana* mutations and epimutations.  
603 *Genome Res* 24, 1821-1829.
- 604 Jombart, T. (2008). adegenet: a R package for the multivariate analysis of genetic markers. *Bioinformatics*  
605 24, 1403-1405.
- 606 Keightley, P.D., and Eyre-Walker, A. (2007). Joint inference of the distribution of fitness effects of  
607 deleterious mutations and population demography based on nucleotide polymorphism frequencies.  
608 *Genetics* 177, 2251-2261.
- 609 Keurentjes, J.J., Bentsink, L., Alonso-Blanco, C., Hanhart, C.J., Blankestijn-De Vries, H., Effgen, S.,  
610 Vreugdenhil, D., and Koornneef, M. (2007). Development of a near-isogenic line population of  
611 *Arabidopsis thaliana* and comparison of mapping power with a recombinant inbred line population.  
612 *Genetics* 175, 891-905.
- 613 Kim, S., Choi, H.I., Ryu, H.J., Park, J.H., Kim, M.D., and Kim, S.Y. (2004). ARIA, an *Arabidopsis* arm  
614 repeat protein interacting with a transcriptional regulator of abscisic acid-responsive gene  
615 expression, is a novel abscisic acid signaling component. *Plant Physiol* 136, 3639-3648.
- 616 Kimura, M. (1967). On the evolutionary adjustment of spontaneous mutation rates. *Genet Res* 9, 23.
- 617 Kircher, M. (2012). Analysis of high-throughput ancient DNA sequencing data. *Methods Mol Biol* 840,  
618 197-228.
- 619 Kong, A., Frigge, M.L., Masson, G., Besenbacher, S., Sulem, P., Magnusson, G., Gudjonsson, S.a.,  
620 Sigurdsson, A., Jonasdottir, A., Jonasdottir, A., et al. (2012). Rate of de novo mutations and the  
621 importance of father's age to disease risk. *Nature* 488, 471-475.
- 622 Krause, J., Briggs, A.W., Kircher, M., Maricic, T., Zwyns, N., Derevianko, A., and Pääbo, S. (2010). A  
623 complete mtDNA genome of an early modern human from Kostenki, Russia. *Curr Biol* 20, 231-236.
- 624 Lankau, R.A., Nuzzo, V., Spyreasa, G., and Davisc, A.S. (2009). Evolutionary limits ameliorate the  
625 negative impact of an invasive plant. *Proc Natl Acad Sci USA* 107, 1253.
- 626 Lee, C.E. (2002). Evolutionary genetics of invasive species. *Trends Ecol Evol* 17, 386-391.

- 627 Librado, P., and Rozas, J. (2009). DnaSP v5: a software for comprehensive analysis of DNA  
628 polymorphism data. *Bioinformatics* 25, 1451-1452.
- 629 Lipson, M., Loh, P.R., Sankararaman, S., Patterson, N., Berger, B., and Reich, D. (2015). Calibrating the  
630 Human Mutation Rate via Ancestral Recombination Density in Diploid Genomes. *PLoS Genet* 11,  
631 e1005550.
- 632 Lundemo, S., Falahati-Anbaran, M., and Stenøien, H.K. (2009). Seed banks cause elevated generation  
633 times and effective population sizes of *Arabidopsis thaliana* in northern Europe. *Mol Ecol* 18, 2798-  
634 2811.
- 635 Markakis, M.N., Boron, A.K., Van Loock, B., Saini, K., Cirera, S., Verbelen, J.P., and Vissenberg, K. (2013).  
636 Characterization of a small auxin-up RNA (SAUR)-like gene involved in *Arabidopsis thaliana*  
637 development. *PLoS One* 8, e82596.
- 638 Maron, J.L., Vilà, M., Bommarco, R., Elmendorf, S., and Beardsley, P. (2004). Rapid evolution of an  
639 invasive plant. *Ecol Monogr* 74, 261-280.
- 640 Martin, M.D., Cappellini, E., Samaniego, J.A., Zepeda, M.L., Campos, P.F., Seguin-Orlando, A., Wales, N.,  
641 Orlando, L., Ho, S.Y., Dietrich, F.S., et al. (2013). Reconstructing genome evolution in historic  
642 samples of the Irish potato famine pathogen. *Nat Commun* 4, 2172.
- 643 Meyer, M., and Kircher, M. (2010). Illumina sequencing library preparation for highly multiplexed target  
644 capture and sequencing. *Cold Spring Harb Protoc* 2010, pdb prot5448.
- 645 Montesinos, A., Tonsor, S.J., Alonso-Blanco, C., and Picó, F.X. (2009). Demographic and genetic patterns  
646 of variation among populations of *Arabidopsis thaliana* from contrasting native environments. *PLoS*  
647 *One* 4, e7213.
- 648 Nachman, M.W., and Crowell, S.L. (2000). Estimate of the mutation rate per nucleotide in humans.  
649 *Genetics* 156, 297-304.
- 650 Ness, R.W., Morgan, A.D., Vasanthakrishnan, R.B., Colegrave, N., and Keightley, P.D. (2015). Extensive  
651 de novo mutation rate variation between individuals and across the genome of *Chlamydomonas*  
652 *reinhardtii*. *Genome Res.*
- 653 Ness, R.W., Wright, S.I., and Barrett, S.C. (2010). Mating-system variation, demographic history and  
654 patterns of nucleotide diversity in the tristylous plant *Eichhornia paniculata*. *Genetics* 184, 381-392.
- 655 Nordborg, M., Hu, T.T., Ishino, Y., Jhaveri, J., Toomajian, C., Zheng, H., Bakker, E., Calabrese, P.,  
656 Gladstone, J., Goyal, R., et al. (2005). The pattern of polymorphism in *Arabidopsis thaliana*. *PLoS Biol*  
657 3, e196.
- 658 Orlando, L., Gilbert, M.T., and Willerslev, E. (2015). Reconstructing ancient genomes and epigenomes.  
659 *Nat Rev Genet* 16, 395-408.

- 660 Ossowski, S., Schneeberger, K., Lucas-Lledo, J.I., Warthmann, N., Clark, R.M., Shaw, R.G., Weigel, D.,  
661 and Lynch, M. (2010). The rate and molecular spectrum of spontaneous mutations in *Arabidopsis*  
662 *thaliana*. *Science* 327, 92-94.
- 663 Platt, A., Horton, M., Huang, Y.S., Li, Y., Anastasio, A.E., Mulyati, N.W., Agren, J., Bossdorf, O., Byers, D.,  
664 Donohue, K., et al. (2010). The scale of population structure in *Arabidopsis thaliana*. *PLoS Genet* 6,  
665 e1000843.
- 666 Prüfer, K., and Meyer, M. (2015). Comment on "Late Pleistocene human skeleton and mtDNA link  
667 Paleamericans and modern Native Americans". *Science* 347, 835.
- 668 Roach, J.C., Glusman, G., Smit, A.F., Huff, C.D., Hubley, R., Shannon, P.T., Rowen, L., Pant, K.P.,  
669 Goodman, N., Bamshad, M., et al. (2010). Analysis of genetic inheritance in a family quartet by  
670 whole-genome sequencing. *Science* 328, 636-639.
- 671 Sax, D.F., Stachowicz, J.J., Brown, J.H., Bruno, J.F., Dawson, M.N., Gaines, S.D., Grosberg, R.K., Hastings,  
672 A., Holt, R.D., Mayfield, M.M., et al. (2007). Ecological and evolutionary insights from species  
673 invasions. *Trends Ecol Evol* 22, 465-471.
- 674 Scally, A., and Durbin, R. (2012). Revising the human mutation rate: implications for understanding  
675 human evolution. *Nat Rev Genet* 13, 745-753.
- 676 Schneeberger, K., Hagemann, J., Ossowski, S., Warthmann, N., Gesing, S., Kohlbacher, O., and Weigel, D.  
677 (2009). Simultaneous alignment of short reads against multiple genomes. *Genome Biol* 10, R98.
- 678 Séguérel, L., Wyman, M.J., and Przeworski, M. (2014). Determinants of mutation rate variation in the  
679 human germline. *Annu Rev Genomics Hum Genet* 15, 47-70.
- 680 Shapiro, B., and Hofreiter, M. (2014). A paleogenomic perspective on evolution and gene function: new  
681 insights from ancient DNA. *Science* 343, 1236573.
- 682 Shaw, R.G., Byers, D.L., and Darmo, E. (2000). Spontaneous mutational effects on reproductive traits of  
683 *Arabidopsis thaliana*. *Genetics* 155, 369-378.
- 684 Sniegowski, P.D., Gerrish, P.J., and Lenski, R.E. (1997). Evolution of high mutation rates in experimental  
685 populations of *E. coli*. *Nature* 387, 703-705.
- 686 Spartz, A.K., Lee, S.H., Wenger, J.P., Gonzalez, N., Itoh, H., Inze, D., Peer, W.A., Murphy, A.S.,  
687 Overvoorde, P.J., and Gray, W.M. (2012). The SAUR19 subfamily of SMALL AUXIN UP RNA genes  
688 promote cell expansion. *Plant J* 70, 978-990.
- 689 Staats, M., Erkens, R.H.J., van de Vossenbergh, B., Wieringa, J.J., Kraaijeveld, K., Stielow, B., Geml, J.,  
690 Richardson, J.E., and Bakker, F.T. (2013). Genomic treasure troves: complete genome sequencing of  
691 herbarium and insect museum specimens. *PLoS ONE* 8, e69189.

- 692 Stec, A.O., Bhaskar, P.B., Bolon, Y.T., Nolan, R., Shoemaker, R.C., Vance, C.P., and Stupar, R.M. (2013).  
693 Genomic heterogeneity and structural variation in soybean near isogenic lines. *Front Plant Sci* 4,  
694 104.
- 695 Subramanian, S., and Kumar, S. (2003). Neutral substitutions occur at a faster rate in exons than in  
696 noncoding DNA in primate genomes. *Genome Res* 13, 838-844.
- 697 Subramanian, S., and Lambert, D.M. (2011). Time dependency of molecular evolutionary rates? Yes and  
698 no. *Genome Biology and Evolution* 3, 1324-1328.
- 699 Swarup, K., Alonso-Blanco, C., Lynn, J.R., Michaels, S.D., Amasino, R.M., Koornneef, M., and Millar, A.J.  
700 (1999). Natural allelic variation identifies new genes in the *Arabidopsis* circadian system. *Plant J* 20,  
701 67-77.
- 702 Szalma, S.J., Hostert, B.M., Ledeaux, J.R., Stuber, C.W., and Holland, J.B. (2007). QTL mapping with near-  
703 isogenic lines in maize. *Theor Appl Genet* 114, 1211-1228.
- 704 Tajima, F. (1989). Statistical method for testing the neutral mutation hypothesis by DNA polymorphism.  
705 *Genetics* 123, 585-595.
- 706 Templeton, A.R., Sing, C.F., Kessling, A., and Humphries, S. (1988). A Cladistic-Analysis of Phenotype  
707 Associations with Haplotypes Inferred from Restriction Endonuclease Mapping .2. The Analysis of  
708 Natural-Populations. *Genetics* 120, 1145-1154.
- 709 van Kleunen, M., Dawson, W., Essl, F., Pergl, J., Winter, M., Weber, E., Kreft, H., Weigelt, P., Kartesz, J.,  
710 Nishino, M., et al. (2015). Global exchange and accumulation of non-native plants. *Nature* 525, 100-  
711 103.
- 712 Vandepitte, K., de Meyer, T., Helsen, K., van Acker, K., Roldán-Ruiz, I., Mergeay, J., and Honnay, O.  
713 (2014). Rapid genetic adaptation precedes the spread of an exotic plant species. *Mol Ecol* 23, 2157-  
714 2164.
- 715 Watterson, G.A. (1975). On the number of segregating sites in genetical models without recombination.  
716 *Theor Pop Biol* 7, 256-276.
- 717 Weigel, D. (2012). Natural variation in *Arabidopsis*: from molecular genetics to ecological genomics.  
718 *Plant Physiol* 158, 2-22.
- 719 Weiss, C.L., Dannemann, M., Prufer, K., and Burbano, H.A. (2015). Contesting the presence of wheat in  
720 the British Isles 8,000 years ago by assessing ancient DNA authenticity from low-coverage data. *eLife*  
721 4.
- 722 Weiß, C.L., Schuenemann, V.J., Devos, J., Shirsekar, G., Reiter, E., Gould, B.A., Stinchcombe, J.R., Krause,  
723 J., and Burbano, H.A. (2015). Temporal patterns of damage and decay kinetics of DNA retrieved  
724 from plant herbarium specimens. bioRxiv <http://dx.doi.org/10.1101/023135>.

- 725 Wright, S.I., Ness, R.W., Foxe, J.P., and Barret, S.C.H. (2008). Genomic consequences of outcrossing and  
726 selfing in plants. *Int J Plant Sci* 169, 105-118.
- 727 Xie, X., Song, M.H., Jin, F., Ahn, S.N., Suh, J.P., Hwang, H.G., and McCouch, S.R. (2006). Fine mapping of  
728 a grain weight quantitative trait locus on rice chromosome 8 using near-isogenic lines derived from a  
729 cross between *Oryza sativa* and *Oryza rufipogon*. *Theor Appl Genet* 113, 885-894.
- 730 Yoshida, K., Schuenemann, V.J., Cano, L.M., Pais, M., Mishra, B., Sharma, R., Lanz, C., Martin, F.N.,  
731 Kamoun, S., Krause, J., et al. (2013). The rise and fall of the *Phytophthora infestans* lineage that  
732 triggered the Irish potato famine. *eLife* 2, e00731.
- 733 Zhang, H., Tang, K., Qian, W., Duan, C.G., Wang, B., Zhang, H., Wang, P., Zhu, X., Lang, Z., Yang, Y., et  
734 al. (2014). An Rrp6-like protein positively regulates noncoding RNA levels and DNA methylation in  
735 *Arabidopsis*. *Mol Cell* 54, 418-430.



736 **TABLE**

737 **Table I. Genic SNPs associated with different traits.**

738 Most SNPs first appeared in sample JK2530 collected 1922 in Indiana. For non-synonymous SNPs, the amino acid  
 739 transition and the Grantham score (ranging from 0 to 215) are reported. All SNPs in the table were significant ( $p <$   
 740 0.05) after raw p-values were permutation corrected. # highlights those whose permutation corrected p-values  
 741 were still significant when the threshold was corrected by multiple traits ( $p < 0.002$ ). \* indicates SNPs when raw p-  
 742 values passed the threshold corrected by multiple SNP correction as well as multiple trait correction ( $p < 0.0001$ ).  
 743 See Table S4 for details on phenotypes and climatic variables, and Table S5 for information on all significant SNPs.

| Trait† | Location (chr-bp) | Gene      | Anno-tation | Protein                                          | aa change | Multiple testing |
|--------|-------------------|-----------|-------------|--------------------------------------------------|-----------|------------------|
| G      | 1-958,948         | AT1G03810 | nonsyn      | Oligonucleotide/<br>oligosaccharide binding fold | A>P, 27   |                  |
| D      | 1-13,994,958      | AT1G36933 | transposon  | Copia                                            |           |                  |
| S      | 1-20,324,050      | AT1G54440 | intronic    | RRP6-LIKE I                                      |           | ##*              |
| D      | 1-23,648,407      | AT1G63740 | nonsyn      | TIR-NLR family                                   | Y>S, 144  |                  |
| G      | 2-358,395         | AT2G01820 | syn         | RLK family                                       |           | *                |
| G      | 2-585,918         | AT2G02220 | syn         | PSKR1                                            |           | *                |
| G      | 2-6,034,545       | AT2G14247 | syn         | Expressed protein                                |           | *                |
| G      | 2-7,047,529       | AT2G16270 | nonsyn      | Unknown protein                                  | P>A, 27   | *                |
| G      | 2-7,186,220       | AT2G16580 | intronic    | SAUR8                                            |           | *                |
| G      | 2-10,495,275      | AT2G24680 | intronic    | B3 family                                        |           | *                |
| G      | 2-12,415,084      | AT2G28900 | intronic    | OEPI6                                            |           |                  |
| S      | 2-16,039,488      | AT2G38290 | 3' UTR      | AMT2                                             |           | ##*              |
| S      | 2-16,247,290      | AT2G38910 | nonsyn      | CPK20                                            | A>G, 60   | ##*              |
| G      | 2-16,333,662      | AT2G39160 | nonsyn      | Unknown protein                                  | A>G, 60   |                  |
| G      | 3-2,500,258       | AT3G07830 | syn         | PGA3                                             |           | *                |
| G      | 3-3,629,794       | AT3G11530 | intronic    | VPS55                                            |           | *                |
| G      | 3-4,269,626       | AT3G13229 | 5' UTR      | DUF868 domain                                    |           | *                |
| D      | 3-11,873,293      | AT3G30219 | transposon  | Gypsy                                            |           |                  |
| G & D  | 4-4,228,138       | AT4G07440 | transposon  | Oligonucleotide/<br>oligosaccharide binding fold |           |                  |
| G & D  | 4-9,046,942       | AT4G15960 | nonsyn      | alpha/beta-hydrolase<br>superfamily              | A>Q, 24   |                  |
| G & D  | 4-15,646,341      | AT4G32410 | syn         | ANY1                                             |           |                  |
| G      | 4-15,845,001      | AT4G32840 | 3' UTR      | PFK6                                             |           |                  |
| D      | 5-4,245,213       | AT5G13260 | syn         | Unknown protein                                  |           |                  |

|   |              |           |            |                       |          |
|---|--------------|-----------|------------|-----------------------|----------|
| D | 5-4,500,202  | AT5G13950 | nonsyn     | Unknown protein       | A>G, 60  |
| G | 5-4,797,923  | AT5G14830 | transposon | Retrotransposon       |          |
| G | 5-6,508,329  | AT5G19330 | nonsyn     | ARIA                  | C>W, 215 |
| G | 5-11,090,365 | AT5G29037 | transposon | Gypsy                 |          |
| G | 5-12,312,975 | AT5G32630 | pseudogene | –                     |          |
| G | 5-12,358,159 | AT5G32825 | transposon | CACTA                 |          |
| S | 16024197     | AT5G40020 | intronic   | thaumatin superfamily | ##*      |

744 †Traits with significant associations were root gravitropism (G), root size (S), or summer precipitation,  
745 related to drought conditions (D).

746 **FIGURES**

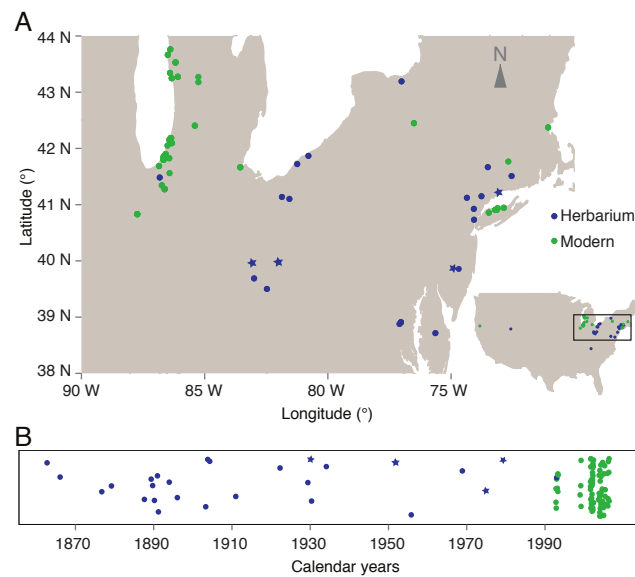

747

748 **Figure I. Geographic location and temporal distribution of HPGI samples.**

749 **(A)** Sampling location of herbarium specimens (blue) and modern individuals (green). **(B)** Temporal  
750 distribution of samples (randomly jittered in a y axis for visualization). Stars indicate four herbarium  
751 accessions that nest in the clade of modern accessions. See Fig. 3.

752 See also Figure S1.

753

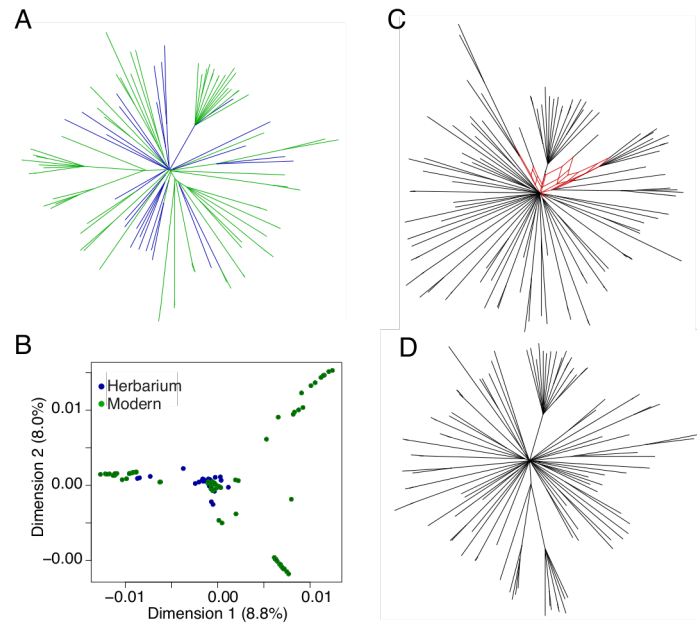

754

755 **Figure 2. Relationship among herbarium and modern HPGI samples.**

756 **(A)** Neighbor-joining tree. Consensus of 1,000 bootstrap replicates. Branch lengths indicate number of  
757 base substitutions. **(B)** First two dimensions of a multidimensional scaling plot based on pairwise  
758 identity-by-state distances. Fraction of variance explained given in parentheses. Phylogenetic network of  
759 all samples using the parsimony splits algorithm, before **(C)** and after **(D)** removing intra-HPGI  
760 recombinants.

761 See also Figure S2.

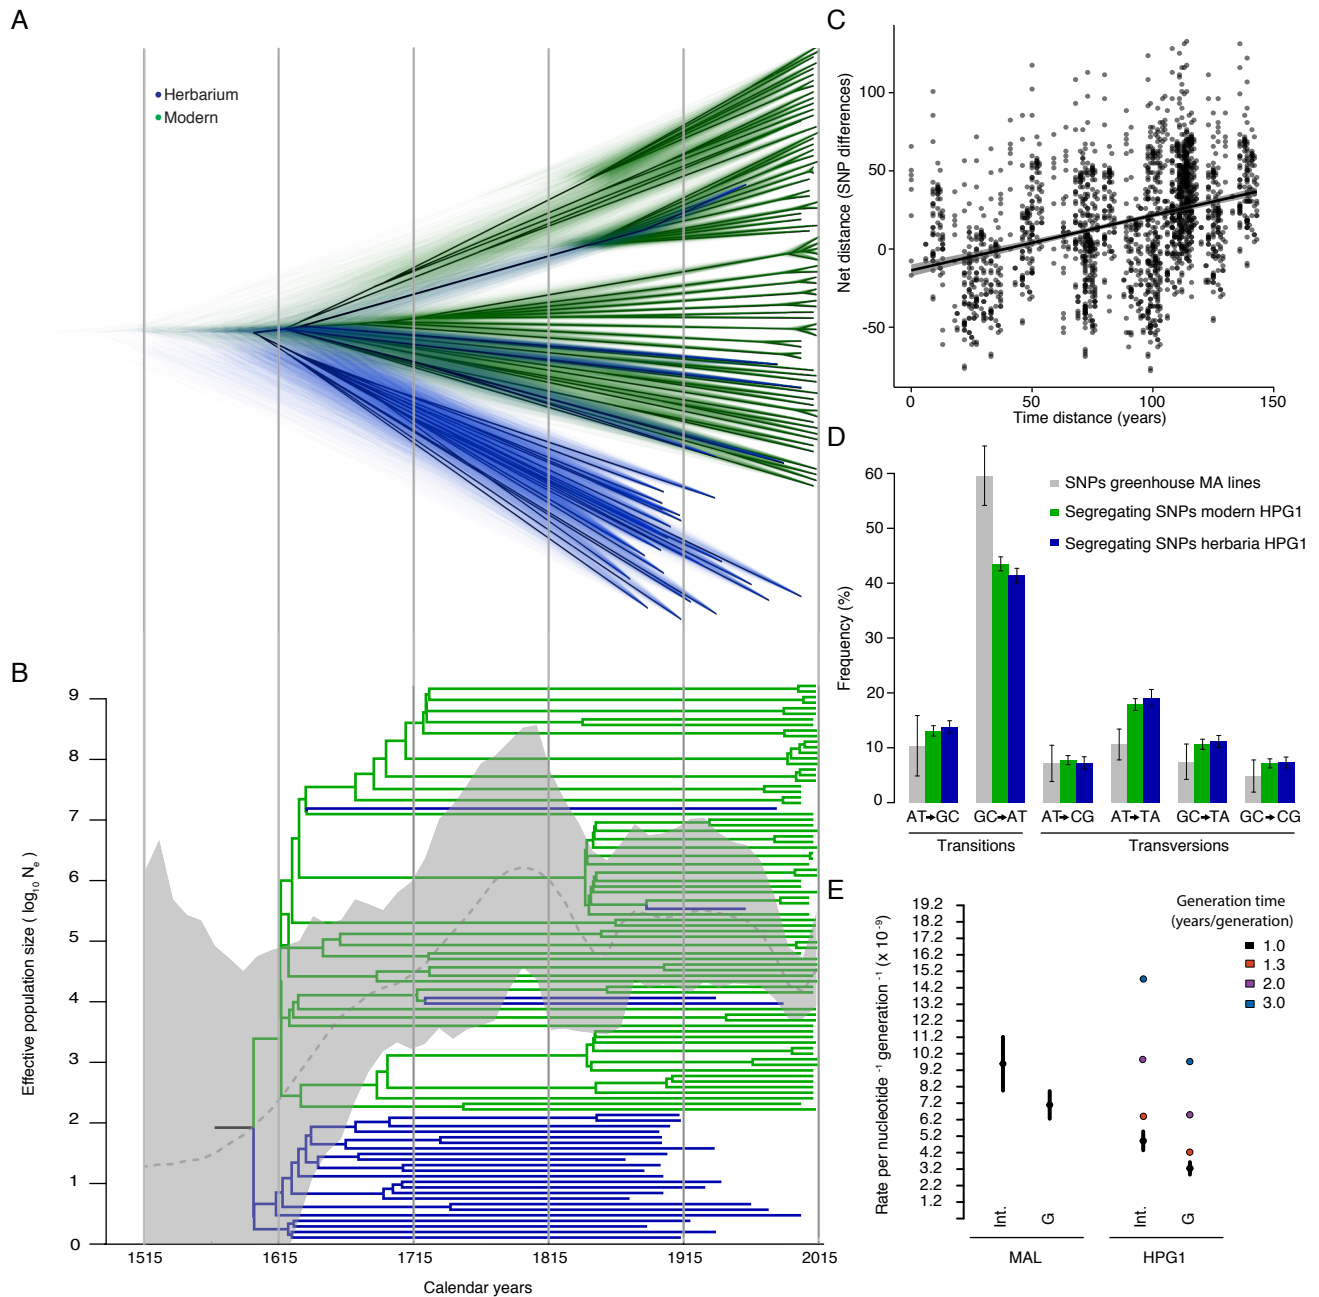

762

763 **Figure 3. Substitution rates and demographic history.**

764 **(A)** Bayesian phylogenetic analyses employing tip-calibration methodology. All 10,000 trees were  
 765 superimposed as transparent lines, and the most common topology was plotted solid. Tree branches  
 766 were calibrated with their corresponding collecting dates. **(B)** Maximum Clade Credibility (MCC) tree  
 767 summarizing the trees in (A). The demographic model underlying the phylogenetic analysis is  
 768 superimposed on the MCC tree.  $N_e$  was estimated by Bayesian Skygrid reconstruction; the mean  $N_e$   
 769 over time is shown as a dotted line and the 95% highest posterior density is shaded grey. **(C)**

770 Regression between pairwise net genetic and time distances. The slope of the linear regression line  
771 corresponds to the whole-genome substitution rate per year. **(D)** Substitution spectra in HPGI  
772 samples, compared to greenhouse-grown mutation accumulation (MA) lines. **(E)** Comparison of  
773 mutation rates between greenhouse-grown MA Lines (MALs) and HPGI. 95% confidence intervals from  
774 bootstrap resampling using regression approach from C are shown (see Table S3 for specific values).  
775 See also Figures S3 and S5.

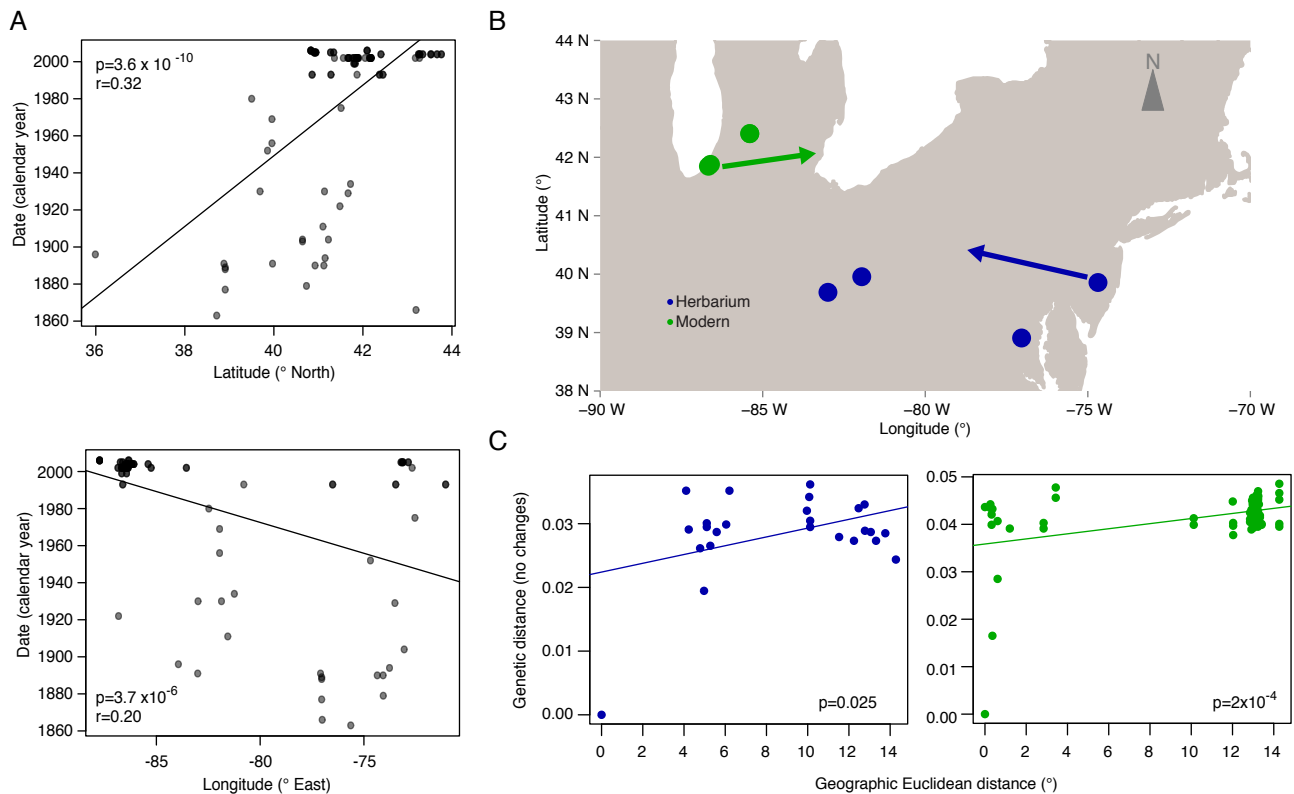

776

777 **Figure 4. Migration dynamics of HPG I.**

778 **(A)** Linear regression of longitude and latitude as a function of collection year. The p-value was  
779 obtained from the t-test of the slope. **(B)** Origin of herbarium and modern geographic spread,  
780 determined using separate heuristic searches of isolation-by-distance patterns. Three locations of  
781 modern samples and four of herbarium samples showed significant slope ( $p < 0.05$ ) in the isolation-by-  
782 distance pattern. That is, genetic distance increased when moving apart from those geographic locations.  
783 For one sample of each subset a likely migration trajectory is depicted by an arrow. **(C)** Isolation-by-  
784 distance patterns of the herbarium (left) and modern (right) samples from which the hypothetical  
785 trajectory in (C) was inferred.

786 See also Figure S5.

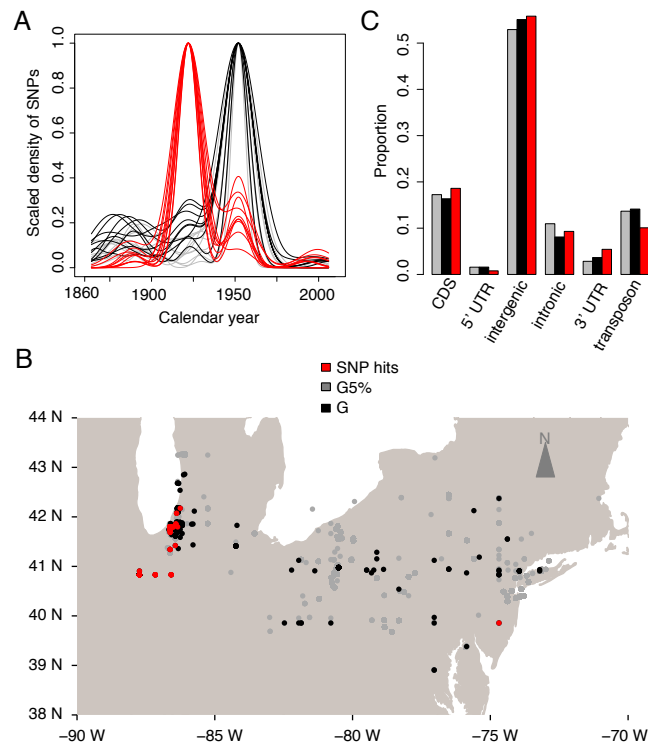

787

788 **Figure 5. Spatial and temporal emergence of mutations associated with root**  
789 **morphology phenotypes and/or climate variables.**

790 **(A)** Age distribution of the oldest herbarium sample with the derived allele of each SNP with a  
791 significant trait association, compared with genome-wide SNPs with at least 5% minor allele frequency  
792 (black), or without frequency cutoff (grey). **(B)** Spatial centroid of all samples carrying derived-allele  
793 SNPs shown in (A).

794 See also Figures S4 and S6.

795



## 1 **SUPPLEMENTAL INFORMATION FOR**

### 2 Exposito-Alonso, Becker et al.: **THE RATE AND EFFECT OF DE NOVO** 3 **MUTATIONS IN NATURAL POPULATIONS OF ARABIDOPSIS** 4 **THALIANA**

#### 5 **Supplemental Tables**

6 Tables S1 to S5 in file Exposito-Alonso\_2016\_TABLES\_S1\_to\_S5.xlsx

7 Table S1. Sample information. Related to Figure 1.

8 Table S2. Sample information for greenhouse-grown mutation accumulation lines. Related to Figure 3.

9 Table S3. Mutation rate estimates for different annotations in HPGI and greenhouse-grown mutation  
10 accumulation lines. Related to Figure 3.

11 Table S4. Description of phenotypic and climatic variables for association analyses. Related to Figure 5.

12 Table S5. SNP hits from association analyses. Related to Table 1.

13 Table S6. Trait distributions and QQ plots of association analyses. Related to Figure 5.

14 For each trait employed in association analyses, we report the histogram distribution and the  
15 QQ plot of p-values to ensure that no trait departs exaggeratedly from the normal  
16 distribution, and that no inflation of p-values is observed (when  $\lambda \leq 1$ , there is no  
17 inflation of false positives).

#### 18 19 **Supplemental Figures**

20 Figure S1. Ancient-DNA-like characteristics of herbarium-derived libraries not treated with uracil  
21 glycosylase. Related to Figure 1.

22 Figure S2. Separation between HPGI and other North American lineages. Related to Figure 2.

23 Figure S3. Substitution spectrum and relationship between methylation and substitutions. Related to  
24 Figure 3

25 Figure S4. Density of SNPs along all chromosomes and location of SNP hits. Related to Figure 5.

26 Figure S5. Bayesian phylogeographic inference using continuous trait models, and HPGI genetic diversity  
27 in time and space. Related to Figure 4.

28 Figure S6. Linkage disequilibrium and SNPs with significant trait associations and correlations between  
29 SNP effects, frequency and age. Related to Figure 5.

#### 30 31 **Supplemental Experimental Procedures**

#### 32 **Supplemental References**

### 33 **SUPPLEMENTAL TABLES**

34 See separate .xlsx file for Tables S1-5 and separate .pdf file for Graphic Table S6.

35 **SUPPLEMENTAL FIGURES**

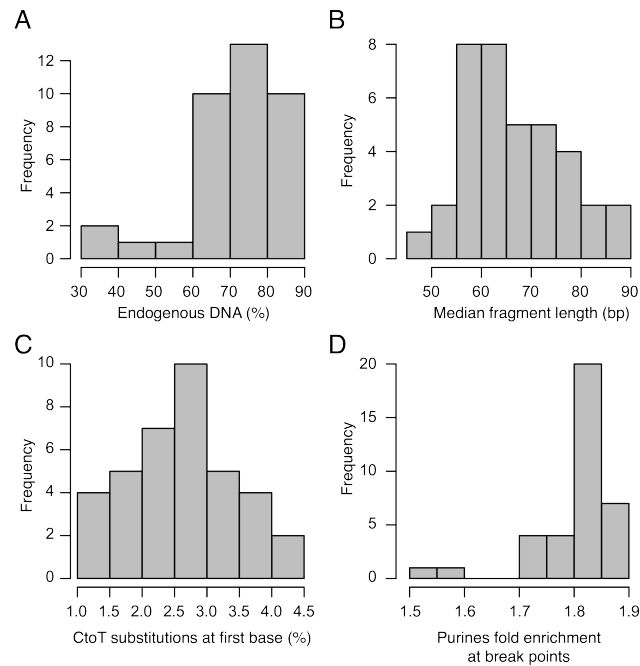

36

37 **Figure S1. Ancient DNA-like characteristics of herbarium-derived libraries not**  
38 **treated with uracil glycosylase.**

39 **(A)** Percentage of *Arabidopsis thaliana* endogenous DNA. **(B)** Median length of merged reads. **(C)**  
40 Percentage of cytosine to thymine (C-to-T) substitutions at first base (5' end). **(D)** Relative enrichment  
41 of purines (adenine and guanine) at 5' end breaking points. Position -1 is compared with position -5.  
42 Numbers indicate genomic context before upstream reads' 5' end.

43 Related to Figure 1.

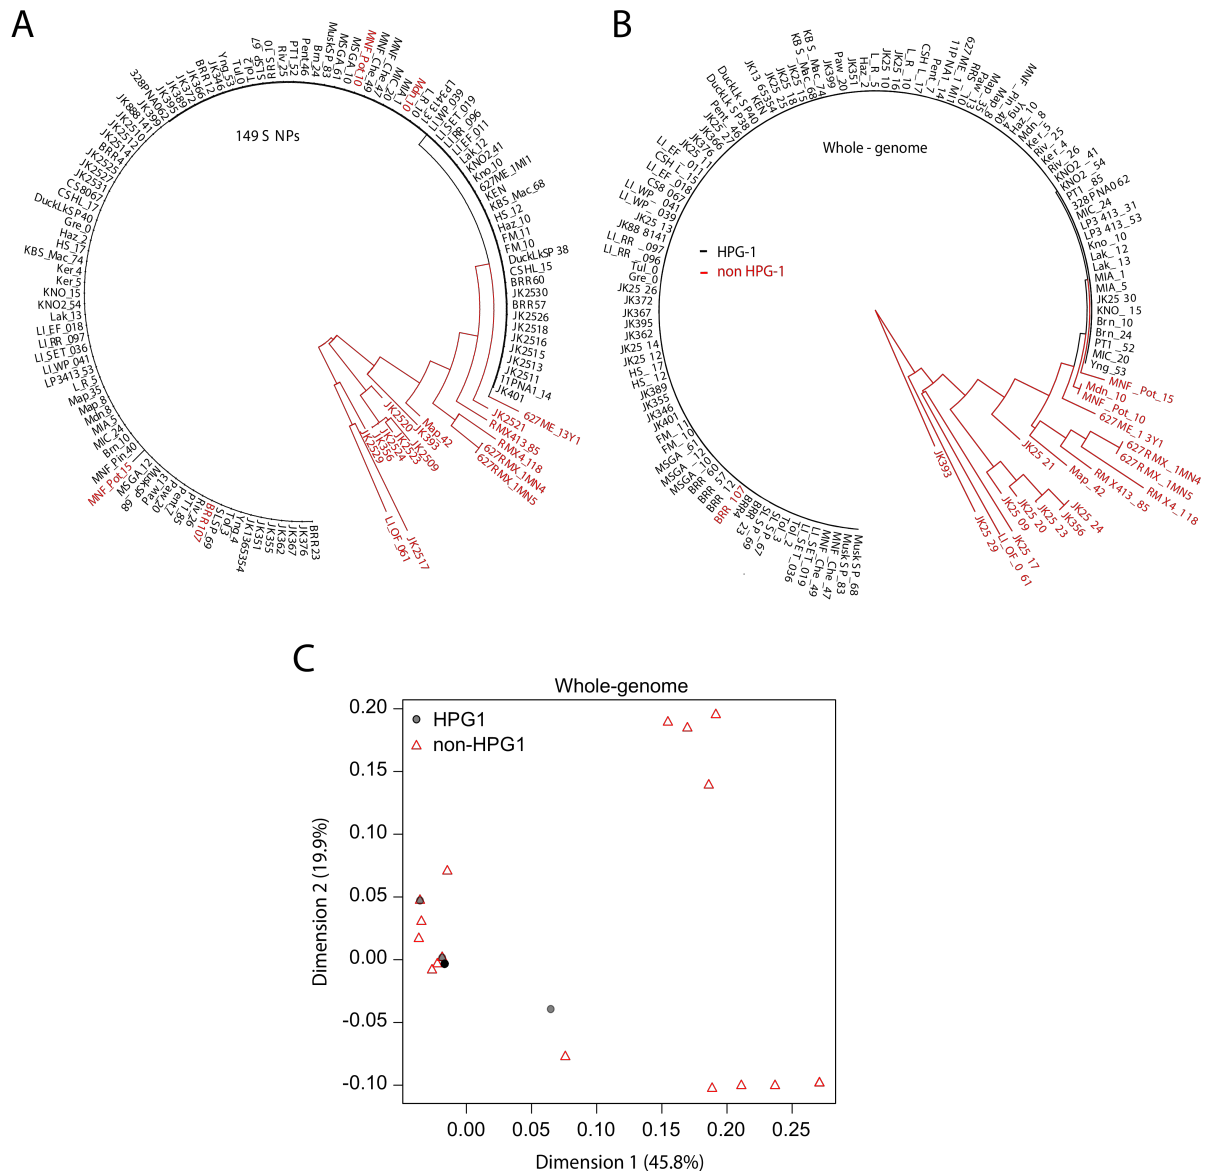

44  
 45 **Figure S2. Separation between HPGI and other North American lineages.**  
 46 **(A)** Neighbor-joining tree built using Illumina-based SNP calls at the 149 genotyping markers originally  
 47 used to identify HPGI candidates (consensus of 1,000 replicates). HPGI accessions are shown in black,  
 48 whereas other North American lineages are depicted in red. **(B)** Neighbor-joining tree based on  
 49 genome-wide SNPs (Consensus of 1,000) replicates. Accessions colored as in (A). Note that three  
 50 accessions originally classified as HPGI based on 149 SNPs (A) are placed outside this clade. A further  
 51 accession (BRRR7) within the HPGI main branch turned out to be a recombinant that was removed  
 52 from the analysis. **(C)** First two dimensions of a multidimensional scaling plot based on the identity by  
 53 state pairwise distances. Notice that the black dot arises as a result of plotting multiple almost-identical

- 54 HPGI grey dots. Numbers between parentheses indicate the percentage of the variance explained by  
55 each dimension.  
56 Related to Figure 2.

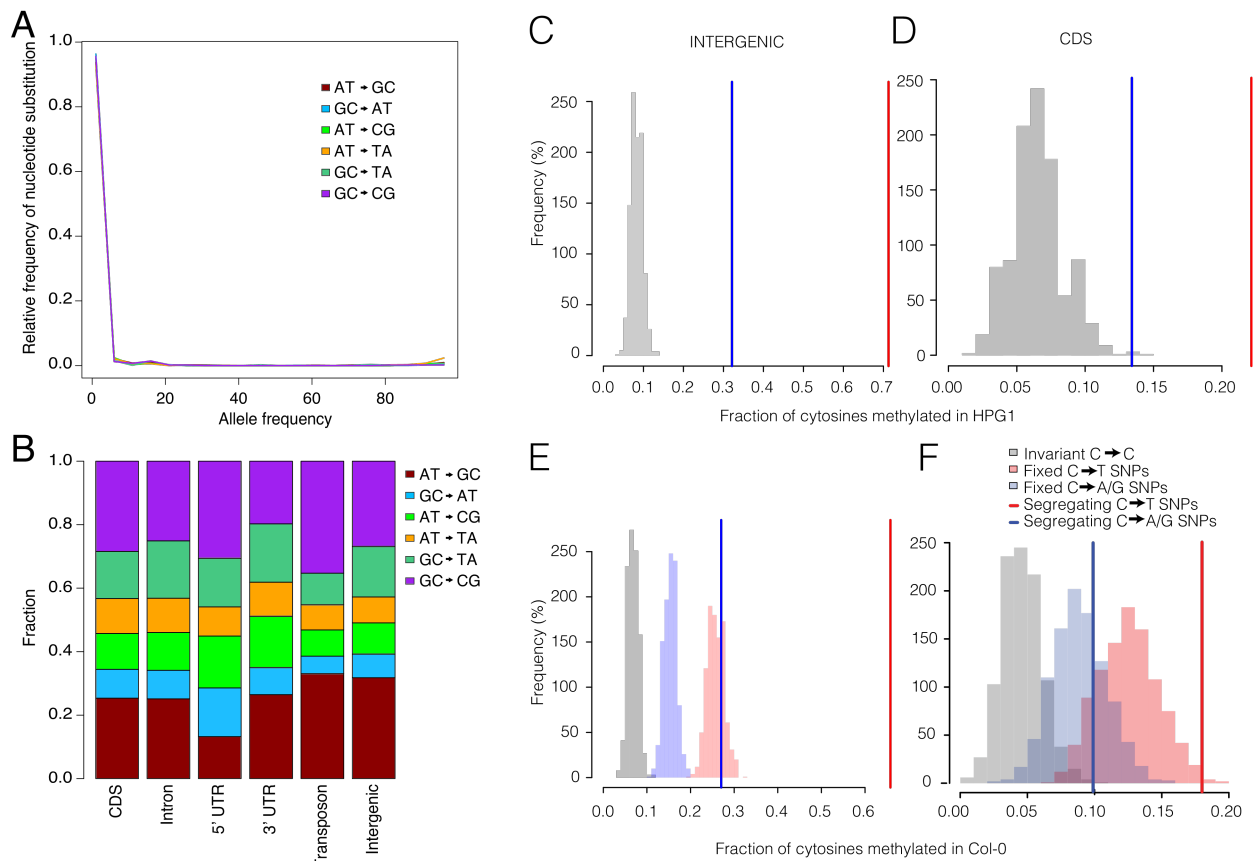

57  
58 **Figure S3. Substitution spectrum and relationship between methylation and**  
59 **substitutions.**

60 **(A)** “Unfolded” site frequency spectrum using *Arabidopsis lyrata* as outgroup for all transitions and  
61 transversions. **(B)** Substitution spectrum for all transitions and transversions divided by genomic  
62 annotation. **(C, D)** Fraction of intergenic SNPs **(C)** and coding sequence (CDS) SNPs **(D)** that  
63 correspond to methylated cytosines in the HPG-I pseudo-reference. Methylation data was taken from  
64 (Hagmann et al., 2015). **(E, F)** Fraction of intergenic **(E)** and CDS SNPs **(F)** that correspond to  
65 methylated cytosines in the Col-0 reference genome (methylation data from (Becker et al., 2011)). Blue  
66 and red lines indicate fractions for SNPs segregating within the HPGI population. Red and blue  
67 histograms indicate fractions for subsets of SNPs fixed within the HPGI population. Grey histograms  
68 indicate fractions for invariant positions, i.e., cytosines that have not undergone substitution. See  
69 Extended Experimental Procedures for details.

70 Related to Figure 3.

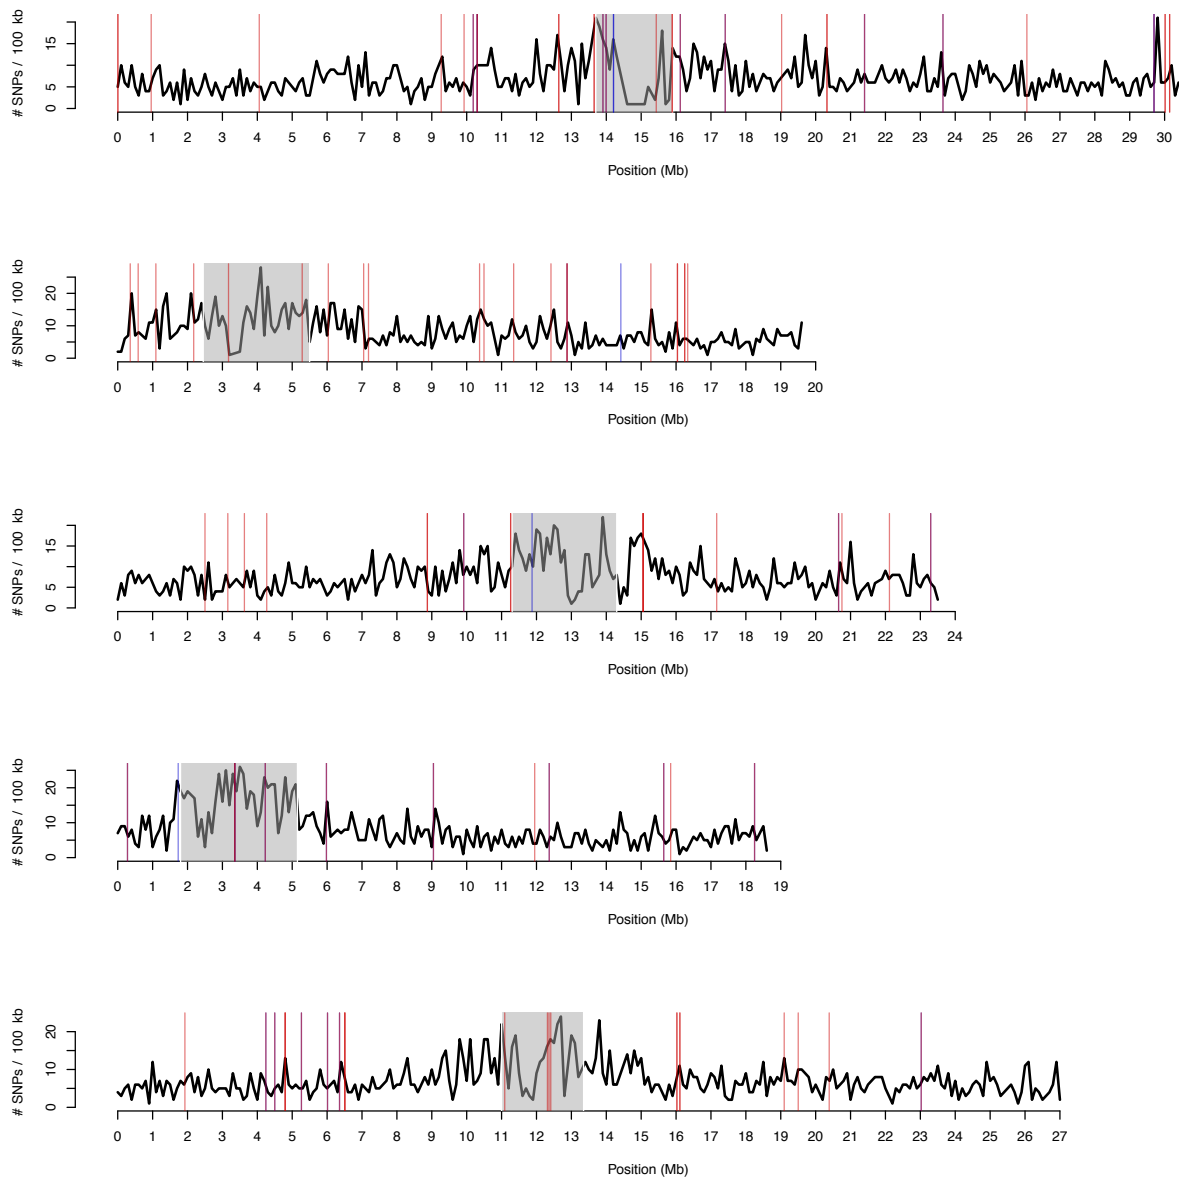

71  
72 **Figure S4. Density of SNPs along all chromosomes and location of SNP hits.**  
73 The line shows the number of SNPs per 100 kb window. Centromere locations are indicated by grey  
74 background. Vertical lines indicate SNPs associated with root phenotypes (red) and climatic variables  
75 (blue).  
76 Related to Figure 5.  
77  
78

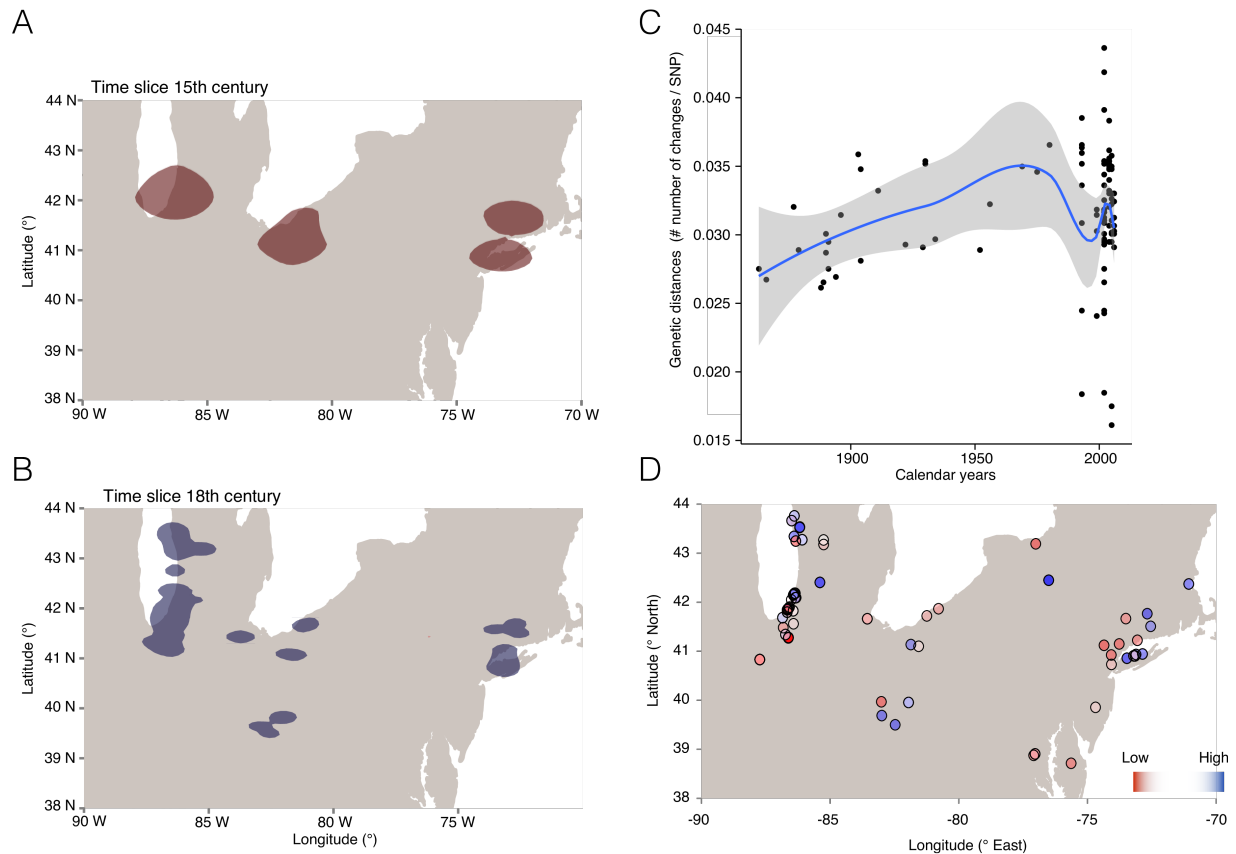

79  
80 **Figure S5. Bayesian phylogeographic inference using continuous trait models, and**  
81 **HPGI genetic diversity in time and space.**  
82 **(A, B)** The model infers the most probable geographic location of each of the nodes of the phylogeny  
83 in Figure 3. **(A)** Ancestral distribution map summarizing the first ~100 years of the phylogenetic tree  
84 (green). The clouds represent the 95% interval of the Highest Posterior Probability Density of locations.  
85 **(B)** Current distribution map (blue) summarizing the last ~100 years. Clouds as in (A). **(C, D)** Diversity  
86 in time and space. **(C)** Diversity in time. Each point represents the average hamming genetic distance  
87 among samples within a decade. The black line shows the fit using a generalized additive model and the  
88 grey shaded area the 95% confidence interval. **(D)** Diversity in space. Each point represents the average  
89 hamming genetic distance among the 10 geographically closest neighbors. Genetic distances are  
90 represented as a scaled gradient from red (low) to blue (high) local genetic diversity.  
91 Related to Figure 3 and 4.



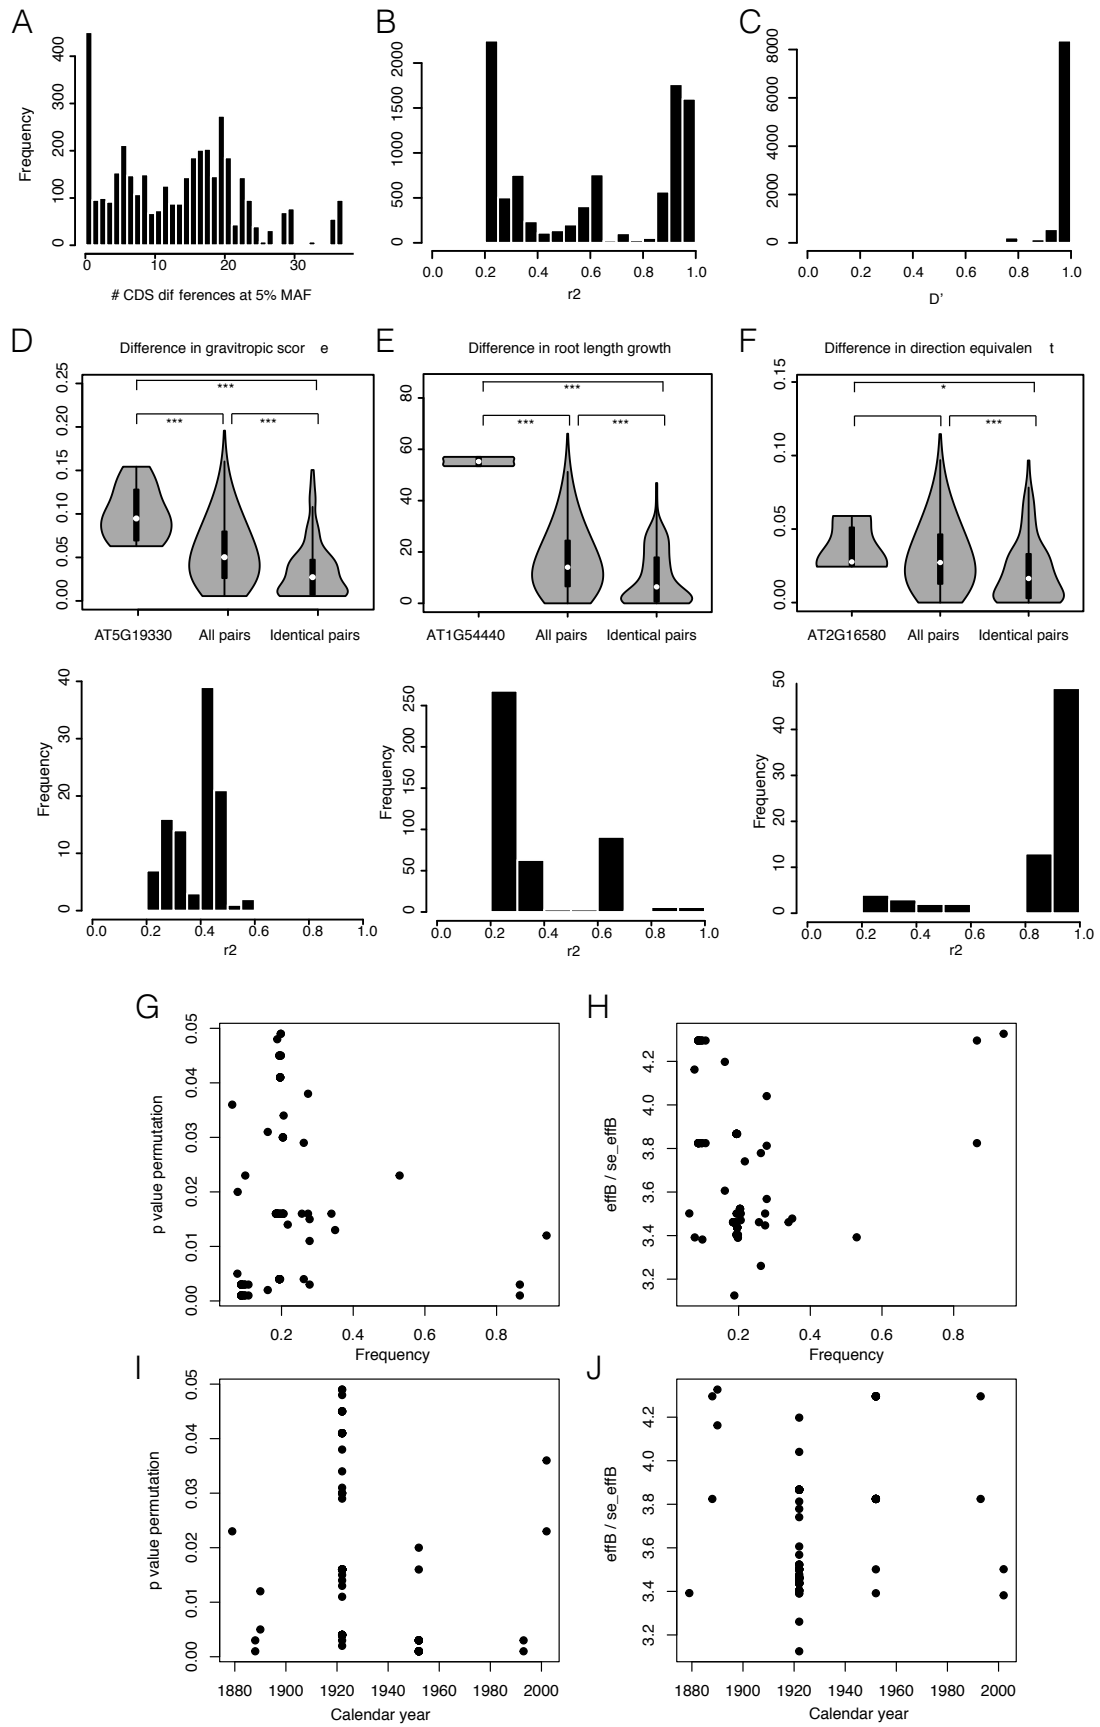

93 **Figure S6. Linkage disequilibrium and SNPs with significant trait associations and**  
94 **correlations between SNP effects, frequency and age.**

95 **(A-F)** Linkage disequilibrium and SNPs with significant trait associations. Histogram of genetic distances  
96 **(A)** between samples when evaluating only coding regions at 5% minimum allele frequency. Linkage  
97 disequilibrium between SNP hits measured as  $r^2$  **(B)** and  $D'$  **(C)**. Three significant SNPs were further  
98 studied to exemplify the power of association analyses with HPGI. For each, phenotypic differences  
99 between accessions that differ in the focal SNP and that are otherwise virtually genetically identical are  
100 compared both with all pairs of accession and with pairs of accessions completely identical for coding  
101 regions. Below each violin plot is the histogram of linkage disequilibrium of the focal SNP with all other  
102 SNP hits. The three focal SNPs evaluated are inside AT5G19330 **(D)**, AT1G54440 **(E)** and AT2G16580  
103 **(F)** genes. **(G-J)** Correlation between SNP effects, frequency and age. Correlation between SNP  
104 frequency and p-value **(G)**, frequency and effect **(H)**, age and p-value **(I)**, age and effect **(J)**.  
105 Related to Figure 5.

106

107

## 108 **SUPPLEMENTAL EXPERIMENTAL PROCEDURES**

### 109 **Sample collection**

110 Modern *A. thaliana* accessions were chosen from the collection described by Platt and colleagues (2010);  
111 HPGI candidates were identified based on 149 genome-wide SNPs (Table S1). Seeds were bulked at the  
112 University of Chicago. Progeny for DNA extraction was grown at the Max Planck Institute for  
113 Developmental Biology. Herbarium specimens (collection dates 1863-1993) were directly sampled by  
114 our colleagues Jane Devos and Gautam Shirsekar, or sent to us by collection curators (Table S1). We  
115 used 2 to 8 mm<sup>2</sup> of dried tissue for destructive sampling.

### 116 **DNA extraction, library preparation and sequencing**

117 DNA from herbarium specimens was extracted in a clean room facility at the University of Tübingen as  
118 described (Yoshida et al., 2013). Two sequencing libraries were prepared for each specimen; without  
119 and with repair of deaminated sites with uracil-DNA glycosylase and endonuclease VIII (Briggs et al.,  
120 2010). DNA from modern, live samples was extracted from rosette leaves pooled from 8 individual  
121 plants using the DNeasy plant mini kit (Qiagen, Hilgendorf, Germany). Genomic DNA libraries were  
122 prepared using the TruSeq DNA Sample prep kit or TruSeq Nano DNA sample prep kit (Illumina, San  
123 Diego, CA). Unrepaired herbarium libraries were screened for authenticity by sequencing at low  
124 coverage on Illumina HiSeq 2500 or MiSeq instruments. Production sequencing (101 bp paired end) was  
125 carried out on an Illumina HiSeq 2000 instrument.

### 126 **Read processing**

127 Paired-end reads from modern samples were trimmed and quality filtered before mapping using the  
128 SHORE pipeline v0.9.0 (Hagmann et al., 2015; Ossowski et al., 2008). Because ancient DNA fragments  
129 are short (Fig. S1B), forward and reverse reads for herbarium samples were merged after trimming,  
130 requiring a minimum of 11 bp overlap (Yoshida et al., 2013), and were treated as single-end reads. Reads  
131 were mapped with GenomeMapper v0.4.5s (Schneeberger et al., 2009) against an HPGI pseudo-  
132 reference genome (Hagmann et al., 2015), and against the Col-0 reference genome. Samples JK2509 to  
133 JK2531 were only mapped to the HPGI pseudo-reference genome. Coverage, number of covered  
134 positions in the genome, and number of SNPs identified per accession relative to HPGI are reported in  
135 Table S1.

136 We also sequenced the genomes of twelve greenhouse-grown mutation accumulation (MA) lines  
137 (Becker et al., 2011; Shaw et al., 2000) (Table S2). We called SNPs, indels and structural variants (SVs),  
138 following the workflow and parameters described (Hagmann et al., 2015), but without repeated  
139 iterations. This procedure resulted in 2,203 polymorphisms that were shared by all lines, indicating  
140 errors in the reference sequence (12% of variants replaced N's in the TAIR9 genome) or genetic  
141 differences in the founder plant of the MA population compared to the Col-0 individual that had been  
142 used to generate the reference genome. In addition, we identified 388 segregating variants across the  
143 twelve lines (Table S2), of which 350 were singletons. This analysis revealed on average 25.5 SNPs, 4.9  
144 deletions and 3.2 insertions per 31st generation line (Table S2), compared to 19.6 SNPs, 2.4 deletions  
145 and 1.0 insertions previously detected in the 30<sup>th</sup> generation with shorter read length and lower read  
146 depth (Ossowski et al., 2010). The genome length accessed in this sequencing effort, 115,954,227 bp,  
147 was used to scale the number of point mutations to a rate of  $7.1 \times 10^{-9}$  mutations site<sup>-1</sup> generation<sup>-1</sup>  
148 (Table S3).

#### 149 **Identification of *bona fide* HPGI accessions and HPGI phylogeny**

150 We established the relationships among samples at three levels of resolution: (i) the original 149 nuclear  
151 SNP genotyping calls based on which the HPGI haplogroup had been identified (Platt et al., 2010), (ii)  
152 SNPs in the chloroplast genome (where we did not find any variants), (iii) and all nuclear genome SNPs.  
153 At these three levels we performed a multidimensional scaling (MDS) analysis and built a neighbor-  
154 joining tree using the adegenet package in R (Jombart et al., 2008).

155 We used four methods to estimate the relationships among modern accessions, and between  
156 modern accessions and historic specimens: (i) multidimensional scaling (MDS) analysis; (ii) construction  
157 of a neighbor joining tree with the adegenet package in R (Jombart, 2008), with branch support assessed  
158 with 1,000 bootstrap iterations; (iii) construction of a parsimony network using SplitsTree v.4.12.3  
159 (Huson and Bryant, 2006), with confidence values calculated with 1,000 bootstrap iterations; (iv)  
160 performing a Bayesian phylogenetic analysis using BEAST v.1.8 (Bouckaert et al., 2014; Drummond et al.,  
161 2012) (see below).

#### 162 **Descriptive genome-wide statistics**

163 We estimated genetic diversity as Watterson's  $\theta$  and nucleotide diversity  $\pi$ , and the difference between  
164 these two statistics as Tajimas's  $D$  using DnaSP v5 (Librado and Rozas, 2009), both for the entire dataset  
165 and independently for modern and herbarium specimens. We calculated the folded and unfolded site  
166 frequency spectrum (SFS) for the whole dataset. For the unfolded SFS, we assigned the ancestral state

167 using the *Arabidopsis lyrata* genome (Hu et al., 2011). We estimated pairwise linkage disequilibrium (LD)  
168 between all possible combinations of informative sites, ignoring singletons, by computing  $r^2$ ,  $D$  and  $D'$   
169 statistics. LD decay was estimated using a linear regression approach. For the modern individuals, we  
170 calculated the recombination parameter  $R$  and performed the four-gamete-test (Hudson and Kaplan,  
171 1985) to identify the minimum number of recombination events. All LD and recombination related  
172 statistics were determined using DnaSP v5 (Librado and Rozas, 2009).

### 173 **Substitution and mutation rate analyses**

#### 174 *Greenhouse-grown mutation accumulation lines*

175 Mutation rate estimated from greenhouse-grown mutation accumulation lines (Becker et al., 2011) was  
176 calculated per line, and the mean and confidence intervals are reported. For each 31<sup>st</sup> generation MA  
177 line, the number of point mutations detected was divided by 31 and by the total genome length. The  
178 genome length was determined as all base pairs with coverage higher or equal to 3, and a SHORE  
179 mapping quality score of at least 32 in one sample (Table S2).

#### 180 *Natural populations of HPGI*

181 To estimate the number of nucleotide changes per year in natural populations of HPGI, we took  
182 advantage of the known collection years of the samples. We used genome-wide nuclear SNPs to  
183 calculate pairwise “net” genetic distances between historic and modern HPGI samples using the  
184 equation  $D'_{ij} = D_{ic} - D_{jc}$ , where  $D'_{ij}$  is the net distance between a modern sample  $i$  and a historic sample  $j$ ;  
185  $D_{ic}$  the distance between the modern sample  $i$  and the reference genome  $c$ ; and  $D_{jc}$  is the distance  
186 between a modern sample ( $j$ ) and the reference genome ( $c$ ). We calculated a pair-wise time distance in  
187 years,  $T'_{ij}$ , between all modern and historic pairs using the collection dates and linear regression:

$$188 \quad D' = a + bT'$$

189 The slope coefficient  $b$  describes the number of substitution changes per year. However, the points in  
190 the regression are not independent because different lines have some common evolutionary history,  
191 regression confident intervals would be “over-confident”. We calculated more rigorous 95% confidence  
192 intervals using 1000 bootstrap resamples (Drummond et al., 2003). We used either all SNPs or SNPs at  
193 specific annotations. To scale the genome-wide substitution rate into a per-base rate, we used all  
194 positions that passed SNP or reference call quality thresholds, instead of using a single value of genome  
195 length.

196           The second approach to estimate a substitution rate was framed in Bayesian phylogenetics using  
197 the tip-calibration approach implemented in BEAST v1.8 software (Drummond et al., 2012). After  
198 systematic runs and chain convergence assessment of different demographic and molecular clock  
199 models, we determined that the Skygrid demographic model and the lognormal relaxed molecular clock  
200 were the most appropriate. Our analysis simultaneously optimized tree topology and length, substitution  
201 rate, and the demographic model. Using the relationship between the time distance of two sequences  
202 and the difference in branch length in the tree, BEAST estimates a molecular clock. Under a relaxed  
203 molecular clock, the substitution rate is allowed to vary across branches with a lognormal distribution.  
204 The prior used for molecular clock was a Continuous-Time Markov Chain (CTMC) (Ferreira and  
205 Suchard, 2008). The demographic model is a Bayesian nonparametric demographic model that is  
206 optimized for multiple loci, and which allows for complex demographic trajectories by estimating  
207 population sizes in time bins (of 10 years in our case) across the tree, based on the number of  
208 coalescent events per bin (Gill et al., 2012). In addition, to confirm that demography and root dating  
209 converged on the same parameters, we performed a second estimate using a fixed substitution rate of  
210  $3.3 \times 10^{-9}$  substitutions site<sup>-1</sup> year<sup>-1</sup> that we had estimated empirically using the net-distance method.

211           The analysis was carried out remotely at CIPRES PORTAL (v3.1 [www.phylo.org](http://www.phylo.org)) using  
212 uninformative priors. The run took about 1,344 CPU hours and performed 1,000 million steps in a  
213 Monte Carlo Markov Chain (MCMC), sampling every 100,000 steps. Burn-in was adjusted to 10% of  
214 steps. To visualize the tree output we produced a Maximum Clade Credibility (MCC) tree with a  
215 minimum posterior probability threshold of 0.8 and a 10% burn-in using TreeAnnotator (part of BEAST  
216 package), and visualized the MCC tree using FigTree ([tree.bio.ed.ac.uk/software/figtree/](http://tree.bio.ed.ac.uk/software/figtree/)). Additionally,  
217 we used DensiTree (Bouckaert, 2010) to draw simultaneously the 10,000 BEAST trees with the highest  
218 posterior probability. Since all trees were drawn transparently, agreements in both topology and branch  
219 lengths appear as densely colored regions (Fig. 3A), while areas with little agreement appear lighter.

## 220 **Demography and migration of HPG I**

221 From the Bayesian phylogenetic analyses described in previous sections, we studied the demographic  
222 model estimated via Skygrid. We reconstructed a skyline plot that depicts changes in effective  
223 population size, a measure of relative diversity, through time (Bouckaert et al., 2014; Drummond et al.,  
224 2012). Implementation of non-phylogenetic methodologies for demographic inference exist, e.g. Multiple  
225 sequentially Markovian coalescent (MSMC) (Schiffels and Durbin, 2014), but after exploring them we  
226 concluded that their resolution is not sufficient for analyses of the last several centuries, as in our case.

227 We performed another Bayesian phylogenetic analysis incorporating a geographic location trait  
228 (Lemey et al., 2010; Wilson and Barton, 1995). For this, Brownian diffusion parameters are estimated by  
229 fitting a continuous gradient of geographic locations along tree branches, starting from the leaves of the  
230 tree for which geographic locations are known, i.e. the collection sites of our samples. We excluded  
231 three samples from the West coast of the United States, since propagation by Brownian diffusion along  
232 large distances is an unrealistic model. We ran this analysis with the parameters described in the  
233 previous sections and sliced the resulting 3D (temporal and geographical) phylogeny at the early 16<sup>th</sup>  
234 century and late 18<sup>th</sup> century using SPREAD software (Bielejec et al., 2011).

235 We used a heuristic search using an isolation-by-distance pattern inspired by (Handley et al.,  
236 2007) to find the origin of diffusion of HPGI in North America, and compared it to the phylogeography  
237 analyses. We performed pairwise tests of the relation between genetic and geographic distances using a  
238 linear regression. Afterwards we decomposed for each sample the isolation-by-distance pattern (i.e.  
239 each row of both distance matrices), and tested whether the slope of the regression still held, that is,  
240 whether the remaining samples showed a gradual increase in genetic distance as they moved away from  
241 the presumed origin. The sample locations that showed the steepest and most significant slopes were  
242 assumed to have been closest to the origin of HPGI diffusion. Because there are indications that more  
243 than a single spread of the groups might have happened, we performed the isolation by distance analyses  
244 for modern accessions and herbarium specimens separately. These two analyses allowed us to locate  
245 the origin of the modern and historic diffusions of HPGI in North America, respectively. The analysis  
246 consisted of a heuristic search across all sampled locations, in which a regression between genetic  
247 *distance ~ Euclidean geographic distances* was performed.

## 248 **Analysis of the methylation status of mutated sites**

249 As in many other species, the spectrum of *de novo* mutations in *A. thaliana* is biased towards G:C→A:T  
250 transitions in greenhouse-grown mutation accumulation lines (Ossowski et al., 2010), leading to an  
251 inflated transition-to-transversion ratio (Ts/Tv). This bias is less pronounced in recent mutations in a  
252 Eurasian collection of natural accessions (Cao et al., 2011) and in HPGI accessions (Fig. 3D). A recent  
253 multigenerational salt stress experiment in the greenhouse also showed a more balanced Ts/Tv (Jiang et  
254 al., 2014). These findings indicate that less benign conditions might promote a lower Ts/Tv.

255 The mechanisms underlying a high Ts/Tv ratio are unknown, but could include spontaneous deamination  
256 of methylated cytosines (5-methyl-C → T). In agreement with this possibility, we found previously that  
257 ancestral cytosines methylated in the *A. thaliana* reference strain had a more than two-fold higher

258 polymorphism rate than unmethylated cytosines, with the highest rate found in CHG sites (where H is  
259 A, C or T) (Table I, Cao et al., 2011).

260 We interrogated the putative evolutionary role of cytosine methylation in the mutability of  
261 cytosine bases in the HPGI accessions. For reference DNA methylation data, we used previously  
262 generated bisulfite-sequencing data of HPGI strains (Hagmann et al., 2015) and of Col-0 lines (Becker et  
263 al., 2011), respectively. Our rationale was that if methylation affected mutability, this should reflect in the  
264 proportion of mutated sites being methylated in the reference datasets, compared to that proportion  
265 for non-mutated sites. To be able to determine the ancestral state of a given site, we only considered  
266 positions for which we could determine that state by alignment to the *A. lyrata* genome (Hu et al., 2011).

267 The test set of genomic positions consisted of the  $n$  sites that were invariant cytosines in *A.*  
268 *lyrata* and the *A. thaliana* Col-0 reference genome and whose derived allele was present in at least one  
269 HPGI accession (i.e., SNPs segregating within the HPGI population). For these sites, we determined the  
270 fraction of methylated cytosines as the number of corresponding sites classified as ‘methylated’ in the  
271 HPGI and Col-0 reference datasets, respectively, divided by  $n$ .

272 As a first control set of sites, hence called ‘neutral’, we selected cytosines that were invariant  
273 between *A. lyrata*, Col-0, and all HPGI accessions. A second control set, which we called ‘fixed’,  
274 consisted of cytosines that were invariant between *A. lyrata* and Col-0, and that had mutated and had  
275 been fixed in all HPGI accessions. For both control sets we generated empirical distributions of the  
276 fraction of sites that were methylated in the HPGI and Col-0 reference datasets, respectively. To this  
277 end, we randomly selected  $n$  positions with sequence information in the methylation datasets; this  
278 process was repeated 1,000 times.

279 Ancestral cytosines with higher methylation proportion in both *A. thaliana* and HPGI methylome  
280 datasets were more likely to mutate to thymines (Fig. S3 C-F). Surprisingly, not only C→T but also  
281 C→A/G segregating sites were more likely to have been methylated compared to the fixed and neutral  
282 positions, which cannot be explained by higher deamination rates of methylated vs. unmethylated  
283 cytosines.

284 There is an ongoing debate on how epigenetics, i.e. environmentally-induced modification with  
285 non-Mendelian inheritance, could contribute to adaptation (Mirouze and Paszkowski, 2011; Nicotra et  
286 al., 2010). This result could certainly constitute a genetically-based hypothesis of epigenetic roles in  
287 adaptation, perhaps in favor of the “adaptive mutation” argument heavily evidenced in bacteria (Al  
288 Mamun et al., 2012).



## 289 **Inference of genome-wide selection parameters**

290 We estimated the average strength of genome-wide selection using the non-equal relationship between  
291 whole-genome and intergenic substitution rates. We selected intergenic regions as the neutral reference  
292 because they should not involve any direct phenotypic or biochemical effect but have abundant sites to  
293 compare with. This was based on the well-known relationship described by Kimura (1967):

$$294 \quad k = \mu \times Q \times 2N_e,$$

295 where  $k$  is the substitution rate,  $\mu$  the mutation rate,  $N_e$  the effective population size, and  $Q$  the fixation  
296 probability of a new mutation. Under neutrality, substitution and mutation rate should be equal since  
297  $Q = \frac{1}{2} N_e$  and the effective population size term,  $2N_e$ , cancels out in the equation. With a semidominant  
298 genome-wide selection coefficient  $s$  acting on a new mutation,  $Q \approx s / 2N_e (1 - e^{-2N_e s})$  (Charlesworth and  
299 Charlesworth, 2010). We used the intergenic substitution rate as proxy for the mutation rate  $\mu$  and the  
300 whole-genome substitution rate as proxy for the substitution rate  $k$ . We solved the equation for  $2N_e s$ ,  
301 known as the population selection parameter.

$$302 \quad k / \mu = 2N_e \times ( s / 2N_e (1 - e^{-2N_e s}) )$$

## 303 **Association analyses and dating of newly arisen mutations**

304 For 63 modern accessions, we measured time to bolting and flowering with four replicates, and  
305 fecundity (as seed set) with one replicate in growth chambers at the University of Chicago. Additionally,  
306 using  $\geq 10$  replicates we analyzed primary root phenotypes at the Gregor Mendel Institute in Vienna,  
307 describing growth and morphological traits extracted from images as described (Slovak et al., 2014) (see  
308 next section for details in phenotypic characterization). For associations with climate parameters, we  
309 followed a similar rationale as described (Hancock et al., 2011). We extracted information from the  
310 publicly available bioclim database (<http://www.worldclim.org/bioclim>) at 2.5 degrees resolution raster  
311 and intersected it with geographic locations of HPGI samples ( $n = 103$ ).

312 We performed association analyses using the R package GenABEL (Aulchenko et al., 2007), with  
313 measured phenotypes ( $p = 25$ ) and climatic variables ( $c = 18$ ) as response variables and SNPs as  
314 explanatory variables. A Minimum Allele Frequency cutoff 5% was used. The number of assessed SNPs  
315 was 391 in a dataset of only modern samples but imputed genotypes for missing data using Beagle v4.0  
316 (Browning and Browning, 2009), and 456 SNPs with a dataset of modern and also historic samples,  
317 although without imputation. For all associations, either phenotypic or climatic ones, minimum 63  
318 individuals were genotyped for a SNP. All phenotypic variables were measured in common chamber or  
319 common garden experiments. We first investigated broad sense heritability ( $H^2$ ) of each trait using

320 ANOVA partition of variance between and within lines using replicates (Table S4). Significance was  
321 obtained by common F test in ANOVA. Secondly we used the *polygenic\_hglm* function in GenABEL to fit  
322 a genome wide kinship matrix in order to calculate a narrow sense heritability estimate ( $h^2$ ). Significance  
323 was calculated employing a likelihood ratio test comparing with a null model. In principle,  $h^2$  is a  
324 component of  $H^2$ , then its values should always be  $h^2 < H^2$ . Our result cannot be interpreted in this  
325 framework, since we employed genotype means for  $h^2$  calculation and replicate measurements for  $H^2$   
326 calculation. This reduced the environmental and developmental noise and thus inflated  $h^2$  (Table S4). In  
327 this framework, however, we could calculate  $h^2$  for climatic variables as well. Seed size had a particularly  
328 high heritability, a pattern attributed to highly accurate and replicated measurements (see Phenotyping  
329 section). For association analyses we first employed a linear mixed model that fitted the kinship matrix  
330 using the *mmscore* function, and only three significant SNP hits were discovered using a 5% significance  
331 threshold after False Discovery Rate correction (FDR). This was expected since we have very few  
332 variants and these would have originated in an approximated phylogeny structure. We concluded that  
333 fitting the kinship matrix in our model was not appropriate since there would be no leftover variation  
334 for association with specific SNPs. With this rationale we employed a fixed effects linear model using the  
335 function *qtscore* from GenABEL. To reduce the false-positive rate we took a conservative permutation  
336 strategy that consisted in carrying out association analyses over 1,000 random datasets (permuting  
337 phenotypes across individuals) and used the resulting p-value distribution to correct p-values estimated  
338 with the original dataset. SNPs with p-values below 5% in the empirical p-value distribution were  
339 considered significant (Table S5). In climatic models, we additionally included longitude and latitude as  
340 covariates to correct any spurious association between SNPs and climate gradients created by the  
341 migratory pattern of isolation by distance. Significant SNPs were interspersed throughout the genome  
342 (Fig. S4) and their p-value and phenotypic effect did not correlate with the putative age of the SNPs  
343 neither with the frequency, something that could have indicated that the significance was merely driven  
344 by the higher statistical power of intermediate frequency variants (Fig. S5 G-J). Using QQ plots to assess  
345 inflation or deflation of p-values, we observed generally that permutation corrected p-values were  
346 deflated. Straight series of points in QQ plots indicate identical p-values for multiple SNPs, a pattern that  
347 we attributed to long range LD, i.e. lack of independence (see Graphical Table S6 for trait distributions  
348 and QQ plots from each association analysis). Due to this fact, we add two correction procedures  
349 more: (1) Bonferroni-correcting the significance threshold for permutation corrected SNPs from 5% to  
350 5% / number of traits, i.e. 0.2% for phenotype association and 0.27% for climatic associations. (2)  
351 Bonferroni-correcting the significance threshold for raw p-values from 5% to 5% / (number of SNPs +  
352 number of traits), i.e. 0.01% for phenotype and climatic associations (Table I and S5).

353 For each SNP in our dataset, we determined directionality of mutation, i.e. ancestral vs derived  
354 alleles, by determining which state was found in the oldest herbarium samples. We compared the time  
355 of emergence and the centroid of geographic distribution of the alternative alleles of SNP hits to random  
356 draws of SNPs with the same minimum allele frequency filtering (5%).

357 On top of phenotypic and climatic associations of SNP hits, we also provide a putative protein  
358 effect employing a commonly used amino acid matrix of biochemical effects (Grantham, 1974). Gene  
359 name and ontology categorization of SNPs inside annotated transcriptional units was extracted from the  
360 online tool [www.arabidopsis.org/tools/bulk/go/](http://www.arabidopsis.org/tools/bulk/go/).

### 361 **Association analyses – proof of concept examples**

362 We argue that the power of an association approach relies on the fact that HPGI lines resemble Near  
363 Isogenic Lines (NILs) produced by experimental crosses (Weigel, 2012). Similarly to genome-wide  
364 association studies (GWA), power depends on a number of factors, namely the noise of phenotype  
365 under study, architecture of phenotypic trait, quality of genotyping, population structure, sample  
366 diversity, sample size, allele frequency, and recombination. On one hand, association analyses in NILs  
367 suffers from large linkage blocks, but confident results can be achieved due to accurate measurement of  
368 phenotypes, limited genetic differences between any two lines, and high quality genotypes. In common  
369 GWA such as in humans, there are multiple confounding effects. Among the confounders are (1) that  
370 any two samples differ in hundreds of thousands of SNP and (3) that historical and geographic  
371 stratification produce non-random correlations among those SNP differences. This complicates  
372 considerably the identification of phenotypic effects at specific genes, and power relies greatly on large  
373 samples and frequent recombination between markers.

374 We exemplify the association analysis confidence with some examples. To provide support for  
375 the nonsynonymous SNP on chromosome 5, at position 6,508,329 in AT5G19330, we looked for pairs  
376 of lines that carry the ancestral and the derived allele, but that differ in few (or no other) SNP in the  
377 genome. When considering all genic substitutions with a minimum allele frequency of 5% (Fig. S6A), we  
378 identified 20 pairs of lines differing only in the AT5G19330 SNP and another linked SNP (which is  
379 located on a different chromosome and had an association p-value > 0.4). The phenotypic differences in  
380 mean gravitropic score of these almost-identical pairs were significantly higher than phenotypic  
381 differences among all pairs of HPGI lines, and genetically identical pairs attending to substitutions inside  
382 genes (Fig. S6D). Furthermore this SNP was not in linkage disequilibrium with any other SNP hit ( $r^2 <$   
383 0.6) (Fig. S6D). A similar approach was used to examine the SNPs in AT2G02220 (Fig. S6E) and  
384 AT2G16580 (Fig. S6F).

## 385 **Phenotyping**

### 386 Root phenotypes

387 Fifteen root phenotypes were scored for three replicates per genotype over a time-series experiment  
388 via image analysis as described in detail in (Slovak et al., 2014). We used the mean and standard  
389 deviation of the time series values for association analyses.

### 390 Seed size phenotype:

391 We dispersed the seeds of given genotypes on separate plastic square 12 x 12 cm Petri dishes. For  
392 faster image acquisition we used cluster of eight Epson V600 scanners. The scanner cluster was  
393 operated by the BRAT Multiscan image acquisition tool ([https://www.gmi.oeaw.ac.at/research-](https://www.gmi.oeaw.ac.at/research-groups/wolfgang-busch/resources/brat/)  
394 [groups/wolfgang-busch/resources/brat/](https://www.gmi.oeaw.ac.at/research-groups/wolfgang-busch/resources/brat/)). The resulting 1600 dpi images were analyzed in Fiji software.  
395 Scans were converted to 8-bit binary images, thresholded (parameters: setAutoThreshold("Default  
396 dark"); setThreshold(20, 255)) and particles analyzed (inclusion parameters: size=0.04-0.25  
397 circularity=0.70-1.00). The 2D seed size was measured in square millimeters (parameters: distance=1600  
398 known=25.4 pixel=1 unit=mm) on  $\geq 500$  replicates per genotype.

### 399 Flowering time in growth chambers

400 We estimated the flowering time in growth chambers under 4 vernalization treatments. We grew 6  
401 replicates per accession divided between two complete randomized blocks for each treatment. Seeds  
402 were sown on a 1:1 mixture of Premier Pro-Mix and MetroMix and cold stratified for 6 days (6°C, no  
403 light). We then let plants germinate and grow at 18°C, 14 hours light, 65% humidity. After 3 weeks, we  
404 transferred the plants to the vernalization conditions (6°C, 8 hours light, and 65% humidity). The 4  
405 treatments consisted of 0, 14, 28 and 63 days of vernalization, respectively. After the vernalization  
406 treatment, plants were transferred back to the previous long day growth conditions. Trays were rotated  
407 around the growth chambers every other day throughout the experiments, under both vernalization and  
408 growth conditions. Germination, bolting and flowering dates were recorded every other day until all  
409 plants had flowered. Days till flowering or bolting times were calculated from the germination date until  
410 the first flower bud was developed and until the first flower opened, respectively. The average flowering  
411 time and bolting time per genotype was used for association analyses.

### 412 Flowering time and fecundity in the field

413 To investigate variation in flowering time and fecundity in natural conditions, we grew 3 replicates for  
414 each of the 78 accessions in a field experiment following a completely randomized block design. Seeds  
415 were sowed between 09/20/2012 to 09/22/2012 in 66 well trays (well diameter=4cm) on soil from the

416 field site where plants were to be transplanted. The trays were cold stratified for seven days before  
417 being placed in a cold frame at the University of Chicago, IL, USA, (outdoors, no additional light or heat,  
418 but watered as needed and protected from precipitation). Seedlings were transplanted directly into tilled  
419 ground at the Warren Wood field station (41.84° North, 86.63° West), Michigan, USA on 10/13/2012  
420 and 10/14/2012. Seedlings were watered-in and left to overwinter without further intervention. Plants  
421 were scored for bolting and flowering in Spring 2013. Upon maturation of all fruits, stems were  
422 harvested and stored between sheets of newsprint paper. To estimate the fecundity, stems were  
423 photographed on a black background and the size of each plant was estimated as the number of pixels  
424 occupied by the plant on the image. This measure correlates well with the total length of siliques  
425 produced, a classical estimator of fecundity in *A. thaliana* (Spearman's  $\rho=0.84$ ,  $p$ -value $<0.001$ , data not  
426 shown).

## 427 SUPPLEMENTAL REFERENCES

- 428 Al Mamun, A.A., Lombardo, M.J., Shee, C., Lisewski, A.M., Gonzalez, C., Lin, D., Nehring, R.B., Saint-Ruf,  
429 C., Gibson, J.L., Frisch, R.L., et al. (2012). Identity and function of a large gene network underlying  
430 mutagenic repair of DNA breaks. *Science* 338, 1344-1348.
- 431 Aulchenko, Y.S., Ripke, S., Isaacs, A., and van Duijn, C.M. (2007). GenABEL: an R library for genome-  
432 wide association analysis. *Bioinformatics* 23, 1294-1296.
- 433 Becker, C., Hagmann, J., Müller, J., Koenig, D., Stegle, O., Borgwardt, K., and Weigel, D. (2011).  
434 Spontaneous epigenetic variation in the *Arabidopsis thaliana* methylome. *Nature* 480, 245-249.
- 435 Bielejec, F., Rambaut, A., Suchard, M.A., and Lemey, P. (2011). SPREAD: spatial phylogenetic  
436 reconstruction of evolutionary dynamics. *Bioinformatics* 27, 2910-2912.
- 437 Bouckaert, R., Heled, J., Kühnert, D., Vaughan, T., Wu, C.-H., Xie, D., Suchard, M.a., Rambaut, A., and  
438 Drummond, A.J. (2014). BEAST 2: a software platform for Bayesian evolutionary analysis. *PLoS*  
439 *Comp Biol* 10, e1003537.
- 440 Briggs, A.W., Stenzel, U., Meyer, M., Krause, J., Kircher, M., and Pääbo, S. (2010). Removal of deaminated  
441 cytosines and detection of in vivo methylation in ancient DNA. *Nucleic Acids Res* 38, e87.
- 442 Browning, B.L., and Browning, S.R. (2009). A unified approach to genotype imputation and haplotype-  
443 phase inference for large data sets of trios and unrelated individuals. *Am J Hum Genet* 84, 210-223.
- 444 Cao, J., Schneeberger, K., Ossowski, S., Gunther, T., Bender, S., Fitz, J., Koenig, D., Lanz, C., Stegle, O.,  
445 Lippert, C., et al. (2011). Whole-genome sequencing of multiple *Arabidopsis thaliana* populations. *Nat*  
446 *Genet* 43, 956-963.
- 447 Charlesworth, B., and Charlesworth, D. (2010). *Elements of Evolutionary Genetics* (Roberts and  
448 Company: Greenwood Village, CO, 2010).
- 449 Drummond, A., Pybus, O.G., and Rambaut, A. (2003). Inference of viral evolutionary rates from  
450 molecular sequences. *Adv Parasitol* 54, 331-358.
- 451 Drummond, A.J., Suchard, M.A., Xie, D., and Rambaut, A. (2012). Bayesian phylogenetics with BEAUti  
452 and the BEAST 1.7. *Mol Biol Evol* 29, 1969-1973.
- 453 Ferreira, M.A.R., and Suchard, M.A. (2008). Bayesian analysis of elapsed times in continuous-time  
454 Markovchains. *Can J Stat* 36, 355-368.
- 455 Gill, M.S., Lemey, P., Faria, N.R., Rambaut, A., Shapiro, B., and Suchard, M.a. (2012). Improving Bayesian  
456 population dynamics inference: a coalescent-based model for multiple loci. *Mol Biol Evol* 30, 713-  
457 724.
- 458 Grantham, R. (1974). Amino acid difference formula to help explain protein evolution. *Science* 185, 862-  
459 864.

- 460 Hagmann, J., Becker, C., Müller, J., Stegle, O., Meyer, R.C., Wang, G., Schneeberger, K., Fitz, J., Altmann,  
461 T., Bergelson, J., et al. (2015). Century-scale methylome stability in a recently diverged *Arabidopsis*  
462 *thaliana* lineage. *PLoS Genet* 11, e1004920.
- 463 Hancock, A.M., Brachi, B., Faure, N., Horton, M.W., Jarymowycz, L.B., Sperone, F.G., Toomajian, C.,  
464 Roux, F., and Bergelson, J. (2011). Adaptation to climate across the *Arabidopsis thaliana* genome.  
465 *Science* 334, 83-86.
- 466 Handley, L.J.L., Manica, A., Goudet, J., and Balloux, F. (2007). Going the distance: human population  
467 genetics in a clinal world. *Trends Genet* 23, 432-439.
- 468 Hu, T.T., Pattyn, P., Bakker, E.G., Cao, J., Cheng, J.F., Clark, R.M., Fahlgren, N., Fawcett, J.A., Grimwood,  
469 J., Gundlach, H., et al. (2011). The *Arabidopsis lyrata* genome sequence and the basis of rapid genome  
470 size change. *Nat Genet* 43, 476-481.
- 471 Hudson, R.R., and Kaplan, N.L. (1985). Statistical properties of the number of recombination events in  
472 the history of a sample of DNA sequences. *Genetics* 111, 147-164.
- 473 Huson, D.H., and Bryant, D. (2006). Application of phylogenetic networks in evolutionary studies. *Mol*  
474 *Biol Evol* 23, 254-267.
- 475 Jiang, C., Mithani, A., Belfield, E.J., Mott, R., Hurst, L.D., and Harberd, N.P. (2014). Environmentally  
476 responsive genome-wide accumulation of de novo *Arabidopsis thaliana* mutations and epimutations.  
477 *Genome Res* 24, 1821-1829.
- 478 Jombart, T. (2008). adegenet: a R package for the multivariate analysis of genetic markers. *Bioinformatics*  
479 24, 1403-1405.
- 480 Lemey, P., Rambaut, A., Welch, J.J., and Suchard, M.a. (2010). Phylogeography takes a relaxed random  
481 walk in continuous space and time. *Mol Biol Evol* 27, 1877-1885.
- 482 Librado, P., and Rozas, J. (2009). DnaSP v5: a software for comprehensive analysis of DNA  
483 polymorphism data. *Bioinformatics* 25, 1451-1452.
- 484 Mirouze, M., and Paszkowski, J. (2011). Epigenetic contribution to stress adaptation in plants. *Curr Opin*  
485 *Plant Biol* 14, 267-274.
- 486 Nicotra, A.B., Atkin, O.K., Bonser, S.P., Davidson, A.M., Finnegan, E.J., Mathesius, U., Poot, P.,  
487 Purugganan, M.D., Richards, C.L., Valladares, F., et al. (2010). Plant phenotypic plasticity in a  
488 changing climate. *Trends Plant Sci* 15, 684-692.
- 489 Ossowski, S., Schneeberger, K., Clark, R.M., Lanz, C., Warthmann, N., and Weigel, D. (2008).  
490 Sequencing of natural strains of *Arabidopsis thaliana* with short reads. *Genome Res* 18, 2024-2033.
- 491 Ossowski, S., Schneeberger, K., Lucas-Lledo, J.I., Warthmann, N., Clark, R.M., Shaw, R.G., Weigel, D.,  
492 and Lynch, M. (2010). The rate and molecular spectrum of spontaneous mutations in *Arabidopsis*  
493 *thaliana*. *Science* 327, 92-94.

- 494 Platt, A., Horton, M., Huang, Y.S., Li, Y., Anastasio, A.E., Mulyati, N.W., Agren, J., Bossdorf, O., Byers, D.,  
495 Donohue, K., et al. (2010). The scale of population structure in *Arabidopsis thaliana*. PLoS Genet 6,  
496 e1000843.
- 497 Schiffels, S., and Durbin, R. (2014). Inferring human population size and separation history from multiple  
498 genome sequences. Nat Genet.
- 499 Schneeberger, K., Hagmann, J., Ossowski, S., Warthmann, N., Gesing, S., Kohlbacher, O., and Weigel, D.  
500 (2009). Simultaneous alignment of short reads against multiple genomes. Genome Biol 10, R98.
- 501 Shaw, R.G., Byers, D.L., and Darmo, E. (2000). Spontaneous mutational effects on reproductive traits of  
502 *Arabidopsis thaliana*. Genetics 155, 369-378.
- 503 Slovak, R., Goschl, C., Su, X., Shimotani, K., Shiina, T., and Busch, W. (2014). A scalable open-source  
504 pipeline for large-scale root phenotyping of *Arabidopsis*. Plant Cell 26, 2390-2403.
- 505 Weigel, D. (2012). Natural variation in *Arabidopsis*: from molecular genetics to ecological genomics.  
506 Plant Physiol 158, 2-22.
- 507 Wilson, I., and Barton, N.H. (1995). Genealogies and geography. Philosophical transactions of the Royal  
508 Society of London Series B, Biological sciences 349, 49-59.
- 509 Yoshida, K., Schuenemann, V.J., Cano, L.M., Pais, M., Mishra, B., Sharma, R., Lanz, C., Martin, F.N.,  
510 Kamoun, S., Krause, J., et al. (2013). The rise and fall of the *Phytophthora infestans* lineage that  
511 triggered the Irish potato famine. eLife 2, e00731.
- 512



Table S1. Sample information, Related to Figure 1.

Latitude and longitude for historic samples were imputed from the geographic centroid of the most accurate toponym described in the herbarium specimen label.

Key of abbreviations of herbarium collections or seed sources:

UCONN = University of Connecticut herbarium; CFM = Chicago Field Museum;

NY = New York Botanical Garden; ABRC = Arabidopsis Biological Resources Center;

OSU = Ohio State University

H\* indicate herbarium samples that cluster with the modern HPG1 clade rather than the historic HPG1 clade in Fig. 3.

Geographic location highlighted in Fig. 1.

| Accession | Latitude (°N) | Longitude (°E) | State | Date collected | Alternative name | Collector/ Herbarium | Average coverage (x) |
|-----------|---------------|----------------|-------|----------------|------------------|----------------------|----------------------|
| JK399     | 38.7155       | -75.635591     | DE    | 1863           | 888124           | NY                   | 9                    |
| JK366     | 43.1921       | -77.0102       | NY    | 1866           | 888144           | NY                   | 6.8                  |
| JK395     | 38.9068       | -77.036667     | DC    | 1877           | 888134           | NY                   | 10.3                 |
| JK888141  | 40.732007     | -74.068455     | NJ    | 1879           | 888141           | NY                   | 42                   |
| JK389     | 38.9068       | -77.036667     | DC    | 1888           | 1365363          | NY                   | 9.9                  |
| JK362     | 38.9068       | -77.036667     | DC    | 1889           | 1365364          | NY                   | 8.8                  |
| JK367     | 40.9249       | -74.0755       | NJ    | 1890           | 1365344          | NY                   | 16.7                 |
| JK372     | 41.1222       | -74.3569       | NJ    | 1890           | 1365332          | NY                   | 14.8                 |
| JK1365354 | 38.8782       | -77.09048      | VA    | 1891           | 1365354          | NY                   | 36.4                 |
| JK376     | 39.97         | -83.01         | NY    | 1891           | 1365337          | NY                   | 12.3                 |
| JK351     | 41.15         | -73.766667     | NY    | 1894           | 1365333          | NY                   | 16.1                 |
| JK355     | 35.99         | -83.94         | TE    | 1896           | 1365374          | NY                   | 14.3                 |
| JK356     | n/a           | n/a            | GA    | 1897           | 1365375          | NY                   | 5.3                  |
| JK393     | n/a           | n/a            | NC    | 1897           | 1365370          | NY                   | 30.4                 |
| JK346     | 40.643136     | -111.95177     | UT    | 1903           | 102365           | NY                   | 29.1                 |
| JK2525    | 41.224343     | -73.06021      | CT    | 1904           | 79391            | UNCONN               | 12.5                 |
| JK2529    | n/a           | n/a            | OH    | 1904           | 176849           | CFM                  | 11.4                 |
| JK401     | 40.643136     | -111.95177     | UT    | 1904           | 102364           | NY                   | 10.4                 |
| JK2513    | 41.102121     | -81.560547     | OH    | 1911           | 25               | OSU                  | 18.2                 |
| JK2509    | n/a           | n/a            | CT    | 1917           | 11               | OSU                  | 15.1                 |
| JK2530    | 41.482862     | -86.822602     | IN    | 1922           | 531679           | CFM                  | 22.2                 |
| JK2526    | 41.666667     | -73.508455     | CT    | 1929           | 79409            | UNCONN               | 16.3                 |
| JK2515    | 41.137296     | -81.863779     | OH    | 1930           | 30               | OSU                  | 21.3                 |
| JK2511    | 41.721618     | -81.243317     | OH    | 1934           | 14               | OSU                  | 5.6                  |
| JK2523    | n/a           | n/a            | OH    | 1940           | 25707            | UNC                  | 13.1                 |

|         |           |            |    |      |             |        |      |
|---------|-----------|------------|----|------|-------------|--------|------|
| JK2520  | n/a       | n/a        | OH | 1945 | 54051       | UNC    | 20.3 |
| JK2524  | 39.856783 | -74.686954 | NJ | 1952 | 63978       | UNC    | 13.8 |
| JK2512  | 39.95607  | -81.953309 | OH | 1956 | 21          | OSU    | 16.7 |
| JK2514  | 39.95607  | -81.953309 | OH | 1969 | 27          | OSU    | 28.4 |
| JK2517  | n/a       | n/a        | OH | 1981 | 34          | OSU    | 21.7 |
| JK2521  | n/a       | n/a        | OH | 1992 | 565960      | UNC    | 2.9  |
| JK2518  | 41.867643 | -80.789021 | OH | 1993 | 40          | OSU    | 14.8 |
| JK2531  | 39.856783 | -74.686954 | NJ | 1952 | 1507461     | CFM    | 15.1 |
| JK2510  | 39.688861 | -82.993218 | OH | 1930 | 13          | OSU    | 21   |
| JK2527  | 41.509059 | -72.543694 | CT | 1975 | 79389       | UNCONN | 8.3  |
| JK2516  | 39.500862 | -82.472413 | OH | 1980 | 32          | OSU    | 18.1 |
| CSHL_15 | 40.8585   | -73.4675   | NY | 1993 | CSHL-15     | ABRC   | 39.3 |
| CSHL_17 | 40.8585   | -73.4675   | NY | 1993 | CSHL-17     | ABRC   | 41.5 |
| FM_10   | 42.4489   | -76.5072   | NY | 1993 | FM-10       | ABRC   | 44.6 |
| FM_11   | 42.4489   | -76.5072   | NY | 1993 | FM-11       | ABRC   | 44.4 |
| HS_12   | 42.373    | -71.0627   | MA | 1993 | HS-12       | ABRC   | 48.8 |
| HS_17   | 42.373    | -71.0627   | MA | 1993 | HS-17       | ABRC   | 55.3 |
| Kno_10  | 41.2816   | -86.621    | IN | 1993 | Kno-10      | ABRC   | 39.4 |
| KNO_15  | 41.2816   | -86.621    | IN | 1993 | KNO-15      | ABRC   | 43.6 |
| Gre_0   | 43.178    | -85.2532   | MI | 1995 | Gre-0       | ABRC   | 44.6 |
| Tul_0   | 43.2708   | -85.2563   | MI | 1995 | CS6877      | ABRC   | 31.2 |
| CS8067  | 41.3599   | -122.755   | CA | 1996 | uckhorn Pas | ABRC   | 66.4 |
| Tol_2   | 41.6639   | -83.5553   | OH | 1996 | CS8022      | ABRC   | 61   |
| Tol_3   | 41.6639   | -83.5553   | OH | 1996 | CS8023      | ABRC   | 40.2 |
| MIA_1   | 41.7976   | -86.6691   | MI | 1999 | MIA-1       | ABRC   | 73.1 |
| MIA_5   | 41.7976   | -86.6691   | MI | 1999 | MIA-5       | ABRC   | 62.9 |
| MIC_20  | 41.8266   | -86.4366   | MI | 1999 | MIC-20      | ABRC   | 39.9 |
| MIC_24  | 41.8266   | -86.4366   | MI | 1999 | MIC-24      | ABRC   | 33.8 |
| Brn_10  | 41.9      | -86.583    | MI | 2002 | Brn-10      | ABRC   | 33.3 |
| Brn_24  | 41.9      | -86.583    | MI | 2002 | Brn-24      | ABRC   | 38.4 |
| Haz_10  | 41.879    | -86.607    | MI | 2002 | Haz-10      | ABRC   | 33.8 |
| Haz_2   | 41.879    | -86.607    | MI | 2002 | Haz-2       | ABRC   | 39.7 |
| Ker_4   | 42.184    | -86.358    | MI | 2002 | Ker-4       | ABRC   | 32.1 |
| Ker_5   | 42.184    | -86.358    | MI | 2002 | Ker-5       | ABRC   | 62.9 |
| L_R_10  | 41.847    | -86.67     | MI | 2002 | L-R-10      | ABRC   | 22.4 |
| L_R_5   | 41.847    | -86.67     | MI | 2002 | L-R-5       | ABRC   | 60.6 |
| Lak_12  | 41.8      | -86.67     | MI | 2002 | Lak-12      | ABRC   | 37.8 |
| Lak_13  | 41.8      | -86.67     | MI | 2002 | Lak-13      | ABRC   | 28.5 |
| Map_35  | 42.166    | -86.412    | MI | 2002 | Map-35      | ABRC   | 64.7 |
| Map_42  | 42.166    | -86.412    | MI | 2002 | Map-42      | ABRC   | 46   |
| Map_8   | 42.166    | -86.412    | MI | 2002 | Map-8       | ABRC   | 33.4 |
| Mdn_10  | 42.051    | -86.509    | MI | 2002 | Mdn-10      | ABRC   | 34.9 |
| Mdn_8   | 42.051    | -86.509    | MI | 2002 | Mdn-8       | ABRC   | 37.4 |
| Paw_13  | 42.148    | -86.431    | MI | 2002 | Paw-13      | ABRC   | 43   |
| Paw_20  | 42.148    | -86.431    | MI | 2002 | Paw-20      | ABRC   | 41.3 |
| Riv_25  | 42.184    | -86.382    | MI | 2002 | Riv-25      | ABRC   | 36.8 |
| Riv_26  | 42.184    | -86.382    | MI | 2002 | Riv-26      | ABRC   | 35.7 |

|             |         |          |    |      |            |      |       |
|-------------|---------|----------|----|------|------------|------|-------|
| Yng_4       | 41.865  | -86.646  | MI | 2002 | Yng-4      | ABRC | 41.3  |
| Yng_53      | 41.865  | -86.646  | MI | 2002 | Yng-53     | ABRC | 46    |
| RRS_10      | 41.5609 | -86.4251 | IN | 2003 | RRS-10     | ABRC | 41.8  |
| DuckLkSP38  | 43.3431 | -86.4045 | MI | 2004 | DuckLkSP38 | ABRC | 37.1  |
| DuckLkSP40  | 43.3431 | -86.4045 | MI | 2004 | DuckLkSP40 | ABRC | 39.6  |
| KBS_Mac_68  | 42.405  | -85.398  | MI | 2004 | KBS-Mac-68 | ABRC | 41.3  |
| KBS_Mac_74  | 42.405  | -85.398  | MI | 2004 | KBS-Mac-74 | ABRC | 37.7  |
| MNF_Che_47  | 43.5251 | -86.1843 | MI | 2004 | MNF-Che-47 | ABRC | 27.6  |
| MNF_Che_49  | 43.5251 | -86.1843 | MI | 2004 | MNF-Che-49 | ABRC | 28.5  |
| MNF_Pin_40  | 43.5356 | -86.1788 | MI | 2004 | MNF-Pin-40 | ABRC | 47.9  |
| MNF_Pot_10  | 43.595  | -86.2657 | MI | 2004 | MNF-Pot-10 | ABRC | 61.4  |
| MNF_Pot_15  | 43.595  | -86.2657 | MI | 2004 | MNF-Pot-15 | ABRC | 25.2  |
| MSGA_10     | 43.2749 | -86.0891 | MI | 2004 | MSGA-10    | ABRC | 41.9  |
| MSGA_12     | 43.2749 | -86.0891 | MI | 2004 | MSGA-12    | ABRC | 42.8  |
| MSGA_61     | 43.2749 | -86.0891 | MI | 2004 | MSGA-61    | ABRC | 45.5  |
| MuskSP_68   | 43.2483 | -86.3368 | MI | 2004 | MuskSP-68  | ABRC | 25.8  |
| MuskSP_83   | 43.2483 | -86.3368 | MI | 2004 | MuskSP-83  | ABRC | 29.9  |
| Pent_46     | 43.7623 | -86.3929 | MI | 2004 | Pent-46    | ABRC | 48.3  |
| Pent_7      | 43.7623 | -86.3929 | MI | 2004 | Pent-7     | ABRC | 55.7  |
| SLSP_67     | 43.665  | -86.496  | MI | 2004 | SLSP-67    | ABRC | 53.5  |
| SLSP_69     | 43.665  | -86.496  | MI | 2004 | SLSP-69    | ABRC | 35.5  |
| KNO2_41     | 41.273  | -86.625  | IN | 2005 | KNO2.41    | ABRC | 44.7  |
| KNO2_54     | 41.273  | -86.625  | IN | 2005 | KNO2.54    | ABRC | 44    |
| LI_EF_011   | 40.9064 | -73.1493 | NY | 2005 | LI-EF-011  | ABRC | 68.6  |
| LI_EF_018   | 40.9064 | -73.1493 | NY | 2005 | LI-EF-018  | ABRC | 39    |
| LI_OF_061   | 40.7777 | -72.9069 | NY | 2005 | LI-OF-061  | ABRC | 58    |
| LI_RR_096   | 40.9447 | -72.8615 | NY | 2005 | LI-RR-096  | ABRC | 63.5  |
| LI_RR_097   | 40.9447 | -72.8615 | NY | 2005 | LI-RR-097  | ABRC | 40.8  |
| LI_SET_019  | 40.9352 | -73.114  | NY | 2005 | LI-SET-019 | ABRC | 29.9  |
| LI_SET_036  | 40.9352 | -73.114  | NY | 2005 | LI-SET-036 | ABRC | 41.5  |
| LI_WP_039   | 40.9076 | -73.2089 | NY | 2005 | LI-WP-039  | ABRC | 104.8 |
| LI_WP_041   | 40.9076 | -73.2089 | NY | 2005 | LI-WP-041  | ABRC | 76.5  |
| PT1_52      | 41.3423 | -86.7368 | IN | 2005 | PT1.52     | ABRC | 50.6  |
| PT1_85      | 41.3423 | -86.7368 | IN | 2005 | PT1.85     | ABRC | 46.1  |
| RMX4_118    | 42.036  | -86.511  | MI | 2005 | RMX4.118   | ABRC | 41.8  |
| 11PNA1_14   | 42.0945 | -86.3253 | MI | 2006 | 11PNA1.14  | ABRC | 47.5  |
| 328PNA062   | 42.0945 | -86.3253 | MI | 2006 | 328PNA062  | ABRC | 47.3  |
| 627ME_13Y1  | 42.093  | -86.359  | MI | 2006 | n/a        | ABRC | 53.4  |
| 627ME_1MI1  | 42.093  | -86.359  | MI | 2006 | 627ME-1MI1 | ABRC | 57.8  |
| 327RMX_1MN4 | 42.0333 | -86.5128 | MI | 2006 | n/a        | ABRC | 43.6  |
| 327RMX_1MN5 | 42.0333 | -86.5128 | MI | 2006 | n/a        | ABRC | 50.6  |
| BRR107      | 40.8313 | -87.735  | IL | 2006 | BRR107     | ABRC | 28.5  |
| BRR12       | 40.8313 | -87.735  | IL | 2006 | BRR12      | ABRC | 43.9  |
| BRR23       | 40.8313 | -87.735  | IL | 2006 | BRR23      | ABRC | 30.7  |
| BRR4        | 40.8313 | -87.735  | IL | 2006 | BRR4       | ABRC | 44.7  |
| BRR57       | 40.8313 | -87.735  | IL | 2006 | BRR57      | ABRC | 28.4  |
| BRR60       | 40.8313 | -87.735  | IL | 2006 | BRR60      | ABRC | 42.9  |
| KEN         | 41.767  | -72.677  | CT | n/a  | KEN        | ABRC | 55.2  |
| LP3413_31   | 41.6862 | -86.8513 | IN | n/a  | LP3413.31  | ABRC | 55.9  |

|           |         |          |    |     |           |      |      |
|-----------|---------|----------|----|-----|-----------|------|------|
| LP3413_53 | 41.6862 | -86.8513 | IN | n/a | LP3413.53 | ABRC | 51.2 |
| RMX413_85 | 42.036  | -86.511  | MI | NA  | RMX413.85 | ABRC | 38   |

---

Table S1 (cont'd)

| Number of covered positions (≥3x) (mapped against HPG1 reference) | Number of covered positions (≥3x) (mapped against Col_0 reference) | SNPs vs_ HPG1 reference | Belongs to HPG1 | Modern/ Herbarium | Column number in the available genome matrix |
|-------------------------------------------------------------------|--------------------------------------------------------------------|-------------------------|-----------------|-------------------|----------------------------------------------|
| 105,053,631                                                       | 99,889,683                                                         | 142                     | yes             | H                 | 101                                          |
| 100,379,839                                                       | 95,118,236                                                         | 123                     | yes             | H                 | 94                                           |
| 103,620,791                                                       | 98,888,406                                                         | 167                     | yes             | H                 | 100                                          |
| 107,211,409                                                       | 102,634,255                                                        | 161                     | yes             | H                 | 103                                          |
| 106,042,465                                                       | 100,826,958                                                        | 151                     | yes             | H                 | 98                                           |
| 103,997,716                                                       | 98,876,320                                                         | 153                     | yes             | H                 | 93                                           |
| 107,236,732                                                       | 102,176,782                                                        | 181                     | yes             | H                 | 95                                           |
| 106,285,178                                                       | 101,480,369                                                        | 163                     | yes             | H                 | 96                                           |
| 106,718,326                                                       | 102,458,166                                                        | 169                     | yes             | H                 | 88                                           |
| 105,962,154                                                       | 100,840,125                                                        | 145                     | yes             | H                 | 97                                           |
| 106,531,302                                                       | 101,841,156                                                        | 153                     | yes             | H                 | 90                                           |
| 106,391,637                                                       | 101,455,311                                                        | 192                     | yes             | H                 | 91                                           |
| 90,426,010                                                        | 89,296,191                                                         | n/a                     | no              | H                 | 92                                           |
| 102,894,430                                                       | 101,298,068                                                        | n/a                     | no              | H                 | 99                                           |
| 107,223,283                                                       | 102,450,446                                                        | 222                     | yes             | H                 | 89                                           |
| 105,025,845                                                       | n/a                                                                | 138                     | yes             | H                 | 118                                          |
| 100,620,441                                                       | n/a                                                                | n/a                     | no              | H                 | 121                                          |
| 99,572,736                                                        | 94,661,828                                                         | 216                     | yes             | H                 | 102                                          |
| 106,309,854                                                       | n/a                                                                | 176                     | yes             | H                 | 108                                          |
| 102,169,546                                                       | n/a                                                                | n/a                     | no              | H                 | 104                                          |
| 107,043,540                                                       | n/a                                                                | 161                     | yes             | H                 | 122                                          |
| 107,026,827                                                       | n/a                                                                | 161                     | yes             | H                 | 119                                          |
| 106,893,416                                                       | n/a                                                                | 193                     | yes             | H                 | 110                                          |
| 95,822,372                                                        | n/a                                                                | 109                     | yes             | H                 | 106                                          |
| 101,421,749                                                       | n/a                                                                | n/a                     | no              | H                 | 116                                          |

|             |             |     |     |    |     |
|-------------|-------------|-----|-----|----|-----|
| 102,831,697 | n/a         | n/a | no  | H  | 114 |
| 100,778,282 | n/a         | n/a | no  | H  | 117 |
| 106,801,844 | n/a         | 189 | yes | H  | 107 |
| 107,044,415 | n/a         | 219 | yes | H  | 109 |
| 102,643,436 | n/a         | n/a | no  | H  | 112 |
| 62,673,938  | n/a         | n/a | no  | H  | 115 |
| 106,578,197 | n/a         | 177 | yes | H  | 113 |
| 106,158,181 | n/a         | 177 | yes | H* | 123 |
| 106,305,970 | n/a         | 178 | yes | H* | 105 |
| 104,089,205 | n/a         | 200 | yes | H* | 120 |
| 106,464,569 | n/a         | 198 | yes | H* | 111 |
| 108,189,771 | 105,955,885 | 243 | yes | M  | 16  |
| 108,194,960 | 105,982,511 | 240 | yes | M  | 17  |
| 108,203,215 | 106,052,866 | 269 | yes | M  | 20  |
| 108,214,008 | 106,040,276 | 288 | yes | M  | 21  |
| 108,230,030 | 106,124,249 | 251 | yes | M  | 25  |
| 108,242,062 | 106,155,362 | 254 | yes | M  | 26  |
| 108,198,601 | 105,985,288 | 226 | yes | M  | 32  |
| 108,219,683 | 106,069,077 | 231 | yes | M  | 33  |
| 108,209,345 | 106,032,827 | 207 | yes | M  | 22  |
| 108,140,393 | 105,806,418 | 221 | yes | M  | 85  |
| 108,260,489 | 106,243,277 | 294 | yes | M  | 15  |
| 108,241,333 | 106,194,209 | 238 | yes | M  | 83  |
| 108,184,749 | 105,953,559 | 232 | yes | M  | 84  |
| 108,279,881 | 106,291,612 | 234 | yes | M  | 56  |
| 108,263,557 | 106,250,560 | 235 | yes | M  | 57  |
| 108,200,416 | 106,010,135 | 237 | yes | M  | 58  |
| 108,176,527 | 105,728,326 | 237 | yes | M  | 59  |
| 108,177,381 | 105,905,097 | 243 | yes | M  | 7   |
| 108,208,482 | 105,951,803 | 228 | yes | M  | 8   |
| 108,154,100 | 105,903,700 | 230 | yes | M  | 23  |
| 108,201,103 | 106,004,251 | 288 | yes | M  | 24  |
| 108,132,127 | 105,806,486 | 261 | yes | M  | 30  |
| 108,259,905 | 106,246,278 | 259 | yes | M  | 31  |
| 108,062,944 | 105,496,224 | 186 | yes | M  | 49  |
| 108,255,795 | 106,209,826 | 299 | yes | M  | 50  |
| 108,176,901 | 105,775,999 | 237 | yes | M  | 36  |
| 107,955,559 | 105,553,559 | 226 | yes | M  | 37  |
| 108,265,863 | 106,224,216 | 290 | yes | M  | 51  |
| 107,303,032 | 106,093,945 | n/a | no  | M  | 52  |
| 108,155,999 | 105,921,907 | 287 | yes | M  | 53  |
| 108,106,772 | 105,906,924 | n/a | no  | M  | 54  |
| 108,199,679 | 105,940,666 | 266 | yes | M  | 55  |
| 108,159,739 | 105,980,721 | 267 | yes | M  | 70  |
| 108,218,762 | 106,059,867 | 241 | yes | M  | 71  |
| 108,186,632 | 105,779,717 | 273 | yes | M  | 76  |
| 108,194,281 | 105,958,738 | 260 | yes | M  | 77  |

|             |             |     |     |   |    |
|-------------|-------------|-----|-----|---|----|
| 108,182,789 | 106,000,003 | 289 | yes | M | 86 |
| 108,230,553 | 106,125,861 | 191 | yes | M | 87 |
| 108,208,144 | 106,033,465 | 274 | yes | M | 80 |
| 108,171,751 | 105,932,415 | 253 | yes | M | 18 |
| 108,204,654 | 105,969,244 | 257 | yes | M | 19 |
| 108,181,390 | 105,870,424 | 259 | yes | M | 27 |
| 108,160,645 | 105,801,702 | 265 | yes | M | 28 |
| 108,093,393 | 105,596,885 | 281 | yes | M | 60 |
| 108,082,202 | 105,661,610 | 274 | yes | M | 61 |
| 108,238,775 | 106,099,919 | 287 | yes | M | 62 |
| 108,189,553 | 106,228,588 | n/a | no  | M | 63 |
| 108,543,185 | 107,022,924 | n/a | no  | M | 64 |
| 108,191,659 | 106,019,404 | 233 | yes | M | 65 |
| 108,227,214 | 106,032,928 | 240 | yes | M | 66 |
| 108,210,152 | 106,077,183 | 247 | yes | M | 67 |
| 108,063,297 | 105,588,467 | 215 | yes | M | 68 |
| 108,099,368 | 105,721,042 | 222 | yes | M | 69 |
| 108,227,763 | 106,099,890 | 238 | yes | M | 72 |
| 108,220,625 | 106,144,167 | 240 | yes | M | 73 |
| 108,238,880 | 106,143,530 | 245 | yes | M | 81 |
| 108,160,835 | 105,899,252 | 249 | yes | M | 82 |
| 108,209,694 | 106,063,235 | 219 | yes | M | 34 |
| 108,212,430 | 105,903,373 | 218 | yes | M | 35 |
| 108,267,109 | 106,250,331 | 259 | yes | M | 38 |
| 108,244,306 | 105,898,497 | 230 | yes | M | 39 |
| 104,897,841 | 105,729,196 | n/a | no  | M | 40 |
| 108,264,679 | 106,251,487 | 261 | yes | M | 41 |
| 108,211,310 | 105,992,095 | 249 | yes | M | 42 |
| 108,085,297 | 105,737,781 | 259 | yes | M | 43 |
| 108,216,592 | 106,006,605 | 238 | yes | M | 44 |
| 108,301,282 | 106,273,259 | 239 | yes | M | 45 |
| 108,287,248 | 106,322,146 | 235 | yes | M | 46 |
| 108,240,431 | 106,154,252 | 219 | yes | M | 74 |
| 108,220,150 | 106,097,633 | 233 | yes | M | 75 |
| 106,178,554 | 105,685,651 | n/a | no  | M | 78 |
| 108,227,783 | 106,133,372 | 276 | yes | M | 1  |
| 108,221,709 | 106,127,272 | 223 | yes | M | 2  |
| 107,908,679 | 106,148,671 | n/a | no  | M | 3  |
| 108,252,617 | 106,173,403 | 281 | yes | M | 4  |
| 106,799,549 | 105,789,469 | n/a | no  | M | 5  |
| 106,885,430 | 105,897,441 | n/a | no  | M | 6  |
| 108,896,513 | 107,320,745 | n/a | no  | M | 9  |
| 108,190,572 | 106,031,493 | 232 | yes | M | 10 |
| 108,095,072 | 105,726,913 | 236 | yes | M | 11 |
| 108,180,840 | 106,033,507 | 219 | yes | M | 12 |
| 108,093,033 | 105,630,963 | 225 | yes | M | 13 |
| 108,281,285 | 106,199,572 | 229 | yes | M | 14 |
| 108,233,232 | 106,158,223 | 249 | yes | M | 29 |
| 108,244,332 | 106,190,596 | 227 | yes | M | 47 |

|             |             |     |     |   |    |
|-------------|-------------|-----|-----|---|----|
| 108,157,453 | 105,994,665 | 245 | yes | M | 48 |
| 106,816,221 | 105,483,632 | n/a | no  | M | 79 |

---



Table S2. Sample information for Col-0 mutation accumulation lines. Related to Figure 3.

| Line                  | Read depth | Gene-ration | Total | SNPs | Dele-tions | inser-tions | CDS      | Non-syn | Syn | Intron     | 5' UTR    | 3' UTR    |
|-----------------------|------------|-------------|-------|------|------------|-------------|----------|---------|-----|------------|-----------|-----------|
| 0-4-26                | 57         | 3           | 7     | 6    | 1          | 0           | 0        | 0       | 0   | 0          | 0         | 0         |
| 0-8-87                | 49         | 3           | 7     | 5    | 0          | 2           | 1        | 1       | 0   | 1          | 0         | 0         |
| 30-109                | 45         | 31          | 31    | 23   | 7          | 1           | 3        | 3       | 0   | 3          | 0         | 0         |
| 30-119                | 45         | 31          | 33    | 26   | 2          | 5           | 1        | 1       | 0   | 1          | 2         | 0         |
| 30-29                 | 51         | 31          | 39    | 26   | 10         | 3           | 2        | 1       | 1   | 3          | 0         | 1         |
| 30-39                 | 48         | 31          | 28    | 18   | 7          | 3           | 1        | 1       | 0   | 1          | 0         | 1         |
| 30-49                 | 50         | 31          | 30    | 23   | 3          | 4           | 4        | 4       | 0   | 0          | 0         | 0         |
| 30-59                 | 40         | 31          | 46    | 31   | 8          | 7           | 5        | 2       | 3   | 2          | 0         | 0         |
| 30-69                 | 50         | 31          | 26    | 21   | 3          | 2           | 4        | 3       | 1   | 1          | 1         | 1         |
| 30-79                 | 50         | 31          | 31    | 25   | 3          | 3           | 6        | 4       | 2   | 2          | 0         | 0         |
| 30-89                 | 39         | 31          | 35    | 27   | 5          | 3           | 4        | 3       | 1   | 1          | 1         | 0         |
| 30-99                 | 44         | 31          | 37    | 35   | 1          | 1           | 6        | 5       | 1   | 2          | 0         | 2         |
| average (31st)        |            |             | 33.6  | 25.5 | 4.9        | 3.2         | 3.6      | 2.7     | 0.9 | 1.6        | 0.4       | 0.5       |
| stdev (31st)          |            |             | 5.9   | 4.9  | 3.0        | 1.8         | 1.8      | 1.4     | 1.0 | 1.0        | 0.7       | 0.7       |
| Total bases in genome |            |             | ##### |      |            |             | 30753966 |         |     | 17,446,837 | 4,289,789 | 2,508,199 |

Table S3. Mutation rate estimates for different annotations in HPG1 and mutation accumulation lines. Related to Figure 3.

| Dataset                  | Parameter   | CDS   | Intron | 5' UTR | 3' UTR | TE     | intergeni |
|--------------------------|-------------|-------|--------|--------|--------|--------|-----------|
| MAL                      | mean        | 3.776 | 2.958  | 3.008  | 6.431  | 17.752 | 9.592     |
| MAL                      | sem         | 1.928 | 1.786  | 5.258  | 9.094  | 7.420  | 2.628     |
| MAL                      | lower 95CI. | 4.971 | 4.065  | 6.267  | 12.067 | 22.351 | 11.221    |
| MAL                      | upper 95CI. | 2.581 | 1.851  | -0.251 | 0.794  | 13.153 | 7.964     |
| HPG1                     | mean        | 2.945 | 2.060  | -2.782 | -2.137 | 3.745  | 4.914     |
| HPG1                     | sem         | 0.157 | 0.210  | 0.481  | 0.424  | 0.849  | 0.291     |
| HPG1                     | lower 95CI. | 2.637 | 1.648  | -3.725 | -2.968 | 2.080  | 4.343     |
| HPG1                     | upper 95CI. | 3.254 | 2.471  | -1.838 | -1.306 | 5.411  | 5.486     |
| IPG1 1.3 years/generatio | mean        | 3.829 | 2.678  | -3.616 | -2.778 | 4.869  | 6.388     |
| IPG1 1.3 years/generatio | sem         | 0.204 | 0.273  | 0.626  | 0.551  | 1.104  | 0.379     |
| IPG1 1.3 years/generatio | lower 95CI. | 3.428 | 2.143  | -4.843 | -3.858 | 2.704  | 5.645     |
| IPG1 1.3 years/generatio | upper 95CI. | 4.230 | 3.213  | -2.389 | -1.697 | 7.034  | 7.131     |

Table 45. Description of phenotypic and climatic variables for association mapping analyses. Related to Figure 5. Mean and standard deviation across accessions for each phenotypic and climatic variable. Broad sense heritabilities (H2) calculated from between line and within line (between replicate) variance in ANOVA framework. Narrow sense heritability (h2) calculated employing linear mixed models and Kinship matrix from mean accession values.

| Variable      | Description                                                                                                                                    | mean   | s.d.   | H2    | p-value   |
|---------------|------------------------------------------------------------------------------------------------------------------------------------------------|--------|--------|-------|-----------|
| FT_V0         | Time from germination to the first flower opens (days) under 0 days of vernalization                                                           | 101    | 4.53   | 0.009 | 7.28E-03  |
| FT_V1         | Time from germination to the first flower opens (days) under 14 days of vernalization                                                          | 107    | 4.12   | 0.013 | 6.87E-04  |
| FT_V2         | Time from germination to the first flower opens (days) under 28 days of vernalization                                                          | 102    | 3.22   | 0.012 | 1.04E-03  |
| FT_V3         | Time from germination to the first flower opens (days) under 63 days of vernalization                                                          | 110    | 1.32   | 0.010 | 5.11E-03  |
| B_V0          | Time from germination to the first developed bud (days) under 0 days of vernalization                                                          | 88.8   | 4      | 0.013 | 8.99E-04  |
| B_V1          | Time from germination to the first developed bud (days) under 14 days of vernalization                                                         | 93.9   | 3.84   | 0.009 | 7.45E-03  |
| B_V2          | Time from germination to the first developed bud (days) under 28 days of vernalization                                                         | 89.2   | 2.13   | 0.005 | 6.92E-02  |
| B_V3          | Time from germination to the first developed bud (days) under 63 days of vernalization                                                         | 101    | 0.45   | 0.006 | 5.79E-02  |
| Fecundity     | Pixel area of inflorescence (correlation with number of fruits, rho=0.84)                                                                      | 0.0197 | 0.0042 | 0.001 | 3.56E-01  |
| seed_size     | Average seed size (mm <sup>2</sup> )                                                                                                           | 0.134  | 0.0053 | 0.998 | 3.48E-123 |
| GR_rootLength | Average root growth rate                                                                                                                       | 181    | 14.9   | 0.131 | 4.76E-77  |
| GR_shootArea  | Average of shoot area growth rate                                                                                                              | 2279   | 253    | 0.053 | 2.33E-24  |
| rootLength    | Average root length                                                                                                                            | 467    | 35.8   | 0.048 | 2.01E-21  |
| dirEquivalent | Average root direction index. Score for average pixel-by-pixel deviations from growth relative to vector of gravity                            | 0.393  | 0.0277 | 0.059 | 2.62E-28  |
| stdDevXY      | Average root linearity coefficient of linear determination; R <sup>2</sup> of linear regression line fitted to pixels of primary root skeleton | 0.725  | 0.0429 | 0.018 | 4.54E-06  |
| meanRootWidth | Average root width                                                                                                                             | 5.27   | 0.177  | 0.038 | 5.30E-16  |
| rootWidth20   | Average width over first interval of the primary root length (0 to 20%) at hypocotyl/root junction                                             | 5.75   | 0.124  | 0.018 | 5.11E-06  |
| rootWidth40   | Average width over first interval of the primary root length (20 to 40%) at hypocotyl/root junction                                            | 5.35   | 0.19   | 0.033 | 3.87E-13  |

|                  |                                                                                                             |       |        |       |          |
|------------------|-------------------------------------------------------------------------------------------------------------|-------|--------|-------|----------|
| rootWidth60      | Average width over first interval of the primary root length (40 to 60%) at hypocotyl/root junction         | 5.2   | 0.212  | 0.039 | 1.49E-16 |
| rootWidth80      | Average width over first interval of the primary root length (60 to 80%) at hypocotyl/root junction         | 5.11  | 0.241  | 0.045 | 4.67E-20 |
| rootWidth100     | Average width over first interval of the primary root length (80 to 100%) at hypocotyl/root junction        | 4.9   | 0.222  | 0.038 | 4.06E-16 |
| gravitropicDir   | Average root angle between root vector and the vertical axis of the picture (assumed vector of gravity) (°) | -7.22 | 2.56   | 0.024 | 7.69E-09 |
| gravitropicScore | Average score for root angle intervals                                                                      | 0.1   | 0.0457 | 0.044 | 2.83E-19 |
| TotLen.EucLen    | Average root tortuosity: Total root length divided by Euclidian length                                      | 1.1   | 0.0097 | 0.009 | 6.83E-03 |
| GR.TL            | Average relative root growth rate: Root growth rate divided by total length at the earlier time point       | 0.673 | 0.0796 | 0.011 | 1.20E-03 |
| BIO1             | Annual Mean Temperature (°C x 10)                                                                           | 98.1  | 12.8   | NaN   | NaN      |
| BIO2             | Mean Diurnal Range (Mean of monthly (max temp - min temp))                                                  | 107   | 7.65   | NaN   | NaN      |
| BIO3             | Isothermality (BIO2/BIO7) (* 100)                                                                           | 28.9  | 1.8    | NaN   | NaN      |
| BIO4             | Temperature Seasonality (standard deviation *100)                                                           | 9169  | 483    | NaN   | NaN      |
| BIO5             | Max Temperature of Warmest Month (°C x 10)                                                                  | 283   | 10.1   | NaN   | NaN      |
| BIO6             | Min Temperature of Coldest Month (°C x 10)                                                                  | -80.9 | 18     | NaN   | NaN      |
| BIO7             | Temperature Annual Range (BIO5-BIO6) (°C x 10)                                                              | 364   | 17.5   | NaN   | NaN      |
| BIO8             | Mean Temperature of Wettest Quarter (°C x 10)                                                               | 176   | 55.1   | NaN   | NaN      |
| BIO9             | Mean Temperature of Driest Quarter (°C x 10)                                                                | -7.11 | 48.7   | NaN   | NaN      |
| BIO10            | Mean Temperature of Warmest Quarter (°C x 10)                                                               | 213   | 10.8   | NaN   | NaN      |
| BIO11            | Mean Temperature of Coldest Quarter (°C x 10)                                                               | -24.1 | 18.2   | NaN   | NaN      |
| BIO12            | Annual Precipitation (mm)                                                                                   | 990   | 109    | NaN   | NaN      |
| BIO13            | Precipitation of Wettest Month (mm)                                                                         | 103   | 6.72   | NaN   | NaN      |
| BIO14            | Precipitation of Driest Month (mm)                                                                          | 54.1  | 16.7   | NaN   | NaN      |
| BIO15            | Precipitation Seasonality (Coefficient of Variation)                                                        | 17.8  | 5.51   | NaN   | NaN      |
| BIO16            | Precipitation of Wettest Quarter (mm)                                                                       | 291   | 19.7   | NaN   | NaN      |
| BIO17            | Precipitation of Driest Quarter (mm)                                                                        | 191   | 44.8   | NaN   | NaN      |
| BIO18            | Precipitation of Warmest Quarter (mm)                                                                       | 277   | 25.2   | NaN   | NaN      |
| BIO19            | Precipitation of Coldest Quarter (mm)                                                                       | 197   | 47     | NaN   | NaN      |

Table 56. SNP hits from association mapping. Related to Table 1.

| Trait type | Trait           | Chromosome | Position | Ancestral | Derived | Effect  | Effect standard error | Sample size | p - value | p - value genome control corrected | p - value false discovery rate corrected | p - value permutation corrected | Ancestral allele count | Derived allele count | Allele frequency |
|------------|-----------------|------------|----------|-----------|---------|---------|-----------------------|-------------|-----------|------------------------------------|------------------------------------------|---------------------------------|------------------------|----------------------|------------------|
| pheno.     | GR_rootLength   | 1          | 12638692 | C         | T       | -12.100 | 3.164                 | 63          | #####     | 0.014966                           | 0.00373                                  | 0.003                           | 94                     | 9                    | 0.0              |
| pheno.     | GR_shootArea    | 1          | 12638692 | C         | T       | #####   | #####                 | 63          | #####     | 0.018191                           | 0.00049                                  | 0.000999                        | 94                     | 9                    | 0.0              |
| pheno.     | GR_rootLength   | 1          | 13652509 | C         | A       | -12.100 | 3.164                 | 63          | #####     | 0.014966                           | 0.00373                                  | 0.003                           | 88                     | 9                    | 0.0              |
| pheno.     | GR_shootArea    | 1          | 13652509 | C         | A       | #####   | #####                 | 63          | #####     | 0.018191                           | 0.00049                                  | 0.000999                        | 88                     | 9                    | 0.0              |
| pheno.     | dirEquivalent   | 1          | 19024876 | C         | T       | -0.014  | 0.004                 | 63          | #####     | 0.040944                           | 0.00518                                  | 0.018                           | 81                     | 19                   | 0.0              |
| pheno.     | GR_shootArea    | 1          | 20324050 | G         | A       | #####   | #####                 | 63          | #####     | 0.018191                           | 0.00049                                  | 0.000999                        | 94                     | 9                    | 0.0              |
| pheno.     | GR_rootLength   | 1          | 20324050 | G         | A       | -12.100 | 3.164                 | 63          | #####     | 0.014966                           | 0.00373                                  | 0.003                           | 94                     | 9                    | 0.0              |
| pheno.     | dirEquivalent   | 1          | 26052913 | A         | T       | -0.014  | 0.004                 | 63          | #####     | 0.040944                           | 0.00518                                  | 0.018                           | 84                     | 19                   | 0.1              |
| pheno.     | GR_shootArea    | 1          | 29696198 | G         | A       | #####   | #####                 | 63          | #####     | 0.050091                           | 0.00958                                  | 0.016                           | 70                     | 27                   | 0.2              |
| pheno.     | GR_rootLength   | 1          | 30015381 | T         | A       | -12.100 | 3.164                 | 63          | #####     | 0.014966                           | 0.00373                                  | 0.003                           | 94                     | 9                    | 0.0              |
| pheno.     | GR_shootArea    | 1          | 30015381 | T         | A       | #####   | #####                 | 63          | #####     | 0.018191                           | 0.00049                                  | 0.000999                        | 94                     | 9                    | 0.0              |
| pheno.     | GR_rootLength   | 1          | 30143319 | G         | A       | -12.100 | 3.164                 | 63          | #####     | 0.014966                           | 0.00373                                  | 0.003                           | 93                     | 9                    | 0.0              |
| pheno.     | GR_shootArea    | 1          | 30143319 | G         | A       | #####   | #####                 | 63          | #####     | 0.018191                           | 0.00049                                  | 0.000999                        | 93                     | 9                    | 0.0              |
| pheno.     | dirEquivalent   | 1          | 958948   | G         | T       | -0.014  | 0.004                 | 63          | #####     | 0.040944                           | 0.00518                                  | 0.018                           | 83                     | 19                   | 0.1              |
| pheno.     | gravitropicScor | 1          | 9925177  | C         | T       | 0.033   | 0.010                 | 63          | #####     | 0.016078                           | 0.06509                                  | 0.016                           | 95                     | 8                    | 0.0              |
| pheno.     | dirEquivalent   | 2          | 10369545 | T         | C       | -0.016  | 0.004                 | 63          | #####     | 0.022915                           | 0.00322                                  | 0.006                           | 83                     | 20                   | 0.1              |
| pheno.     | dirEquivalent   | 2          | 10495275 | A         | C       | -0.016  | 0.004                 | 63          | #####     | 0.022915                           | 0.00322                                  | 0.006                           | 82                     | 20                   | 0.1              |
| pheno.     | dirEquivalent   | 2          | 1093203  | C         | T       | -0.016  | 0.004                 | 63          | #####     | 0.022915                           | 0.00322                                  | 0.006                           | 83                     | 20                   | 0.1              |
| pheno.     | dirEquivalent   | 2          | 11346211 | C         | A       | -0.014  | 0.004                 | 63          | #####     | 0.040944                           | 0.00518                                  | 0.018                           | 83                     | 19                   | 0.1              |
| pheno.     | dirEquivalent   | 2          | 12415084 | T         | A       | -0.014  | 0.004                 | 63          | #####     | 0.040944                           | 0.00518                                  | 0.018                           | 83                     | 19                   | 0.1              |
| pheno.     | dirEquivalent   | 2          | 12876361 | A         | C       | -0.015  | 0.004                 | 63          | #####     | 0.025674                           | 0.00406                                  | 0.006                           | 76                     | 27                   | 0.2              |
| pheno.     | gravitropicScor | 2          | 12876361 | A         | C       | -0.021  | 0.006                 | 63          | #####     | 0.020114                           | 0.06509                                  | 0.027                           | 76                     | 27                   | 0.2              |

|        |               |   |          |   |   |         |       |    |       |          |         |          |    |    |     |
|--------|---------------|---|----------|---|---|---------|-------|----|-------|----------|---------|----------|----|----|-----|
| pheno. | dirEquivalent | 2 | 15278350 | A | G | -0.014  | 0.004 | 63 | ##### | 0.040944 | 0.00518 | 0.018    | 83 | 19 | 0.1 |
| pheno. | GR_shootArea  | 2 | 16039488 | T | G | #####   | ##### | 63 | ##### | 0.018191 | 0.00049 | 0.000999 | 94 | 9  | 0.0 |
| pheno. | GR_rootLengt  | 2 | 16039488 | T | G | -12.100 | 3.164 | 63 | ##### | 0.014966 | 0.00373 | 0.003    | 94 | 9  | 0.0 |
| pheno. | GR_rootLengt  | 2 | 16247290 | G | T | -12.100 | 3.164 | 63 | ##### | 0.014966 | 0.00373 | 0.003    | 93 | 9  | 0.0 |
| pheno. | GR_shootArea  | 2 | 16247290 | G | T | #####   | ##### | 63 | ##### | 0.018191 | 0.00049 | 0.000999 | 93 | 9  | 0.0 |
| pheno. | dirEquivalent | 2 | 16333662 | G | A | -0.014  | 0.004 | 63 | ##### | 0.040944 | 0.00518 | 0.018    | 83 | 19 | 0.1 |
| pheno. | dirEquivalent | 2 | 2176891  | T | C | -0.016  | 0.004 | 63 | ##### | 0.022915 | 0.00322 | 0.006    | 83 | 20 | 0.1 |
| pheno. | GR_rootLengt  | 2 | 3174832  | T | A | 6.340   | 1.869 | 63 | ##### | 0.030786 | 0.01703 | 0.017    | 48 | 54 | 0.5 |
| pheno. | dirEquivalent | 2 | 358395   | C | T | -0.016  | 0.004 | 63 | ##### | 0.022915 | 0.00322 | 0.006    | 83 | 20 | 0.1 |
| pheno. | TotLen.EucLer | 2 | 5285907  | C | A | -0.006  | 0.002 | 63 | ##### | 0.015312 | 0.0241  | 0.037    | 83 | 16 | 0.1 |
| pheno. | dirEquivalent | 2 | 5285907  | C | A | -0.019  | 0.005 | 63 | ##### | 0.01317  | 0.00322 | 0.000999 | 83 | 16 | 0.1 |
| pheno. | dirEquivalent | 2 | 585918   | C | T | -0.016  | 0.004 | 63 | ##### | 0.022915 | 0.00322 | 0.006    | 83 | 20 | 0.1 |
| pheno. | dirEquivalent | 2 | 6034545  | C | T | -0.016  | 0.004 | 63 | ##### | 0.022915 | 0.00322 | 0.006    | 83 | 20 | 0.1 |
| pheno. | dirEquivalent | 2 | 7047529  | G | T | -0.016  | 0.004 | 63 | ##### | 0.022915 | 0.00322 | 0.006    | 83 | 20 | 0.1 |
| pheno. | dirEquivalent | 2 | 7186220  | C | T | -0.016  | 0.004 | 63 | ##### | 0.022915 | 0.00322 | 0.006    | 83 | 20 | 0.1 |
| pheno. | GR_rootLengt  | 3 | 11259214 | A | T | -12.100 | 3.164 | 63 | ##### | 0.014966 | 0.00373 | 0.003    | 93 | 9  | 0.0 |
| pheno. | GR_shootArea  | 3 | 11259214 | A | T | #####   | ##### | 63 | ##### | 0.018191 | 0.00049 | 0.000999 | 93 | 9  | 0.0 |
| pheno. | GR_rootLengt  | 3 | 15050751 | G | A | -12.100 | 3.164 | 63 | ##### | 0.014966 | 0.00373 | 0.003    | 91 | 11 | 0.1 |
| pheno. | GR_shootArea  | 3 | 15050751 | G | A | #####   | ##### | 63 | ##### | 0.018191 | 0.00049 | 0.000999 | 91 | 11 | 0.1 |
| pheno. | dirEquivalent | 3 | 17164638 | C | A | -0.014  | 0.004 | 63 | ##### | 0.040944 | 0.00518 | 0.018    | 81 | 19 | 0.1 |
| pheno. | dirEquivalent | 3 | 2500258  | C | A | -0.016  | 0.004 | 63 | ##### | 0.022915 | 0.00322 | 0.006    | 83 | 20 | 0.1 |
| pheno. | dirEquivalent | 3 | 3154804  | C | T | -0.016  | 0.004 | 63 | ##### | 0.022915 | 0.00322 | 0.006    | 83 | 20 | 0.1 |
| pheno. | dirEquivalent | 3 | 3629794  | C | T | -0.016  | 0.004 | 63 | ##### | 0.022915 | 0.00322 | 0.006    | 83 | 20 | 0.1 |
| pheno. | dirEquivalent | 3 | 4269626  | G | T | -0.016  | 0.004 | 63 | ##### | 0.022915 | 0.00322 | 0.006    | 83 | 20 | 0.1 |
| pheno. | GR_shootArea  | 3 | 8873116  | C | T | #####   | ##### | 63 | ##### | 0.018191 | 0.00049 | 0.000999 | 93 | 10 | 0.0 |
| pheno. | GR_rootLengt  | 3 | 8873116  | C | T | -12.100 | 3.164 | 63 | ##### | 0.014966 | 0.00373 | 0.003    | 93 | 10 | 0.0 |
| pheno. | dirEquivalent | 4 | 11948961 | T | A | -0.014  | 0.004 | 63 | ##### | 0.038281 | 0.00518 | 0.016    | 81 | 20 | 0.1 |
| pheno. | dirEquivalent | 4 | 12365323 | C | T | -0.014  | 0.004 | 63 | ##### | 0.038281 | 0.00518 | 0.016    | 82 | 21 | 0.2 |
| pheno. | dirEquivalent | 4 | 15646341 | C | A | -0.014  | 0.004 | 63 | ##### | 0.038281 | 0.00518 | 0.016    | 81 | 21 | 0.2 |
| pheno. | dirEquivalent | 4 | 15845001 | A | T | -0.014  | 0.004 | 63 | ##### | 0.038281 | 0.00518 | 0.016    | 83 | 20 | 0.1 |
| pheno. | dirEquivalent | 4 | 18249171 | T | A | -0.014  | 0.004 | 63 | ##### | 0.038281 | 0.00518 | 0.016    | 53 | 20 | 0.1 |
| pheno. | dirEquivalent | 4 | 3355152  | C | G | -0.014  | 0.004 | 63 | ##### | 0.038281 | 0.00518 | 0.016    | 82 | 21 | 0.2 |
| pheno. | dirEquivalent | 4 | 3355946  | G | C | -0.014  | 0.004 | 63 | ##### | 0.038281 | 0.00518 | 0.016    | 82 | 21 | 0.2 |
| pheno. | dirEquivalent | 4 | 4228138  | A | G | -0.014  | 0.004 | 63 | ##### | 0.038281 | 0.00518 | 0.016    | 82 | 20 | 0.1 |
| pheno. | dirEquivalent | 4 | 9046942  | G | C | -0.014  | 0.004 | 63 | ##### | 0.038281 | 0.00518 | 0.016    | 82 | 21 | 0.2 |
| pheno. | dirEquivalent | 5 | 11090365 | T | A | -0.014  | 0.004 | 63 | ##### | 0.040944 | 0.00518 | 0.018    | 83 | 19 | 0.1 |
| pheno. | dirEquivalent | 5 | 12312975 | C | G | -0.014  | 0.004 | 63 | ##### | 0.040944 | 0.00518 | 0.018    | 84 | 19 | 0.1 |
| pheno. | dirEquivalent | 5 | 12358159 | C | T | -0.014  | 0.004 | 63 | ##### | 0.040944 | 0.00518 | 0.018    | 83 | 19 | 0.1 |
| pheno. | dirEquivalent | 5 | 12409027 | G | A | -0.014  | 0.004 | 63 | ##### | 0.040944 | 0.00518 | 0.018    | 84 | 19 | 0.1 |
| pheno. | GR_rootLengt  | 5 | 16024197 | A | T | -12.100 | 3.164 | 63 | ##### | 0.014966 | 0.00373 | 0.003    | 92 | 10 | 0.0 |

|         |                 |   |          |   |   |         |       |     |       |          |         |          |    |    |     |
|---------|-----------------|---|----------|---|---|---------|-------|-----|-------|----------|---------|----------|----|----|-----|
| pheno.  | GR_shootArea    | 5 | 16024197 | A | T | #####   | ##### | 63  | ##### | 0.018191 | 0.00049 | 0.000999 | 92 | 10 | 0.  |
| pheno.  | GR_shootArea    | 5 | 16109431 | G | A | #####   | ##### | 63  | ##### | 0.018191 | 0.00049 | 0.000999 | 10 | 64 | 0.8 |
| pheno.  | GR_rootLengt    | 5 | 16109431 | G | A | -12.100 | 3.164 | 63  | ##### | 0.014966 | 0.00373 | 0.003    | 10 | 64 | 0.8 |
| pheno.  | dirEquivalent   | 5 | 19099082 | G | C | -0.014  | 0.004 | 63  | ##### | 0.040944 | 0.00518 | 0.018    | 83 | 19 | 0.1 |
| pheno.  | GR_rootLengt    | 5 | 20388107 | A | T | -10.700 | 3.164 | 63  | ##### | 0.030731 | 0.01703 | 0.017    | 82 | 9  | 0.0 |
| pheno.  | dirEquivalent   | 5 | 4797923  | A | T | -0.014  | 0.004 | 63  | ##### | 0.040944 | 0.00518 | 0.018    | 82 | 19 | 0.1 |
| pheno.  | dirEquivalent   | 5 | 4797976  | G | A | -0.014  | 0.004 | 63  | ##### | 0.040944 | 0.00518 | 0.018    | 55 | 19 | 0.2 |
| pheno.  | dirEquivalent   | 5 | 4798526  | A | G | -0.014  | 0.004 | 63  | ##### | 0.040944 | 0.00518 | 0.018    | 37 | 19 | 0.3 |
| pheno.  | gravitropicScor | 5 | 6508329  | A | G | -0.020  | 0.006 | 63  | ##### | 0.013618 | 0.06509 | 0.008    | 67 | 36 | 0.3 |
| climate | bio18           | 1 | 10187610 | T | C | 6.830   | 1.987 | 99  | ##### | 0.030738 | 0.01236 | 0.047    | 82 | 20 | 0.1 |
| climate | bio18           | 1 | 13904611 | C | T | 6.570   | 1.756 | 90  | ##### | 0.018766 | 0.01236 | 0.016    | 72 | 20 | 0.2 |
| climate | bio18           | 1 | 13994958 | G | A | 6.830   | 1.987 | 99  | ##### | 0.030738 | 0.01236 | 0.047    | 82 | 20 | 0.1 |
| climate | bio18           | 1 | 17408807 | C | T | 6.830   | 1.987 | 99  | ##### | 0.030738 | 0.01236 | 0.047    | 82 | 20 | 0.1 |
| climate | bio18           | 1 | 23648407 | A | C | 6.830   | 1.987 | 99  | ##### | 0.030738 | 0.01236 | 0.047    | 82 | 20 | 0.1 |
| climate | bio16           | 1 | 29696198 | G | A | 5.250   | 1.377 | 94  | ##### | 0.004745 | 0.0632  | 0.016    | 70 | 27 | 0.2 |
| climate | bio18           | 1 | 29696198 | G | A | 6.340   | 1.569 | 94  | ##### | 0.011173 | 0.01236 | 0.004    | 70 | 27 | 0.2 |
| climate | bio13           | 2 | 14417366 | A | G | 3.990   | 0.959 | 64  | ##### | 0.000481 | 0.01466 | 0.004    | 60 | 5  | 0.0 |
| climate | bio8            | 3 | 11873293 | A | G | 37.800  | 8.736 | 65  | ##### | 0.000113 | 0.00694 | 0.006    | 4  | 62 | 0.9 |
| climate | bio18           | 4 | 12365323 | C | T | 6.850   | 1.944 | 100 | ##### | 0.026847 | 0.01236 | 0.035    | 82 | 21 | 0.2 |
| climate | bio18           | 4 | 15646341 | C | A | 6.720   | 1.936 | 99  | ##### | 0.029136 | 0.01236 | 0.042    | 81 | 21 | 0.2 |
| climate | bio11           | 4 | 1732480  | T | A | -5.550  | 1.564 | 79  | ##### | 0.019162 | 0.01951 | 0.045    | 75 | 5  | 0.0 |
| climate | bio4            | 4 | 1732480  | T | A | 224.000 | ##### | 79  | ##### | 0.024548 | 0.01283 | 0.044    | 75 | 5  | 0.0 |
| climate | bio18           | 4 | 18249171 | T | A | 6.910   | 2.005 | 71  | ##### | 0.030265 | 0.01236 | 0.047    | 53 | 20 | 0.  |
| climate | bio18           | 4 | 279210   | T | G | 6.830   | 1.987 | 99  | ##### | 0.030738 | 0.01236 | 0.047    | 82 | 20 | 0.1 |
| climate | bio18           | 4 | 3355152  | C | G | 6.850   | 1.944 | 100 | ##### | 0.026847 | 0.01236 | 0.035    | 82 | 21 | 0.2 |
| climate | bio18           | 4 | 3355946  | G | C | 6.850   | 1.944 | 100 | ##### | 0.026847 | 0.01236 | 0.035    | 82 | 21 | 0.2 |
| climate | bio18           | 4 | 4228138  | A | G | 6.830   | 1.987 | 99  | ##### | 0.030738 | 0.01236 | 0.047    | 82 | 20 | 0.1 |
| climate | bio18           | 4 | 9046942  | G | C | 6.850   | 1.944 | 100 | ##### | 0.026847 | 0.01236 | 0.035    | 82 | 21 | 0.2 |
| climate | bio18           | 5 | 4245213  | A | T | 6.830   | 1.987 | 99  | ##### | 0.030738 | 0.01236 | 0.047    | 82 | 20 | 0.1 |
| climate | bio18           | 5 | 4500202  | G | A | 6.830   | 1.987 | 99  | ##### | 0.030738 | 0.01236 | 0.047    | 82 | 20 | 0.1 |

Table S6 (cont'd)

| Longitude   | Latitude     | Substitution type | AA change | Gene      | Biochemical effect (Grantham score) | Significant under permutation | Significant under permutation & Bonferroni trait correction | Significant under Bonferroni traits & SNPs correction |
|-------------|--------------|-------------------|-----------|-----------|-------------------------------------|-------------------------------|-------------------------------------------------------------|-------------------------------------------------------|
| 40.87013144 | -81.29801711 | interg.           |           |           |                                     | ✓                             | ✓                                                           | ✓                                                     |
| 40.87013144 | -81.29801711 | interg.           |           |           |                                     | ✓                             | ✓                                                           | ✓                                                     |
| 40.861787   | -82.91865044 | interg.           |           |           |                                     | ✓                             | ✓                                                           | ✓                                                     |
| 40.861787   | -82.91865044 | interg.           |           |           |                                     | ✓                             | ✓                                                           | ✓                                                     |
| 41.66797605 | -85.25108189 | interg.           |           |           |                                     | ✓                             |                                                             |                                                       |
| 40.861787   | -82.91865044 | intron            |           | AT1G54440 |                                     | ✓                             | ✓                                                           | ✓                                                     |
| 40.861787   | -82.91865044 | intron            |           | AT1G54440 |                                     | ✓                             | ✓                                                           | ✓                                                     |
| 41.66797605 | -85.25108189 | interg.           |           |           |                                     | ✓                             |                                                             |                                                       |
| 41.46632759 | -84.86486874 | interg.           |           |           |                                     | ✓                             |                                                             |                                                       |
| 40.861787   | -82.91865044 | interg.           |           |           |                                     | ✓                             | ✓                                                           | ✓                                                     |
| 40.861787   | -82.91865044 | interg.           |           |           |                                     | ✓                             | ✓                                                           | ✓                                                     |
| 40.861787   | -82.91865044 | interg.           |           |           |                                     | ✓                             | ✓                                                           | ✓                                                     |
| 40.861787   | -82.91865044 | interg.           |           |           |                                     | ✓                             | ✓                                                           | ✓                                                     |
| 41.66797605 | -85.25108189 | nonsyn A->P       | AT1G0381( | 27        |                                     | ✓                             |                                                             |                                                       |
| 40.86663538 | -82.27759425 | interg.           |           |           |                                     | ✓                             |                                                             |                                                       |
| 41.67782725 | -85.3208278  | interg.           |           |           |                                     | ✓                             |                                                             | ✓                                                     |
| 41.67782725 | -85.3208278  | intron            |           | AT2G24680 |                                     | ✓                             |                                                             | ✓                                                     |
| 41.67782725 | -85.3208278  | interg.           |           |           |                                     | ✓                             |                                                             | ✓                                                     |
| 41.66797605 | -85.25108189 | interg.           |           |           |                                     | ✓                             |                                                             |                                                       |
| 41.66797605 | -85.25108189 | intron            |           | AT2G28900 |                                     | ✓                             |                                                             |                                                       |
| 41.67869644 | -84.57000741 | interg.           |           |           |                                     | ✓                             |                                                             |                                                       |
| 41.67869644 | -84.57000741 | interg.           |           |           |                                     | ✓                             |                                                             |                                                       |



|             |              |             |           |    |   |   |   |
|-------------|--------------|-------------|-----------|----|---|---|---|
| 41.66797605 | -85.25108189 | interg.     |           |    | ✓ |   |   |
| 40.861787   | -82.91865044 | 3' UTR      | AT2G38290 |    | ✓ | ✓ | ✓ |
| 40.861787   | -82.91865044 | 3' UTR      | AT2G38290 |    | ✓ | ✓ | ✓ |
| 40.861787   | -82.91865044 | nonsyn A->G | AT2G3891( | 60 | ✓ | ✓ | ✓ |
| 40.861787   | -82.91865044 | nonsyn A->G | AT2G3891( | 60 | ✓ | ✓ | ✓ |
| 41.66797605 | -85.25108189 | nonsyn A->G | AT2G3916( | 60 | ✓ |   |   |
| 41.67782725 | -85.3208278  | interg.     |           |    | ✓ |   | ✓ |
| 41.32965606 | -84.2807173  | interg.     |           |    | ✓ |   |   |
| 41.67782725 | -85.3208278  | syn V->V    | AT2G01820 |    | ✓ |   | ✓ |
| 41.54135281 | -85.0139785  | interg.     |           |    | ✓ | ✓ | ✓ |
| 41.54135281 | -85.0139785  | interg.     |           |    | ✓ | ✓ | ✓ |
| 41.67782725 | -85.3208278  | syn G->G    | AT2G02220 |    | ✓ |   | ✓ |
| 41.67782725 | -85.3208278  | syn S->S    | AT2G14247 |    | ✓ |   | ✓ |
| 41.67782725 | -85.3208278  | nonsyn P->A | AT2G1627( | 27 | ✓ |   | ✓ |
| 41.67782725 | -85.3208278  | intron      | AT2G16580 |    | ✓ |   | ✓ |
| 40.861787   | -82.91865044 | interg.     |           |    | ✓ | ✓ | ✓ |
| 40.861787   | -82.91865044 | interg.     |           |    | ✓ | ✓ | ✓ |
| 40.24117118 | -82.47677464 | interg.     |           |    | ✓ | ✓ | ✓ |
| 40.24117118 | -82.47677464 | interg.     |           |    | ✓ | ✓ | ✓ |
| 41.66797605 | -85.25108189 | interg.     |           |    | ✓ |   |   |
| 41.67782725 | -85.3208278  | syn K->K    | AT3G07830 |    | ✓ |   | ✓ |
| 41.67782725 | -85.3208278  | interg.     |           |    | ✓ |   | ✓ |
| 41.67782725 | -85.3208278  | intron      | AT3G11530 |    | ✓ |   | ✓ |
| 41.67782725 | -85.3208278  | 5' UTR      | AT3G13229 |    | ✓ |   | ✓ |
| 40.8662483  | -81.9417154  | interg.     |           |    | ✓ | ✓ | ✓ |
| 40.8662483  | -81.9417154  | interg.     |           |    | ✓ | ✓ | ✓ |
| 41.68799415 | -85.3222627  | interg.     |           |    | ✓ |   |   |
| 41.67822595 | -85.39370743 | interg.     |           |    | ✓ |   |   |
| 41.67822595 | -85.39370743 | syn E->E    | AT4G32410 |    | ✓ |   |   |
| 41.7692981  | -85.9290451  | 3' UTR      | AT4G32840 |    | ✓ |   |   |
| 41.7692981  | -85.9290451  | interg.     |           |    | ✓ |   |   |
| 41.67822595 | -85.39370743 | interg.     |           |    | ✓ |   |   |
| 41.67822595 | -85.39370743 | interg.     |           |    | ✓ |   |   |
| 41.66888725 | -85.3310928  | TE          | AT4G07440 |    | ✓ |   |   |
| 41.67822595 | -85.39370743 | nonsyn H->Q | AT4G1596( | 24 | ✓ |   |   |
| 41.66797605 | -85.25108189 | TE          | AT5G29037 |    | ✓ |   |   |
| 41.66797605 | -85.25108189 | TE          | AT5G32630 |    | ✓ |   |   |
| 41.66797605 | -85.25108189 | TE          | AT5G32825 |    | ✓ |   |   |
| 41.66797605 | -85.25108189 | interg.     |           |    | ✓ |   |   |
| 40.8662483  | -81.9417154  | intron      | AT5G40020 |    | ✓ | ✓ | ✓ |

|             |              |             |               |   |   |   |
|-------------|--------------|-------------|---------------|---|---|---|
| 40.8662483  | -81.9417154  | intron      | AT5G40020     | ✓ | ✓ | ✓ |
| 42.16498594 | -84.42275313 | interg.     |               | ✓ | ✓ | ✓ |
| 42.16498594 | -84.42275313 | interg.     |               | ✓ | ✓ | ✓ |
| 41.66797605 | -85.25108189 | interg.     |               | ✓ |   |   |
| 41.03714444 | -86.63891111 | interg.     |               | ✓ |   |   |
| 41.66797605 | -85.25108189 | TE          | AT5G14830     | ✓ |   |   |
| 41.66797605 | -85.25108189 | TE          | AT5G14830     | ✓ |   |   |
| 41.66797605 | -85.25108189 | interg.     |               | ✓ |   |   |
| 41.97279292 | -85.01427656 | nonsyn C->W | AT5G1933( 215 | ✓ |   |   |
| 41.66888725 | -85.3310928  | interg.     |               | ✓ |   |   |
| 41.66888725 | -85.3310928  | interg.     |               | ✓ |   |   |
| 41.66888725 | -85.3310928  | TE          | AT1G36933     | ✓ |   |   |
| 41.66888725 | -85.3310928  | interg.     |               | ✓ |   |   |
| 41.66888725 | -85.3310928  | nonsyn Y->S | AT1G6374( 144 | ✓ |   |   |
| 41.46632759 | -84.86486874 | interg.     |               | ✓ |   |   |
| 41.46632759 | -84.86486874 | interg.     |               | ✓ |   |   |
| 39.478949   | -77.9063534  | interg.     |               | ✓ |   |   |
| 41.79308313 | -83.68315273 | TE          | AT3G30219     | ✓ |   |   |
| 41.67822595 | -85.39370743 | interg.     |               | ✓ |   |   |
| 41.67822595 | -85.39370743 | syn E->E    | AT4G32410     | ✓ |   |   |
| 41.04504    | -87.5046     | interg.     |               | ✓ |   |   |
| 41.04504    | -87.5046     | interg.     |               | ✓ |   |   |
| 41.7692981  | -85.9290451  | interg.     |               | ✓ |   |   |
| 41.66888725 | -85.3310928  | interg.     |               | ✓ |   |   |
| 41.67822595 | -85.39370743 | interg.     |               | ✓ |   |   |
| 41.67822595 | -85.39370743 | interg.     |               | ✓ |   |   |
| 41.66888725 | -85.3310928  | TE          | AT4G07440     | ✓ |   |   |
| 41.67822595 | -85.39370743 | nonsyn H->Q | AT4G1596( 24  | ✓ |   |   |
| 41.66888725 | -85.3310928  | syn I->I    | AT5G13260     | ✓ |   |   |
| 41.66888725 | -85.3310928  | nonsyn A->G | AT5G1395( 60  | ✓ |   |   |

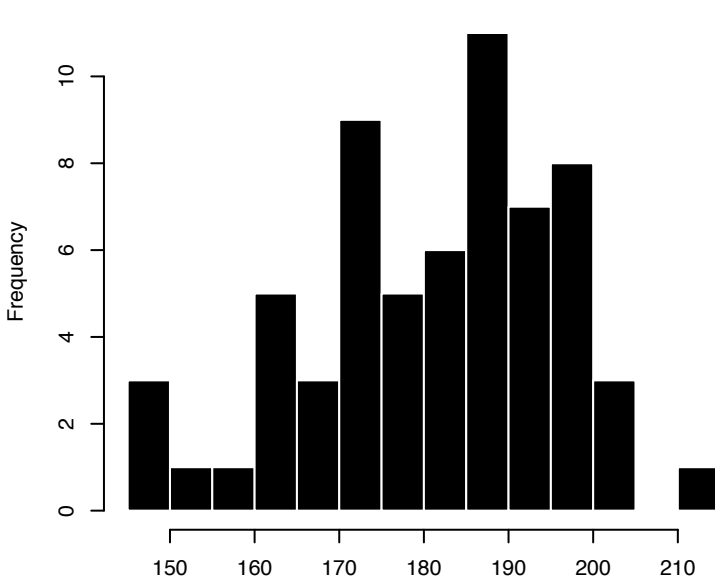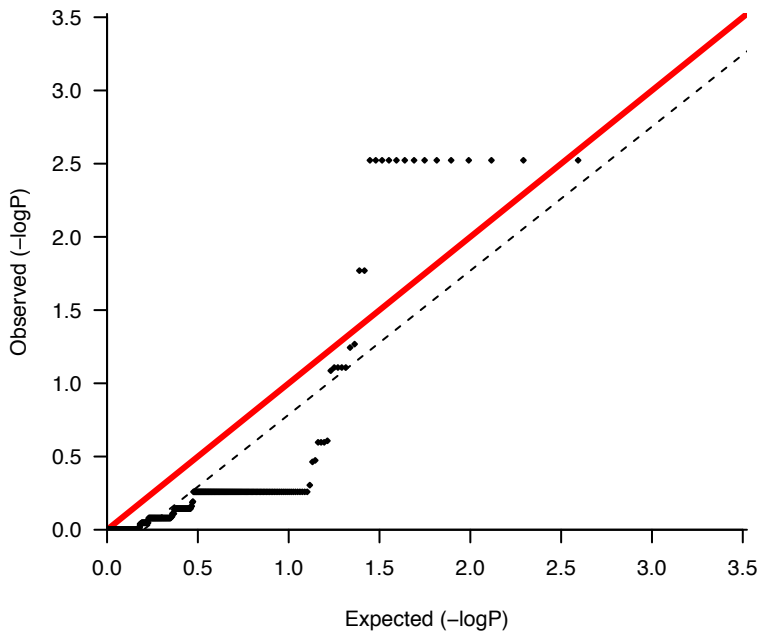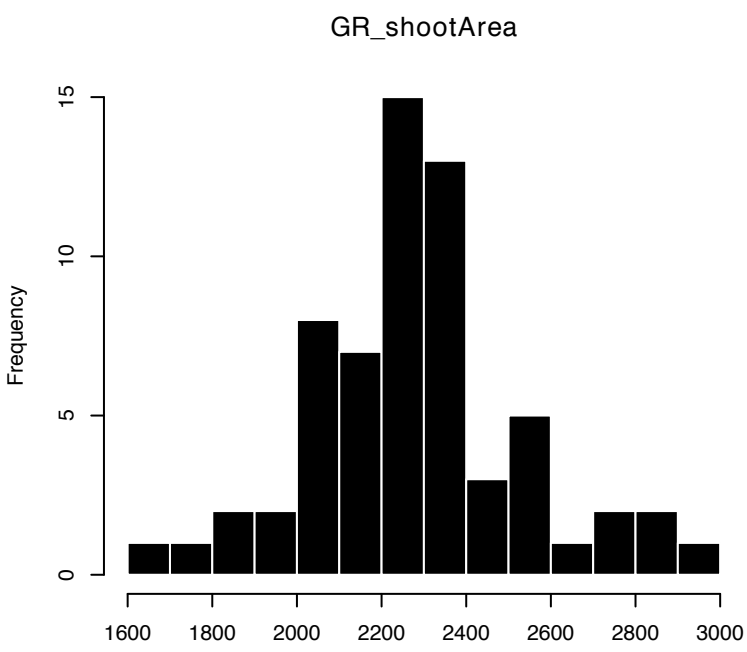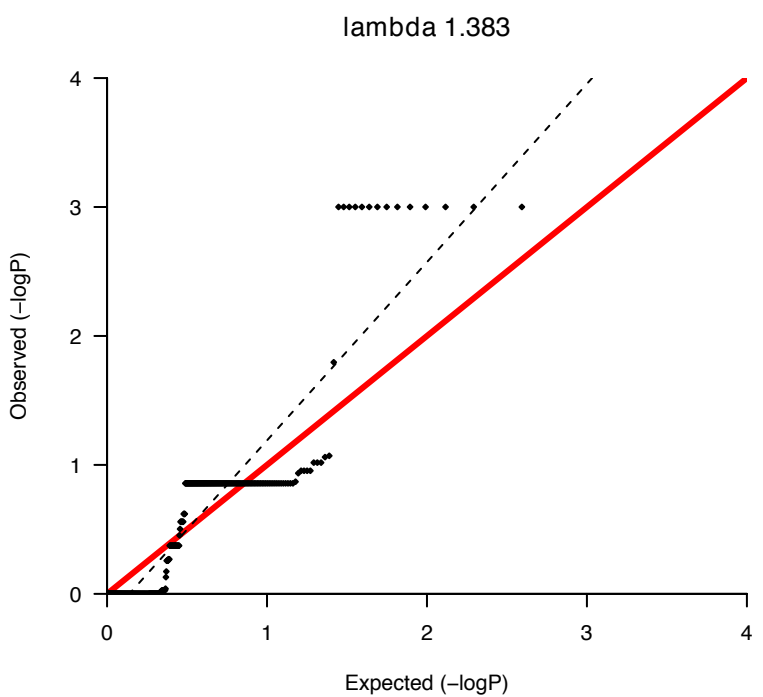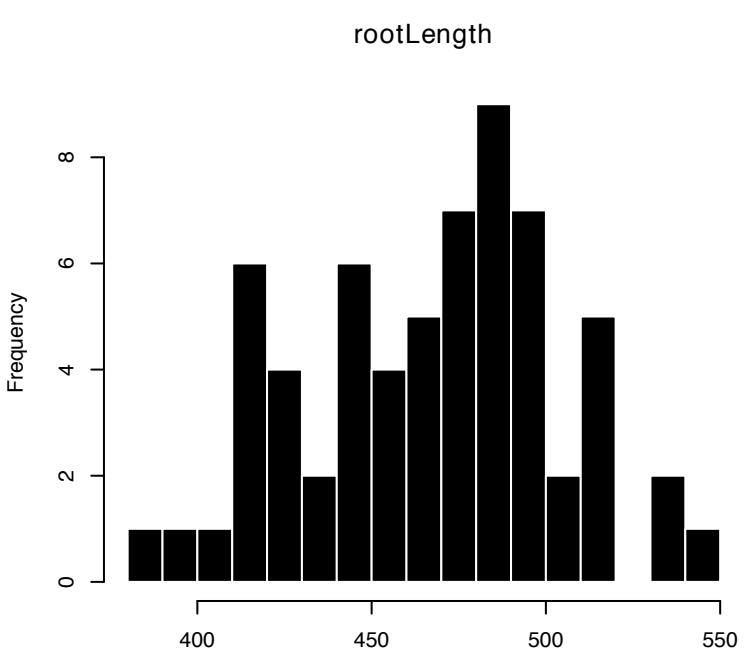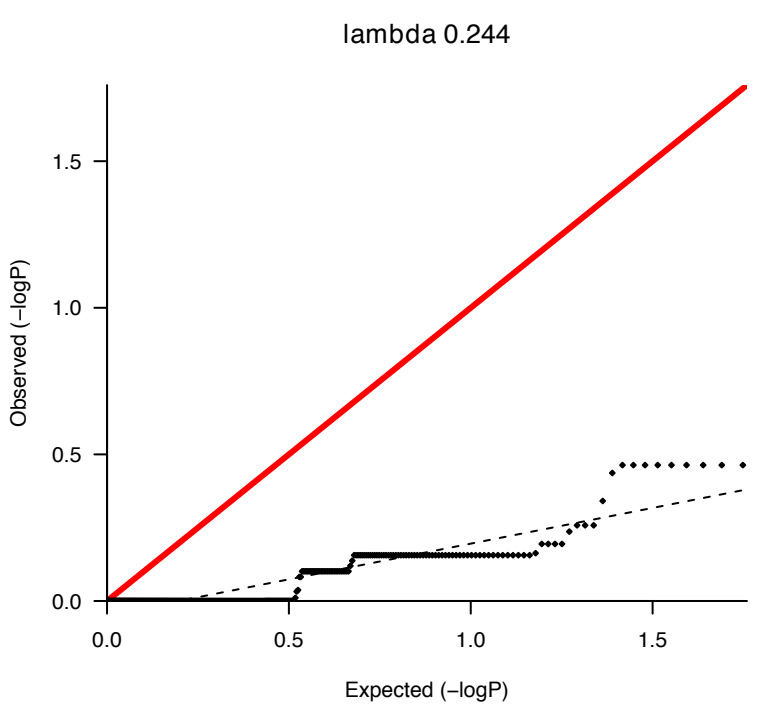

lambda 1.383

lambda 0.244

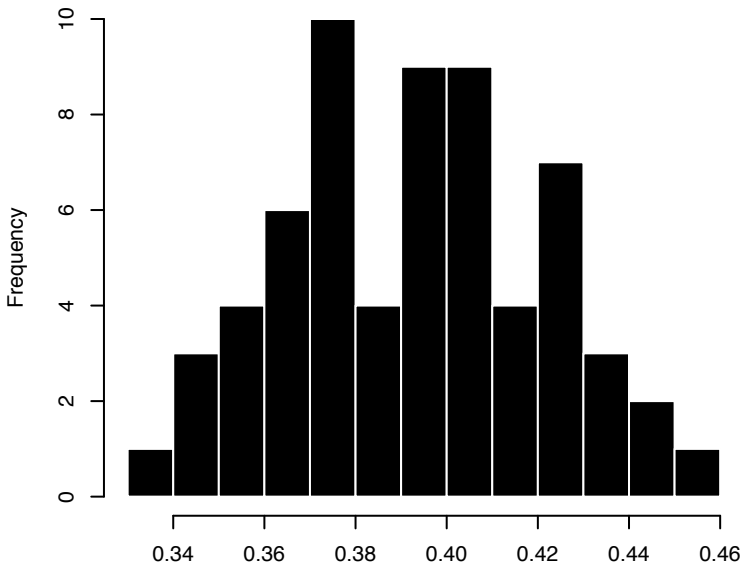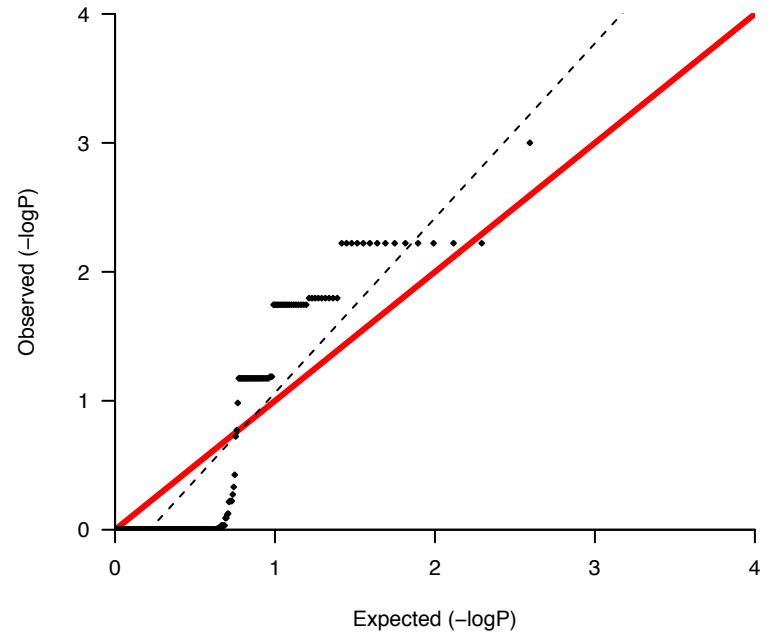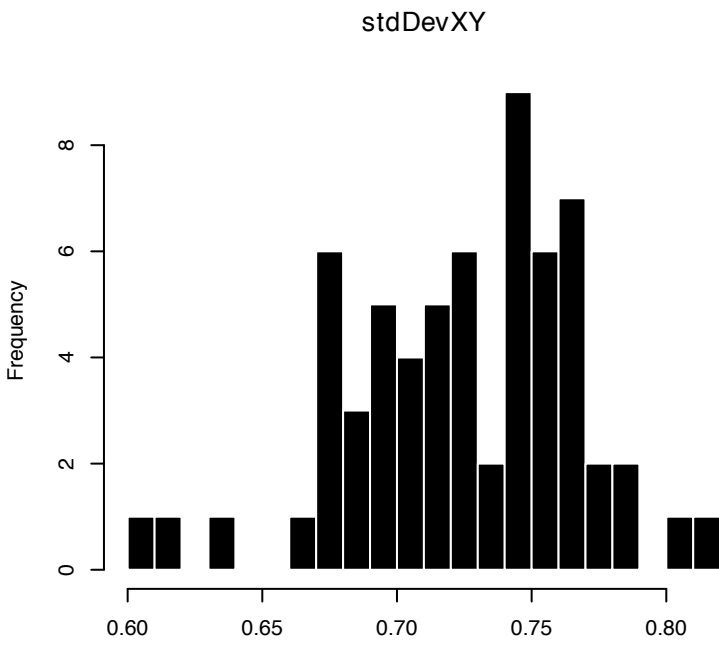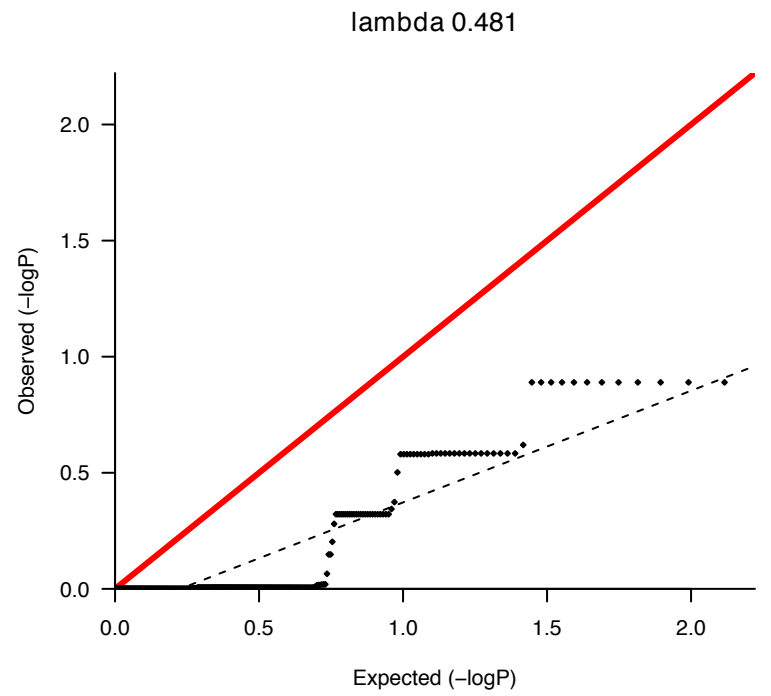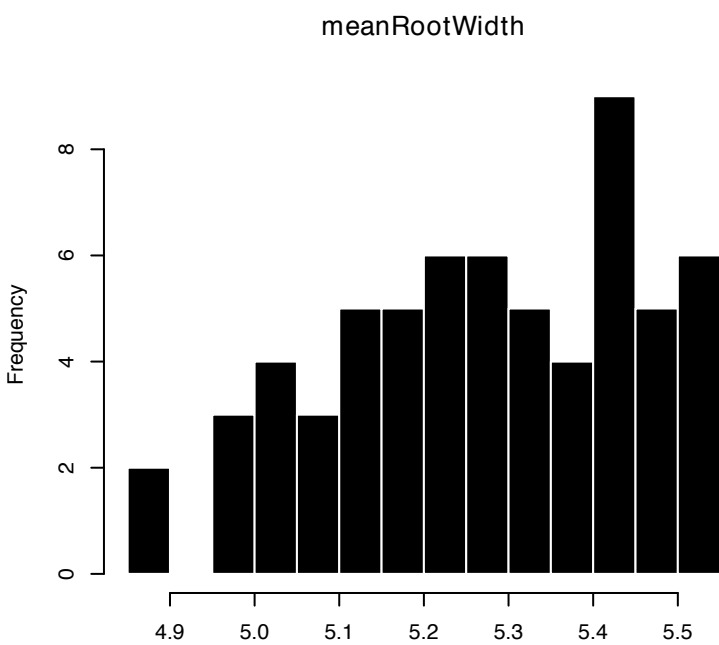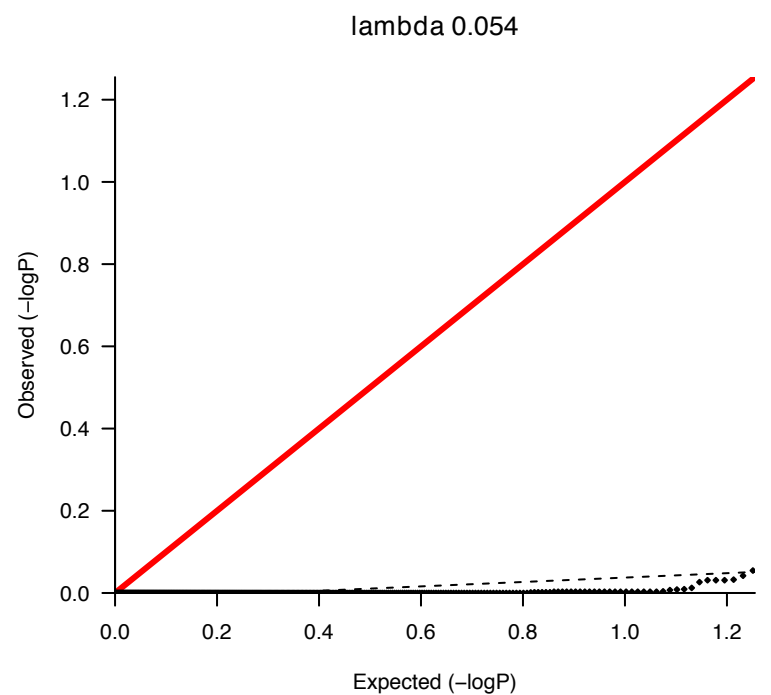

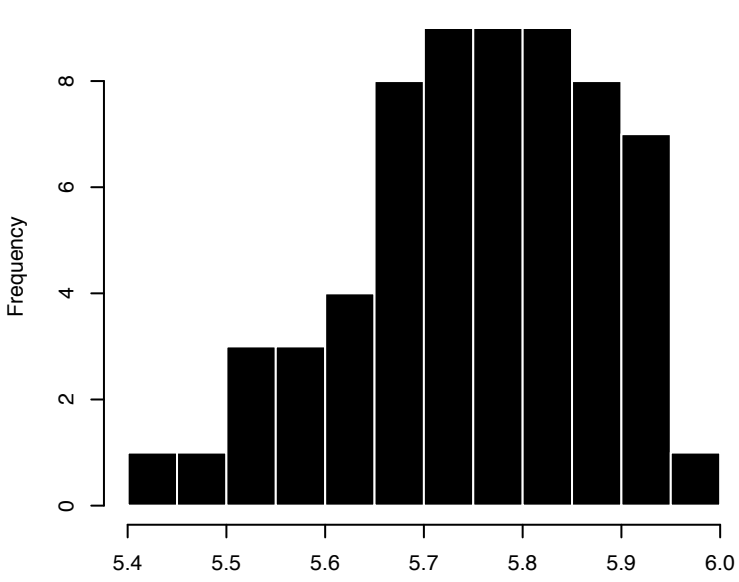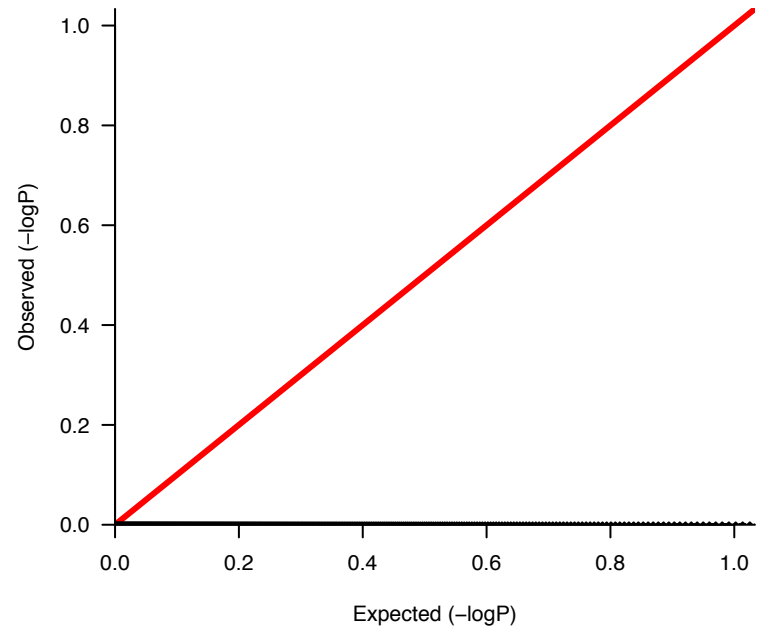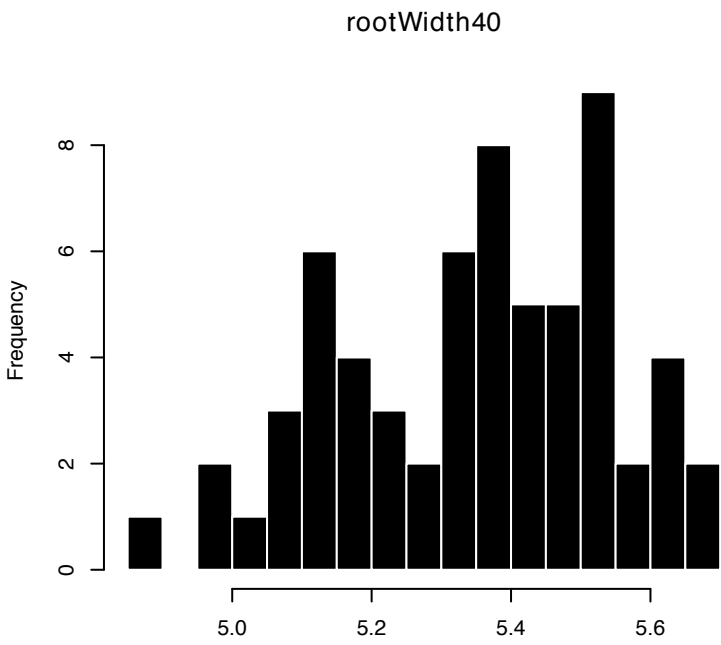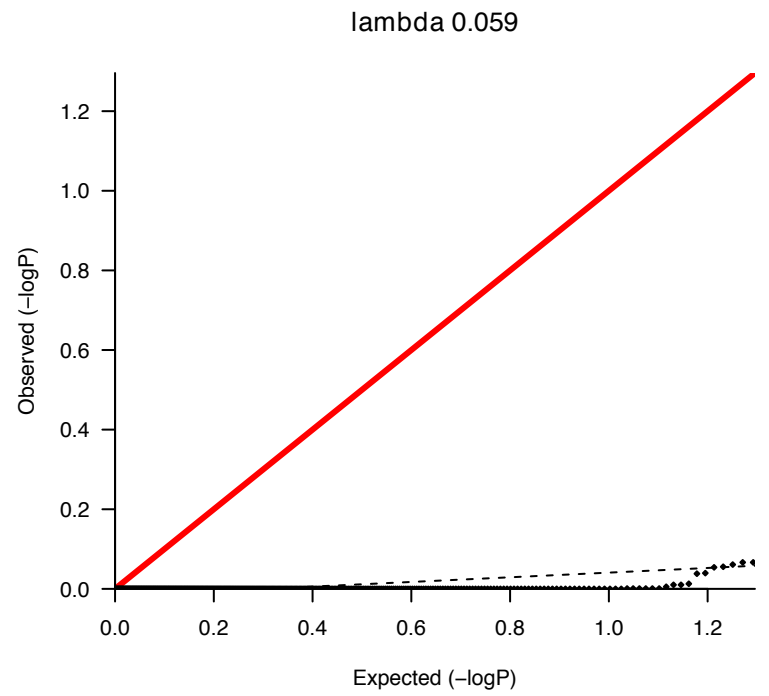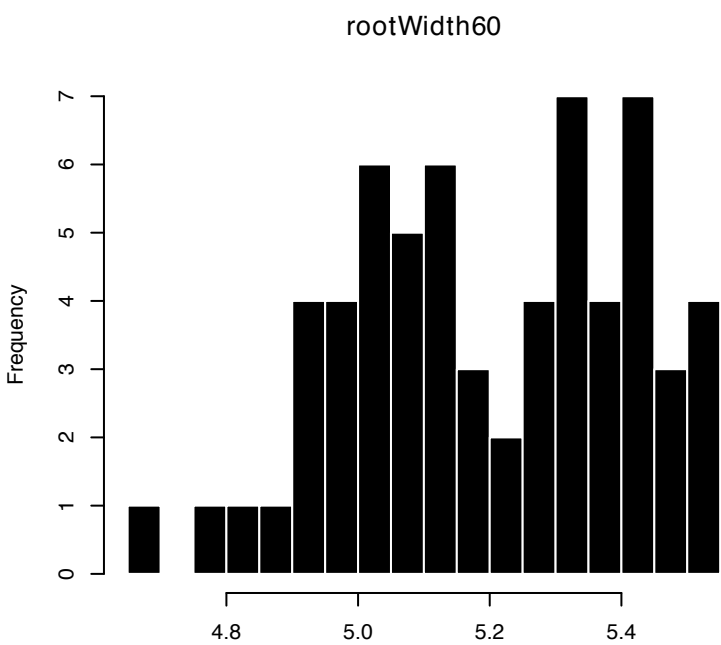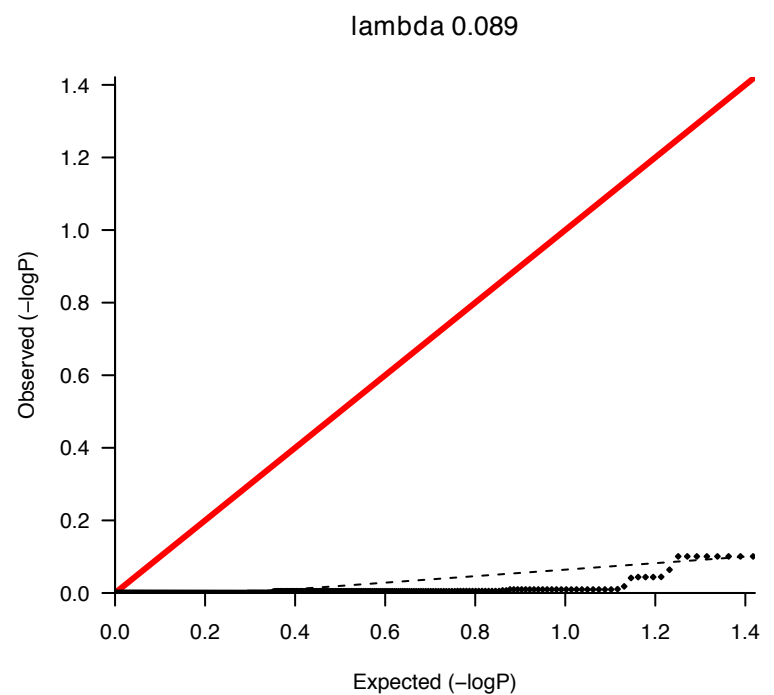

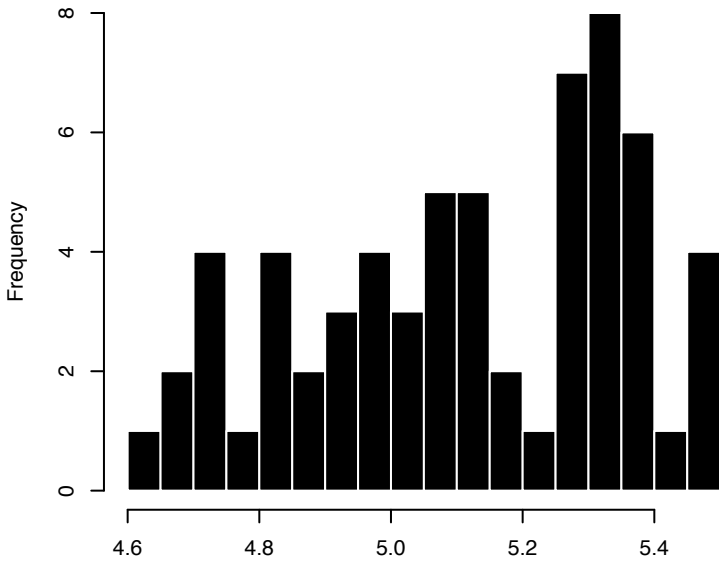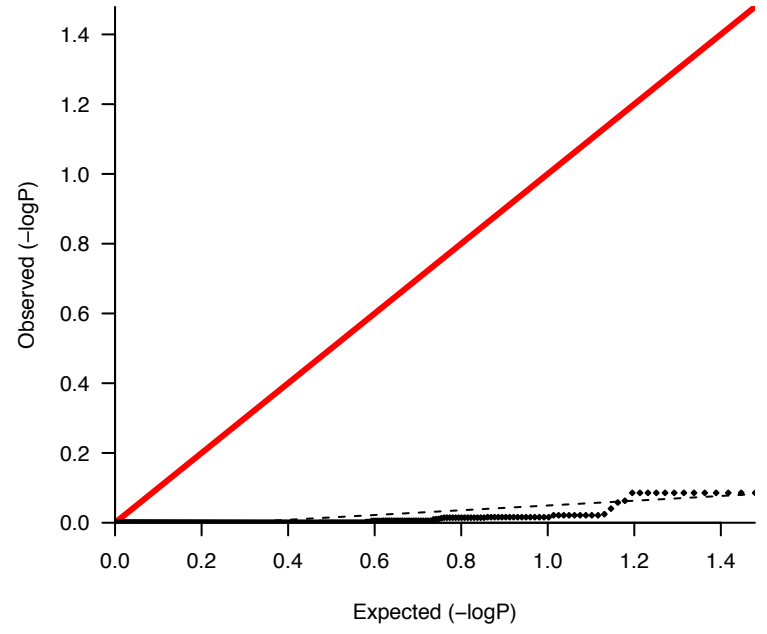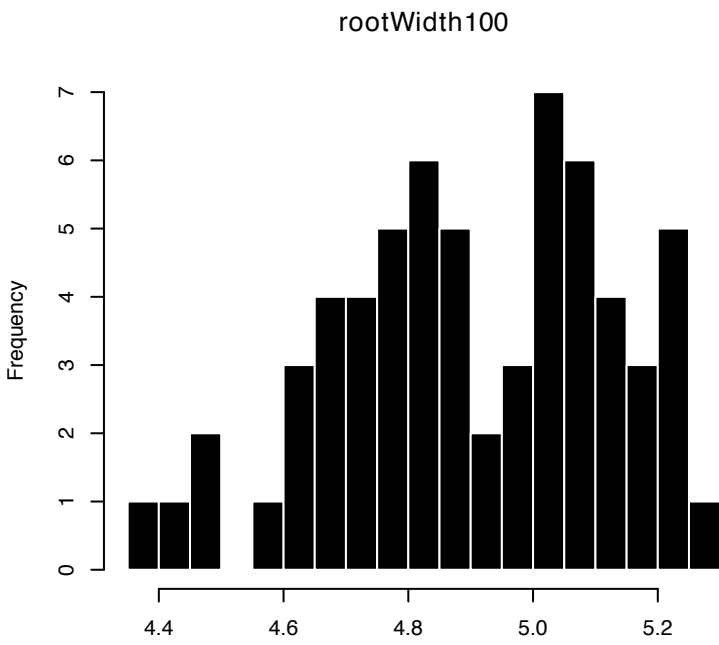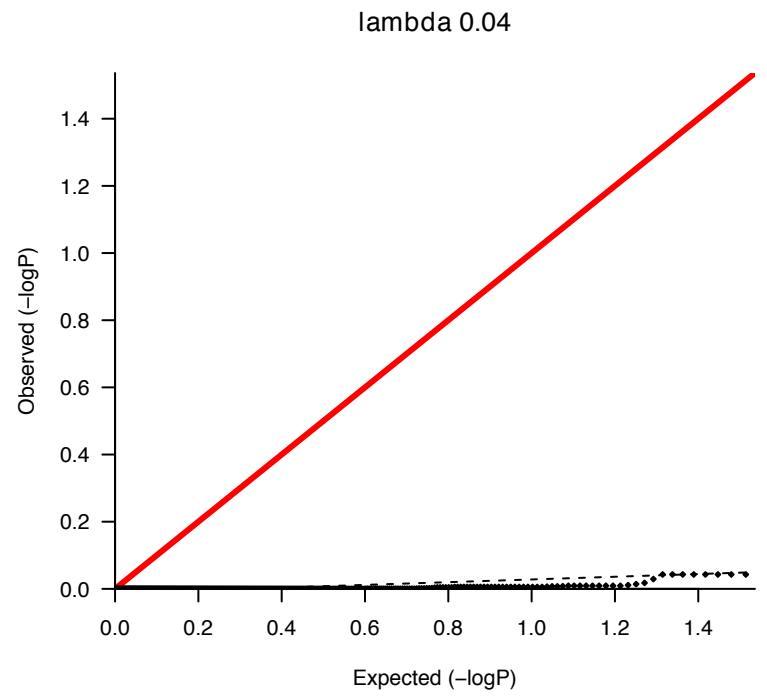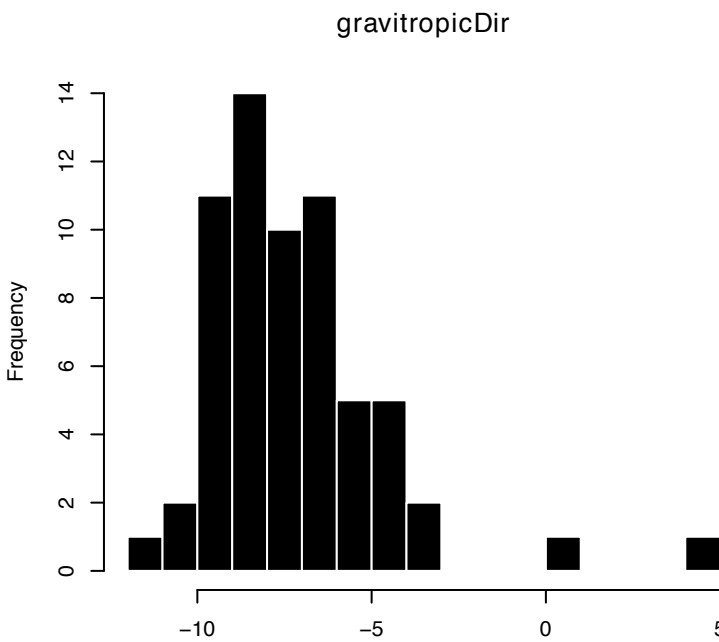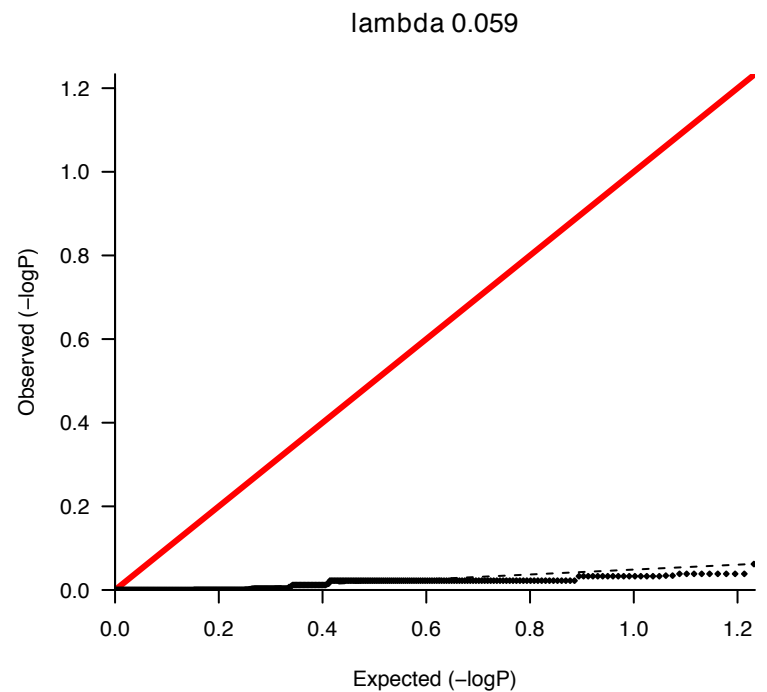

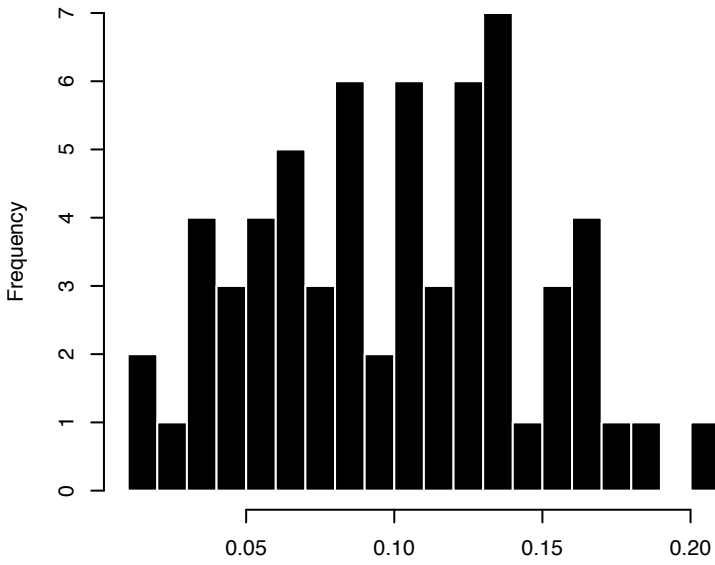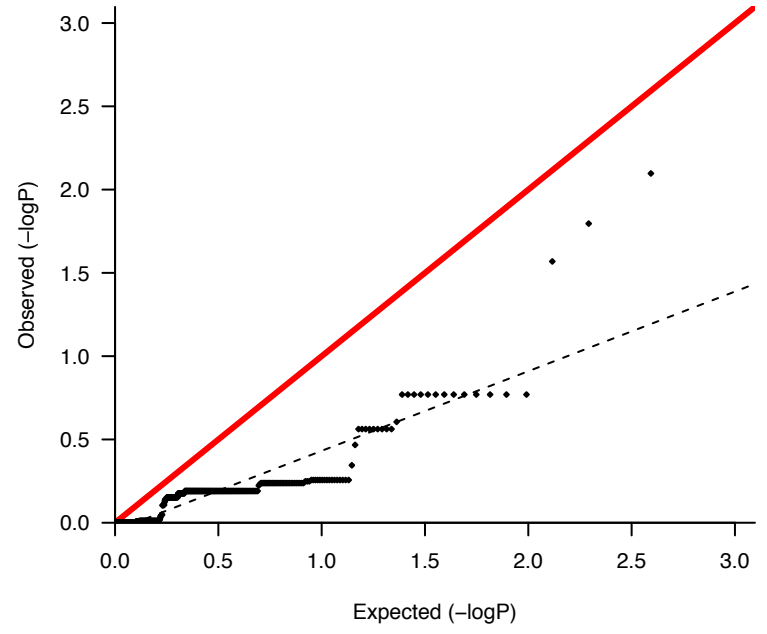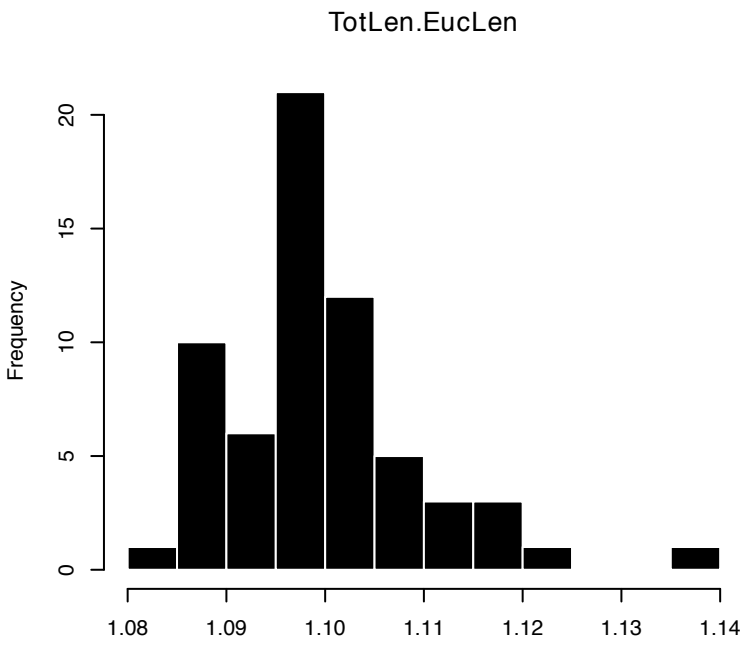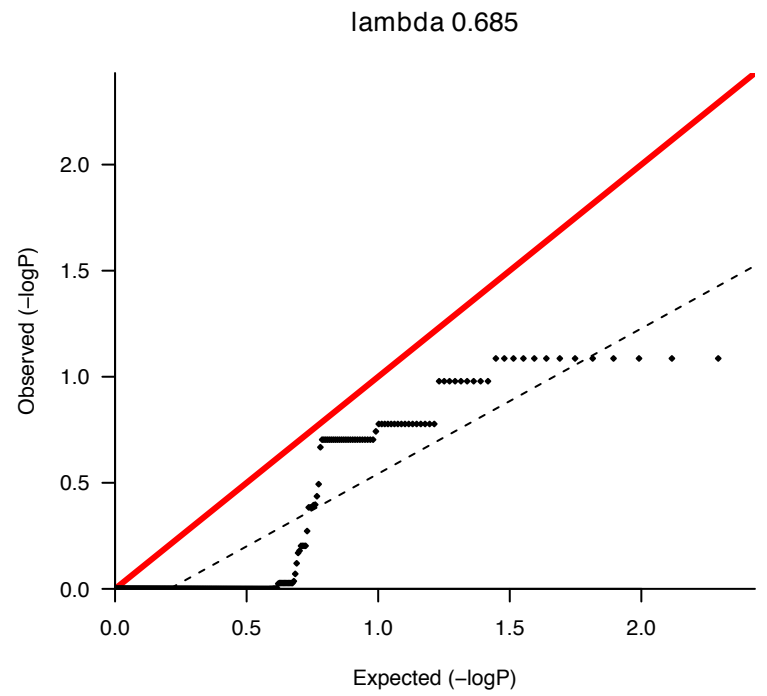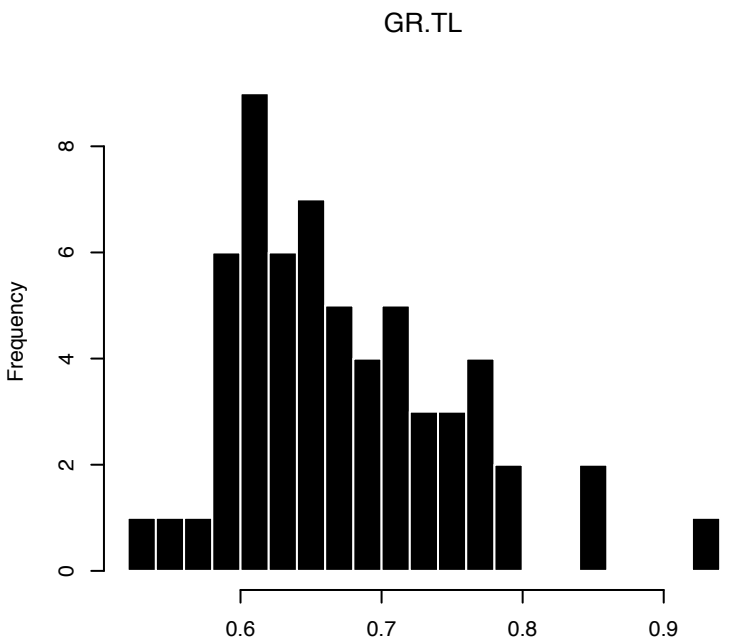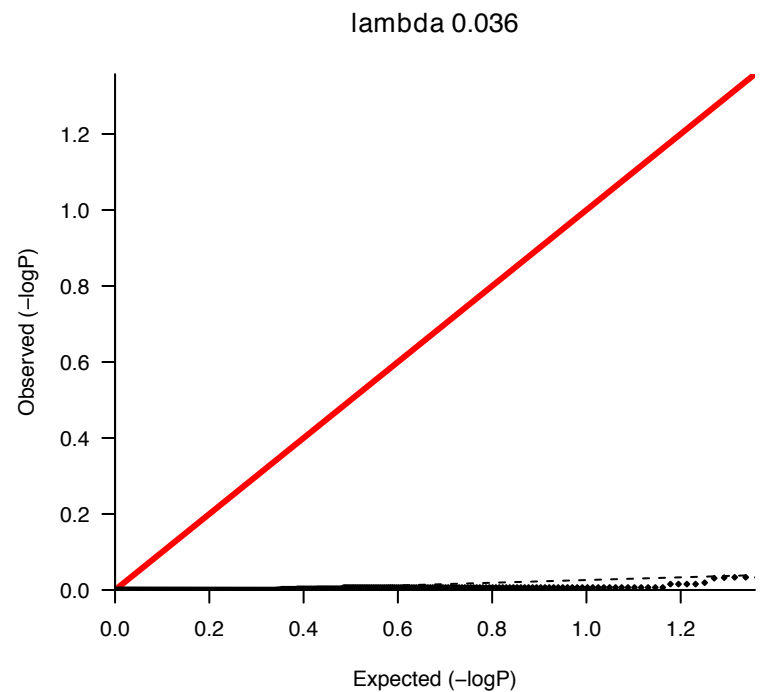

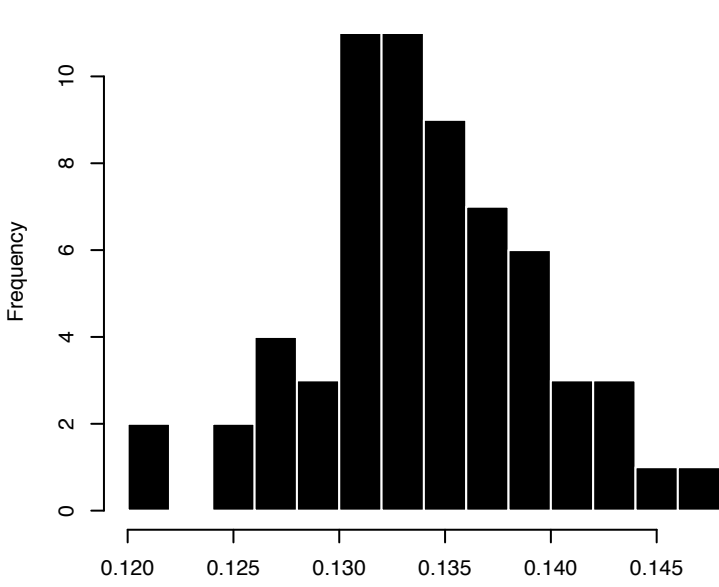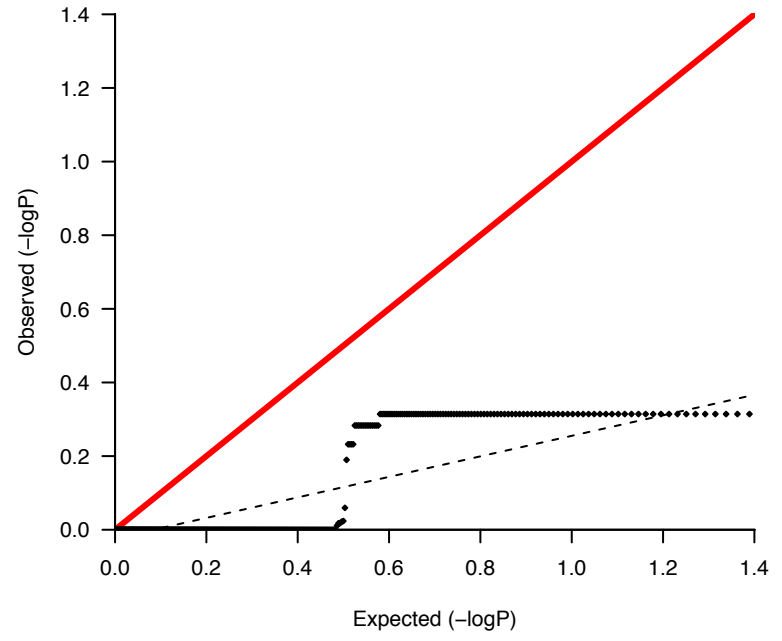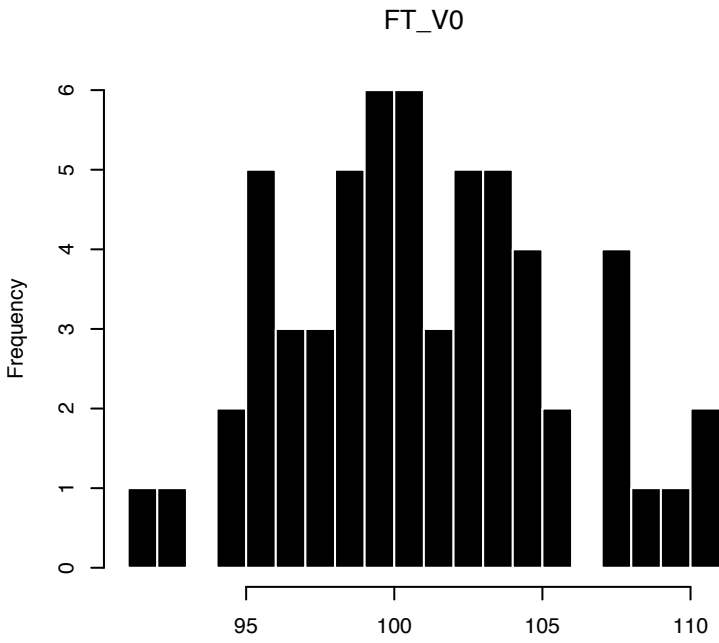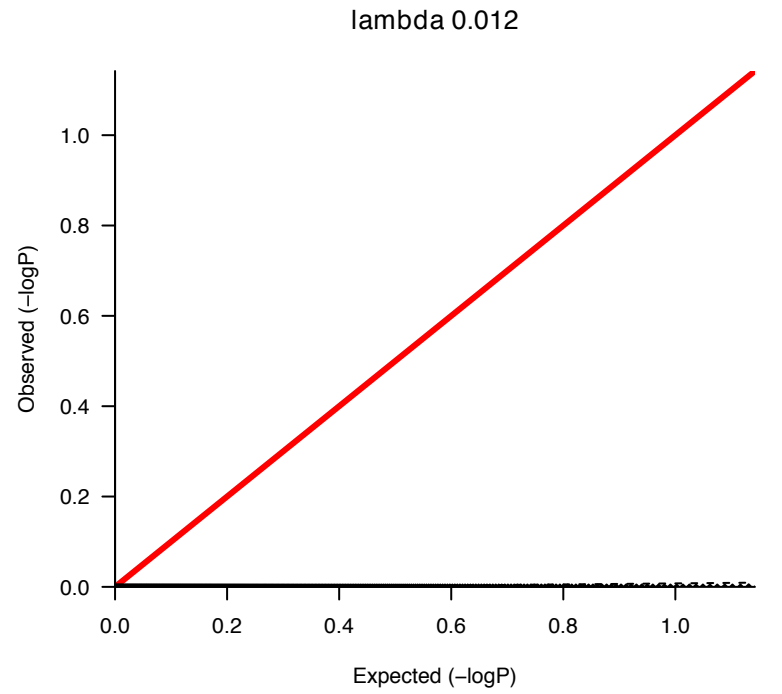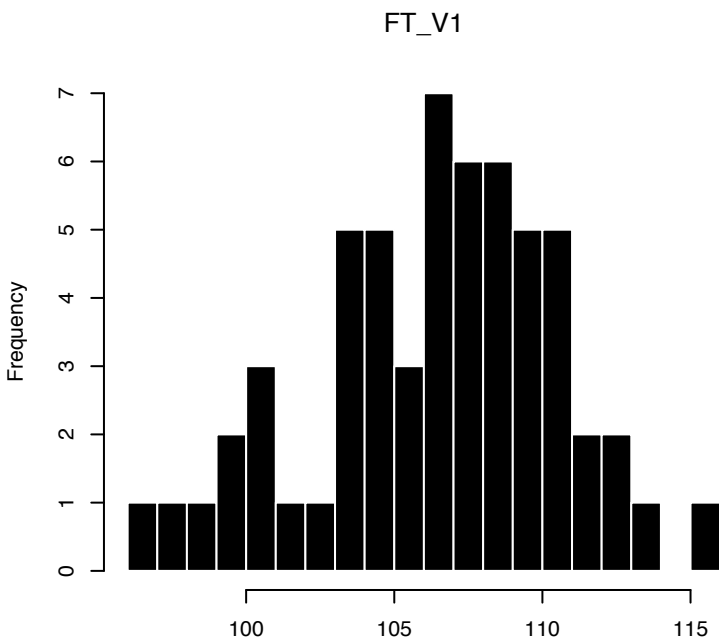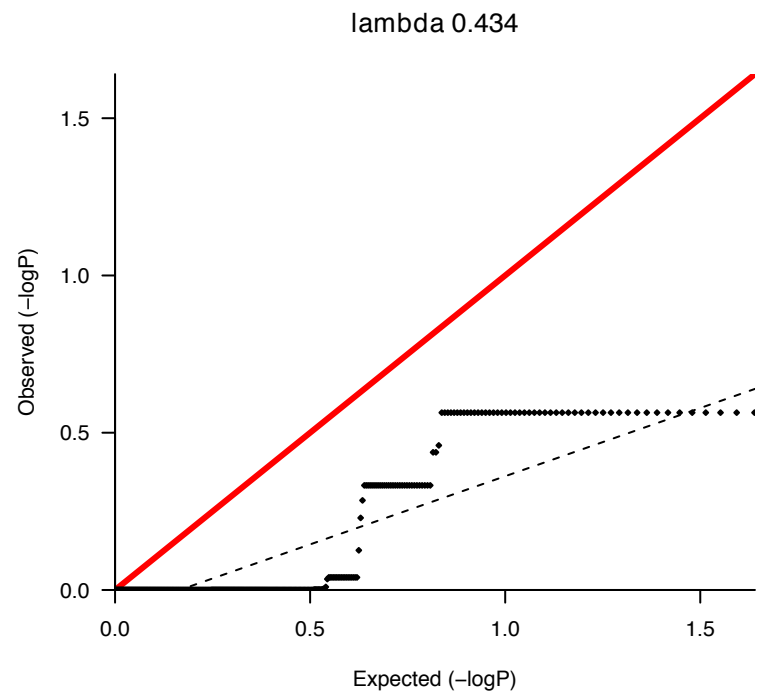



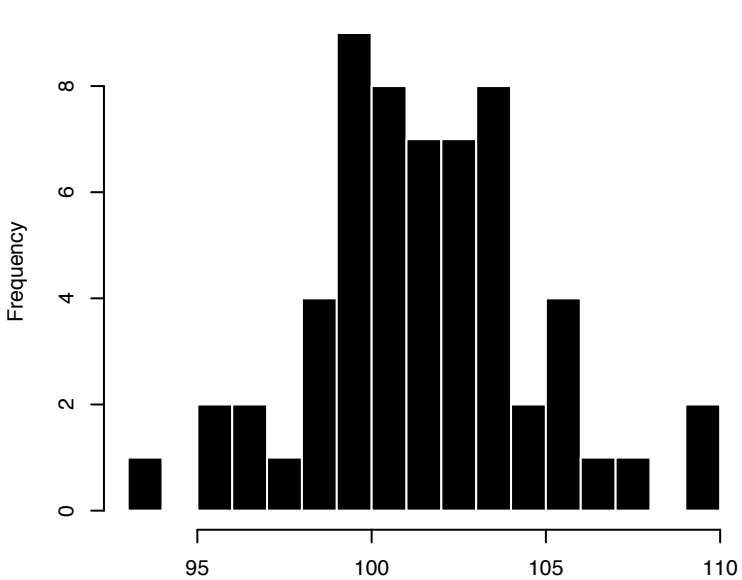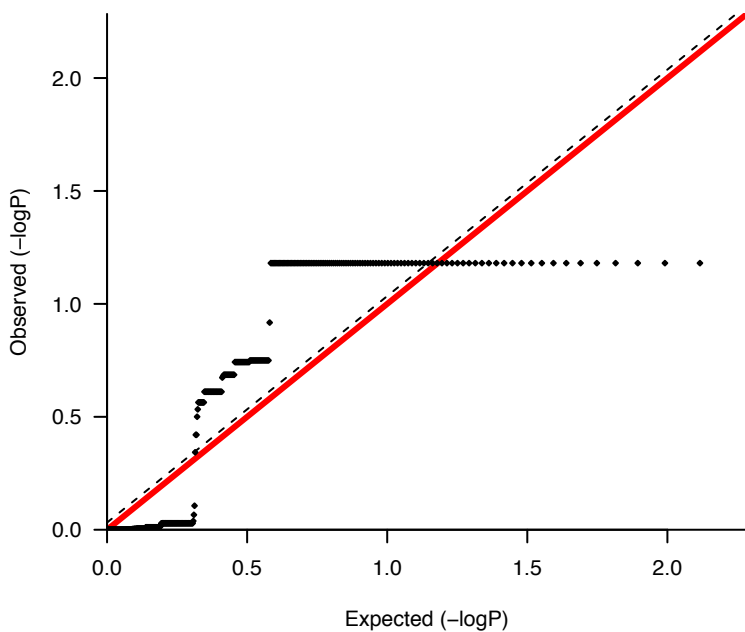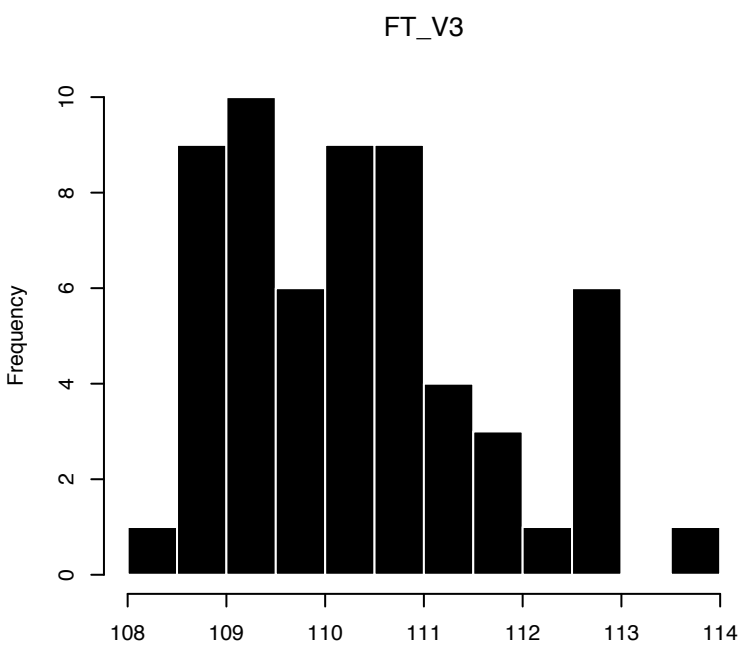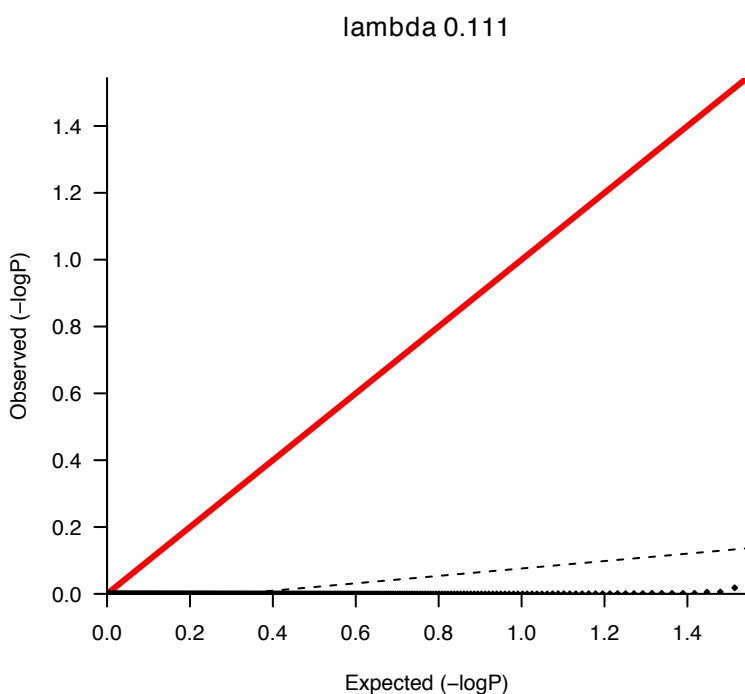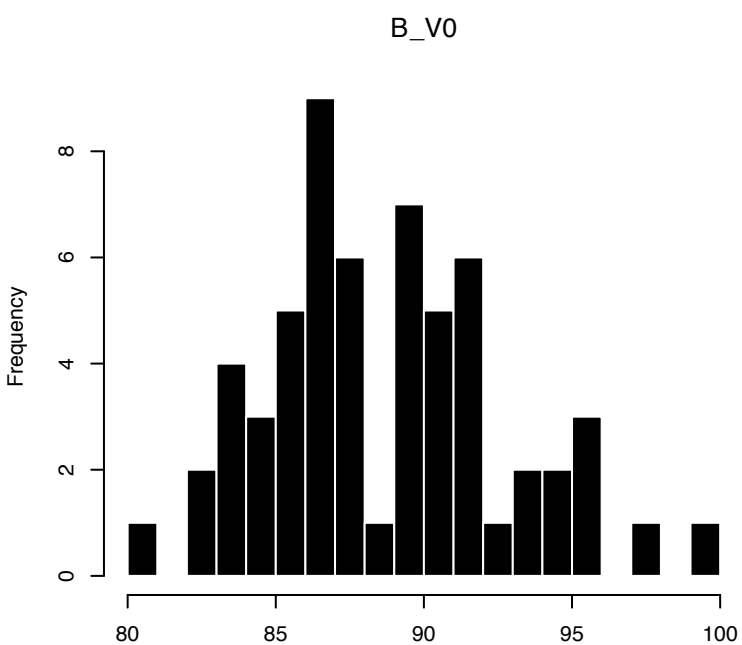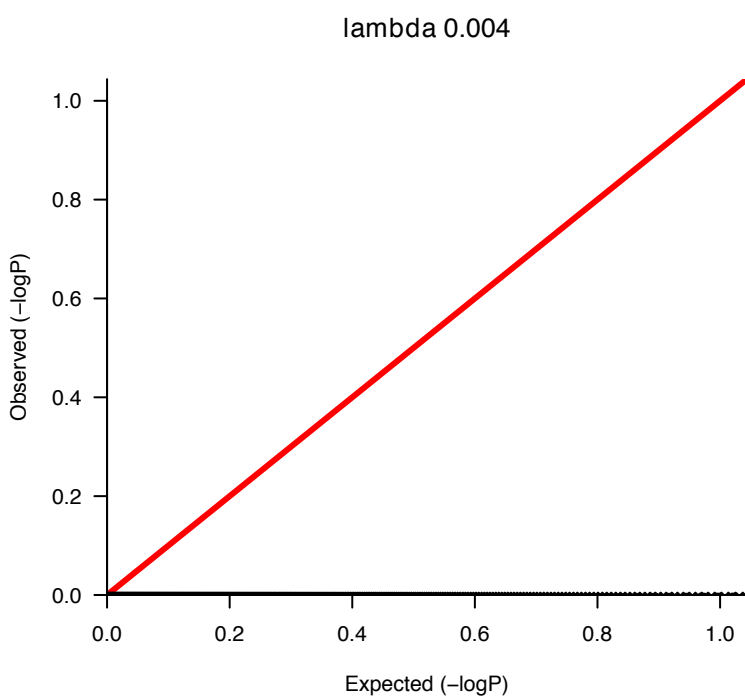

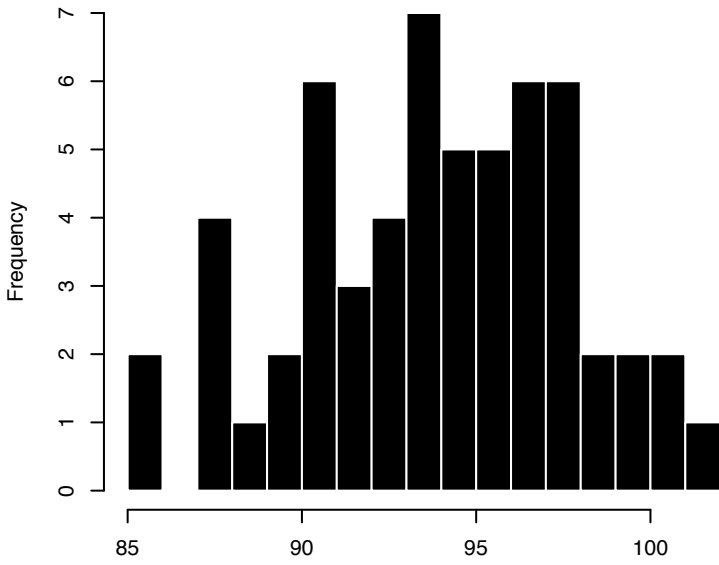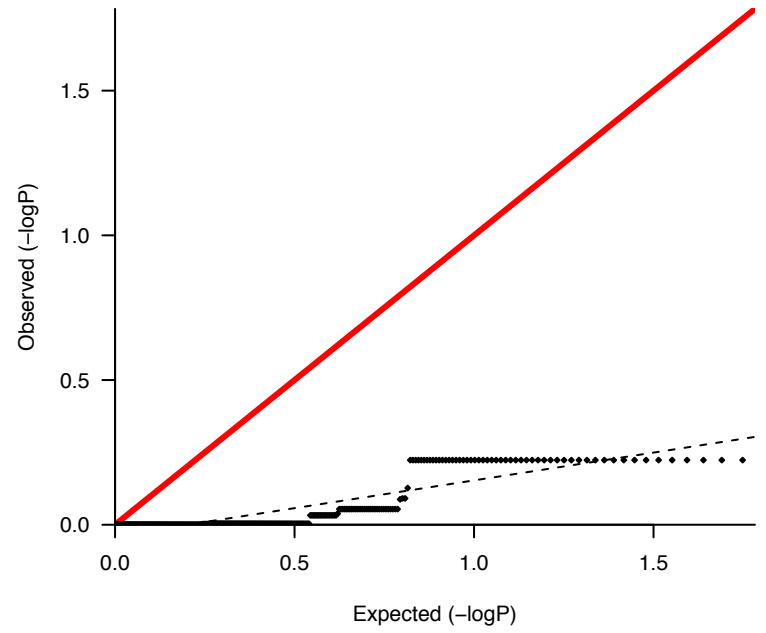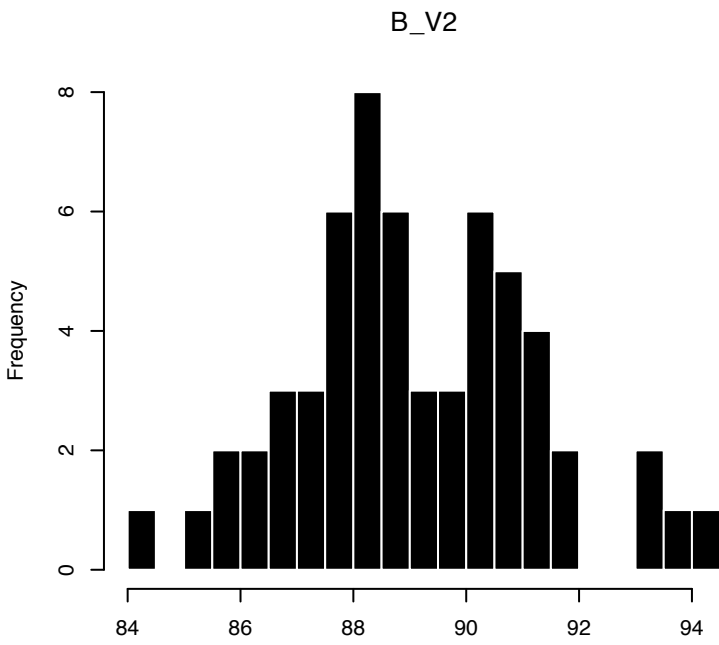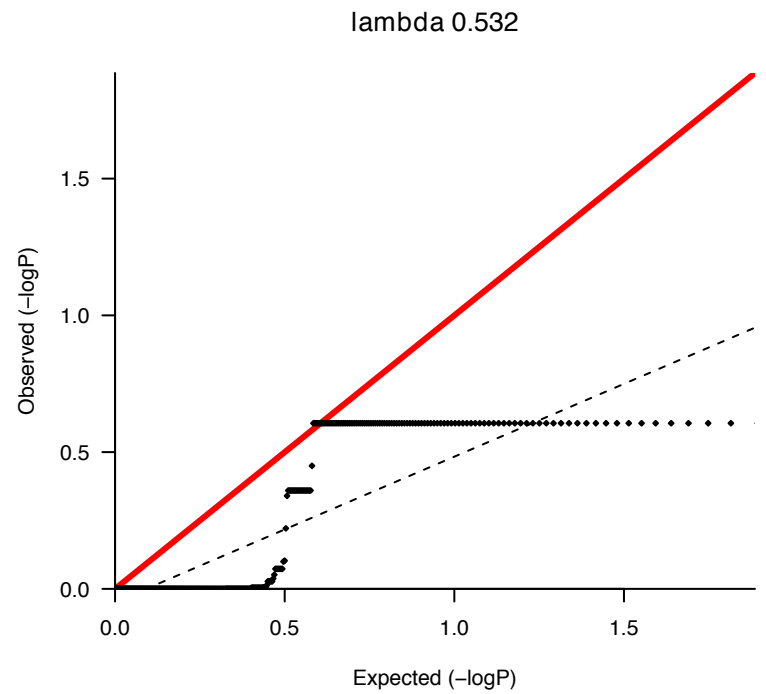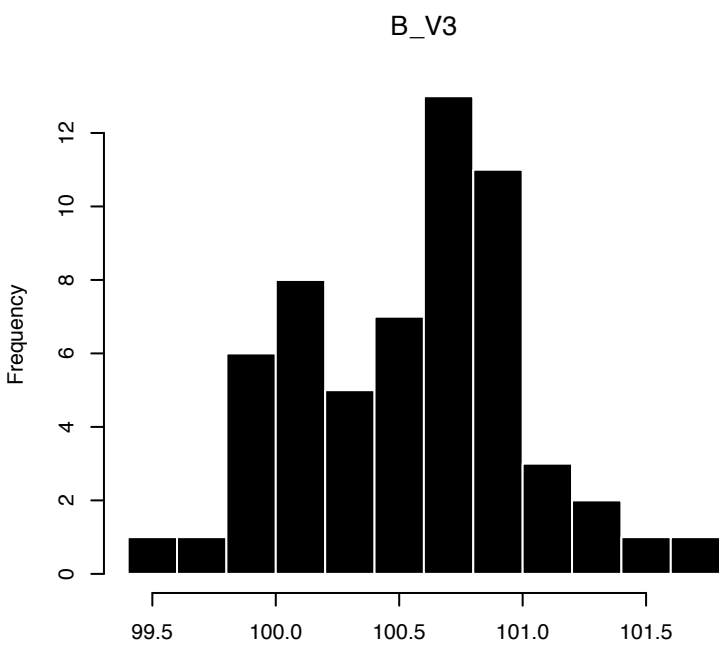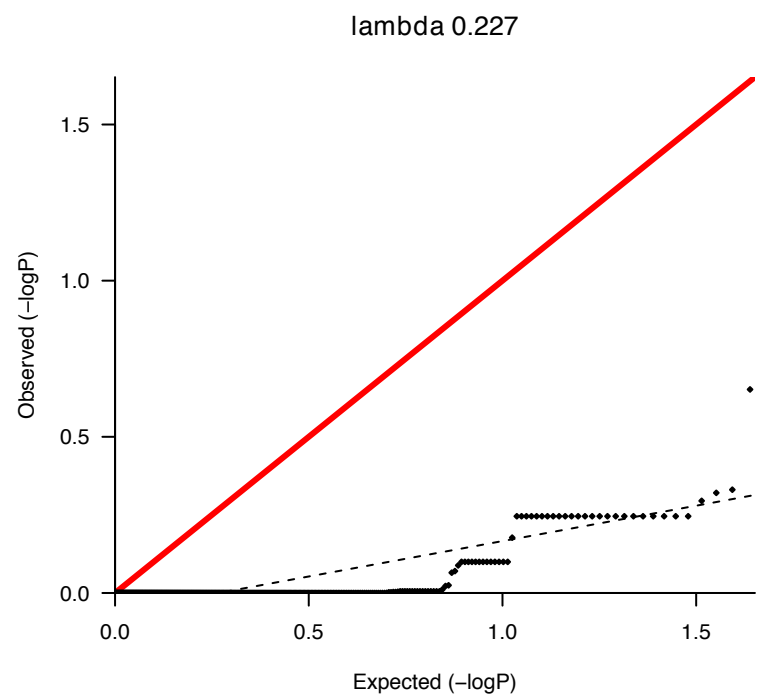

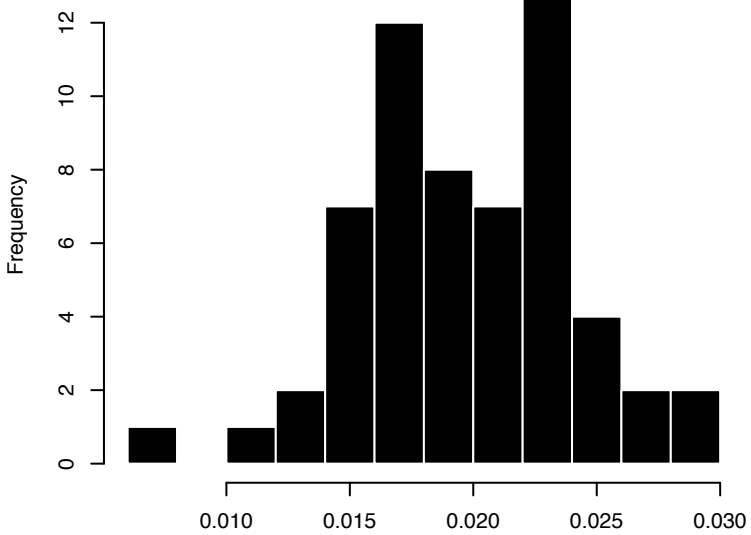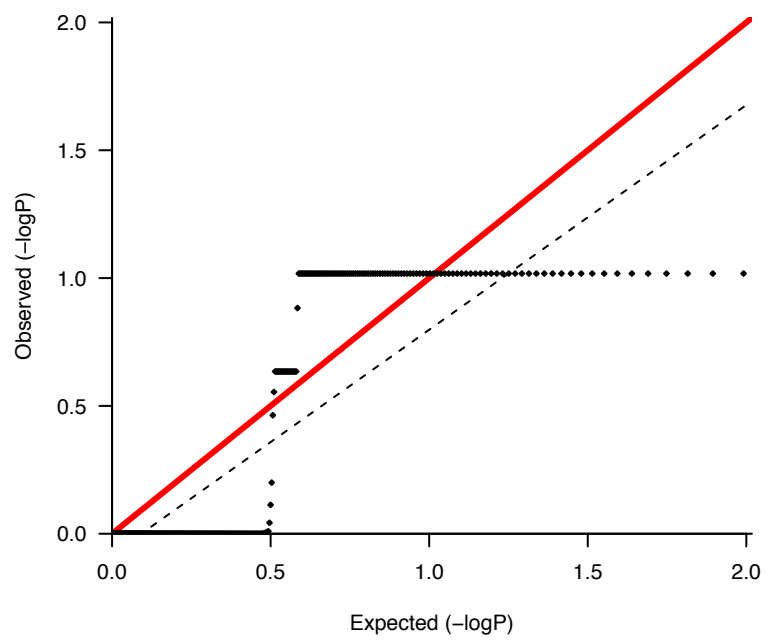

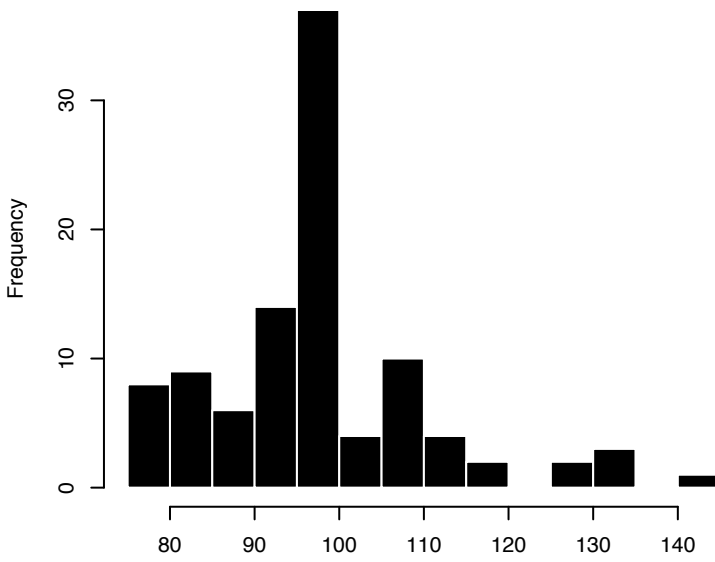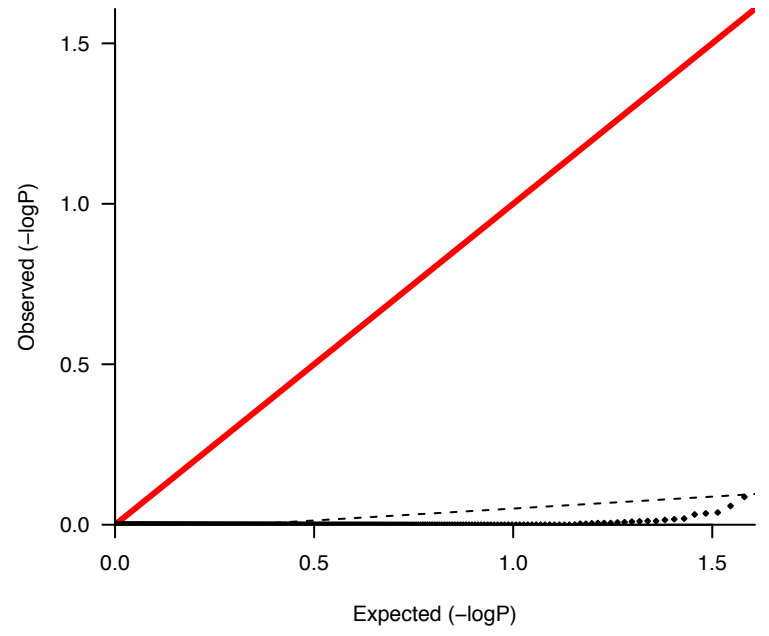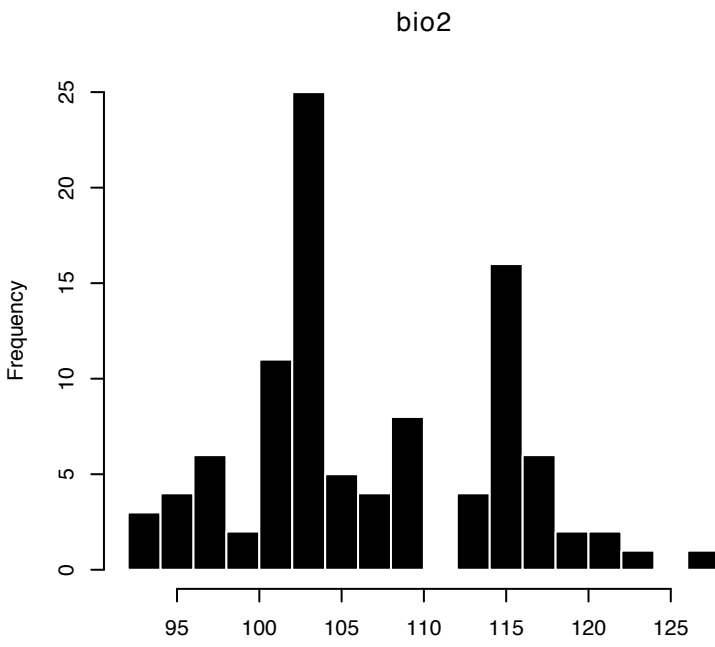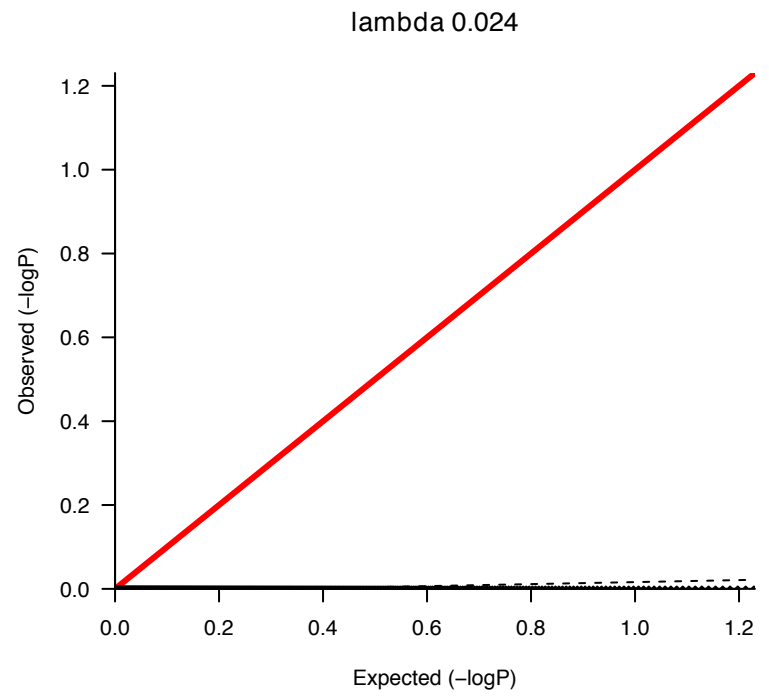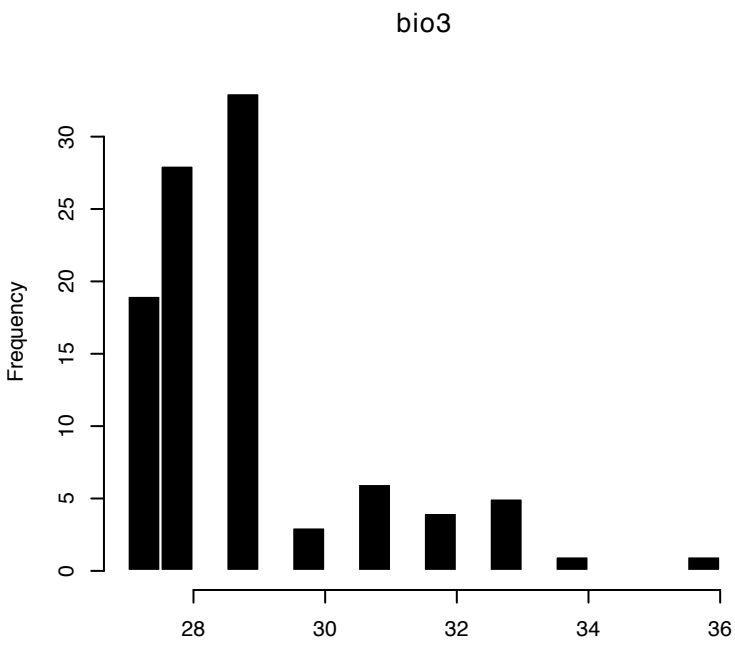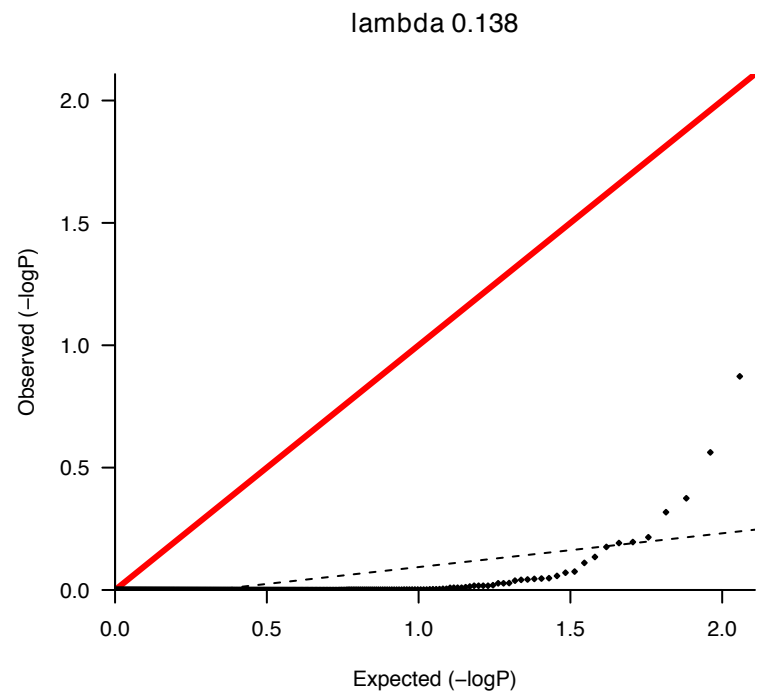

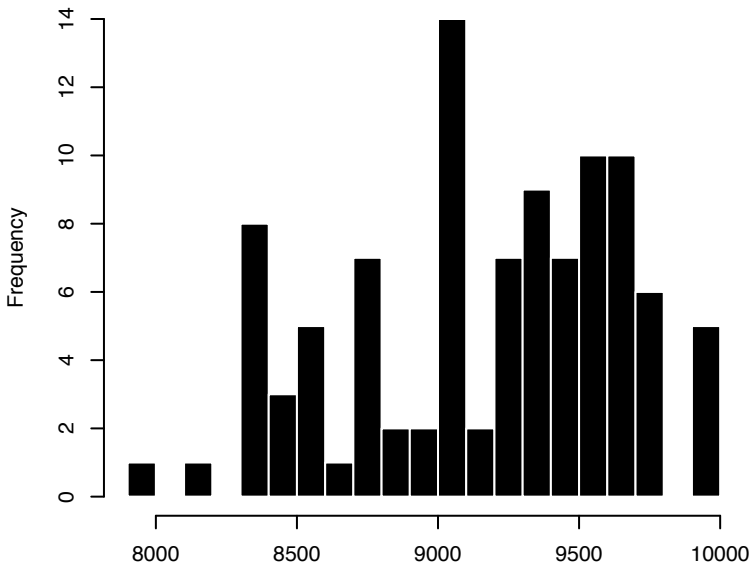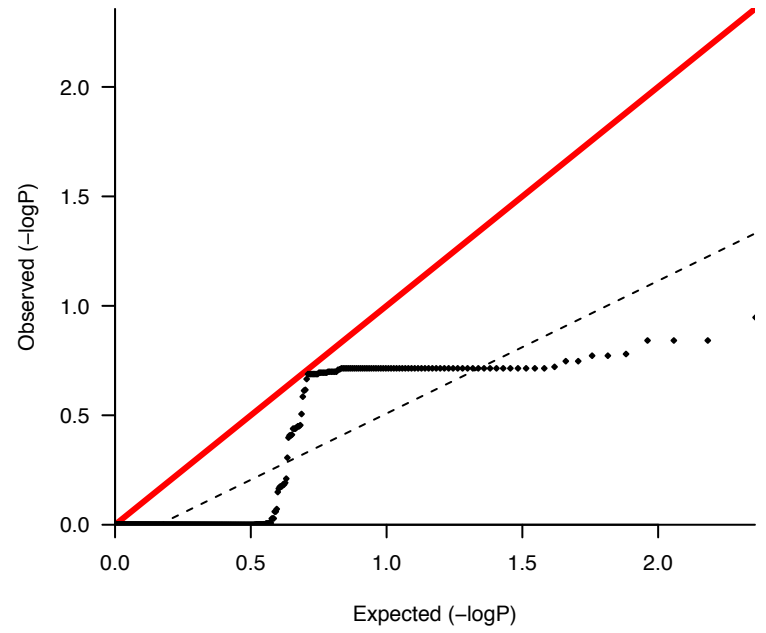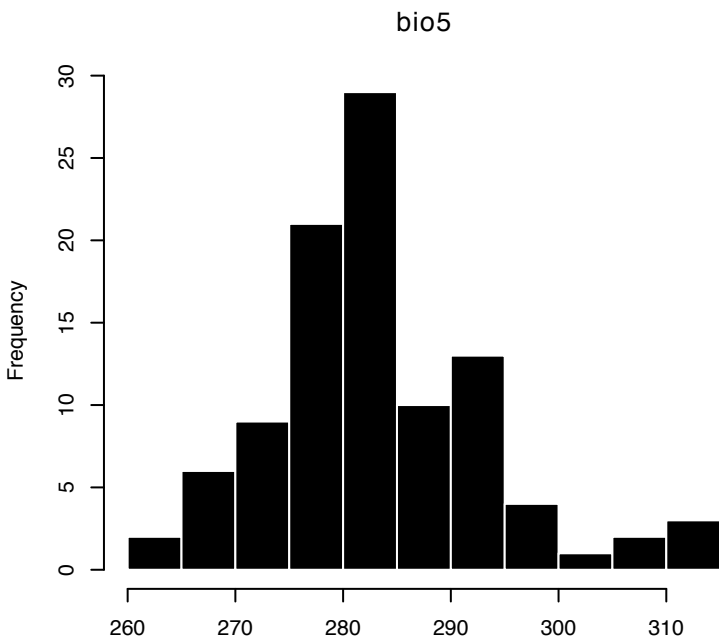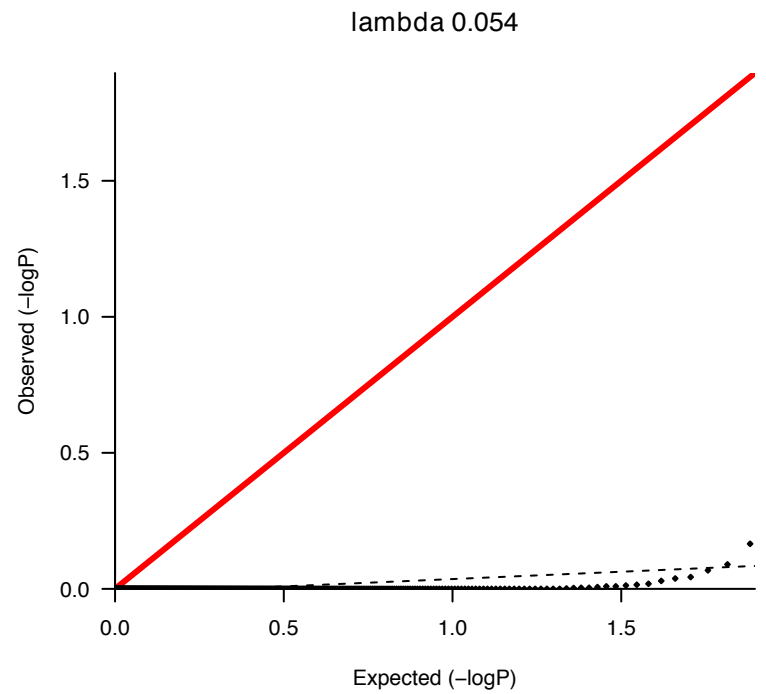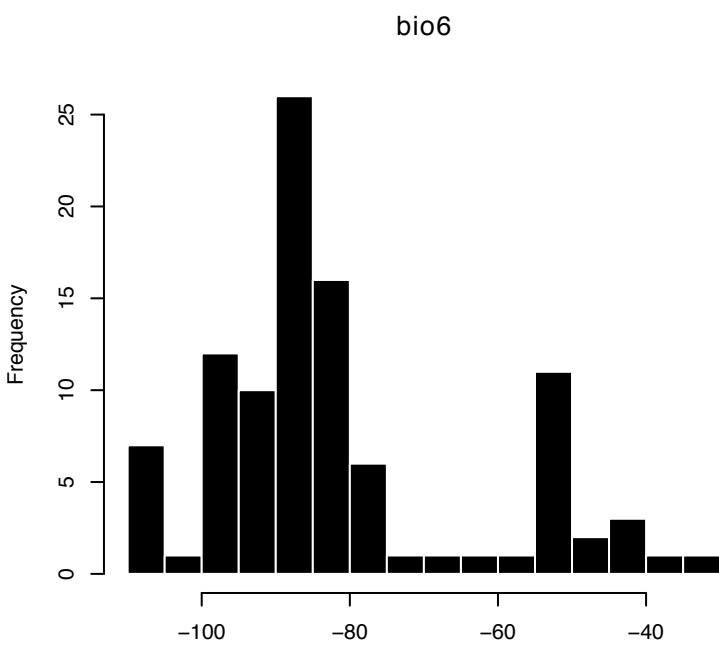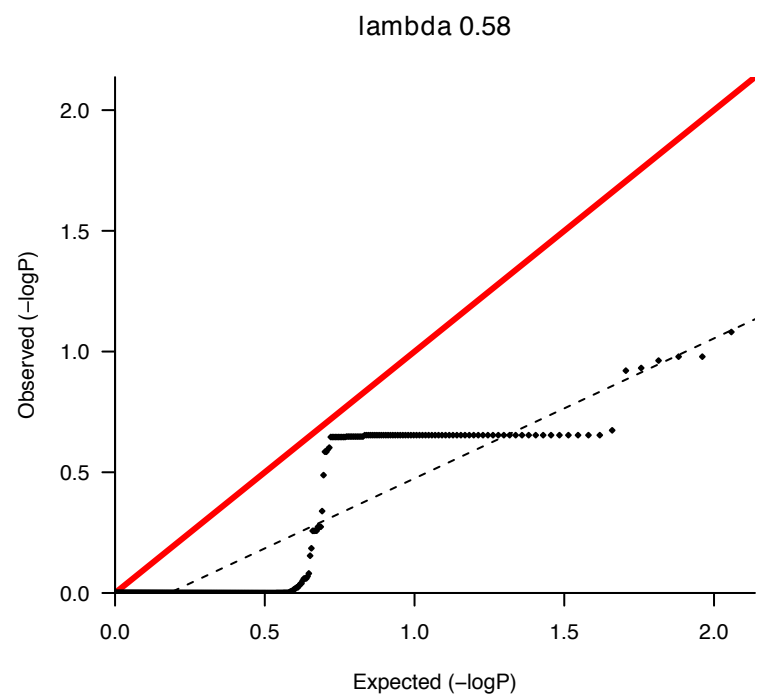

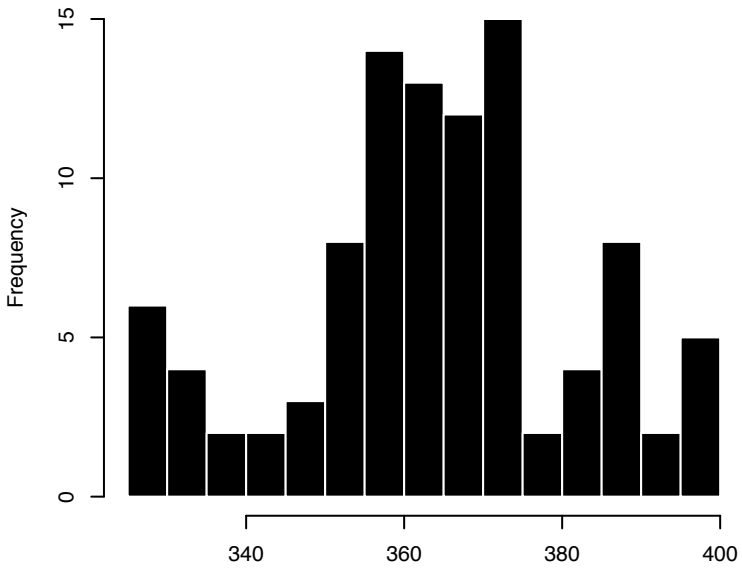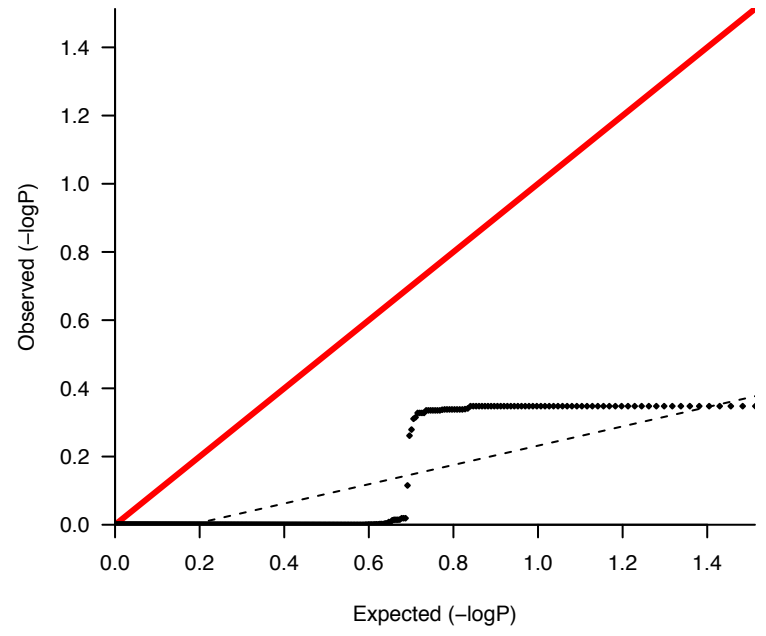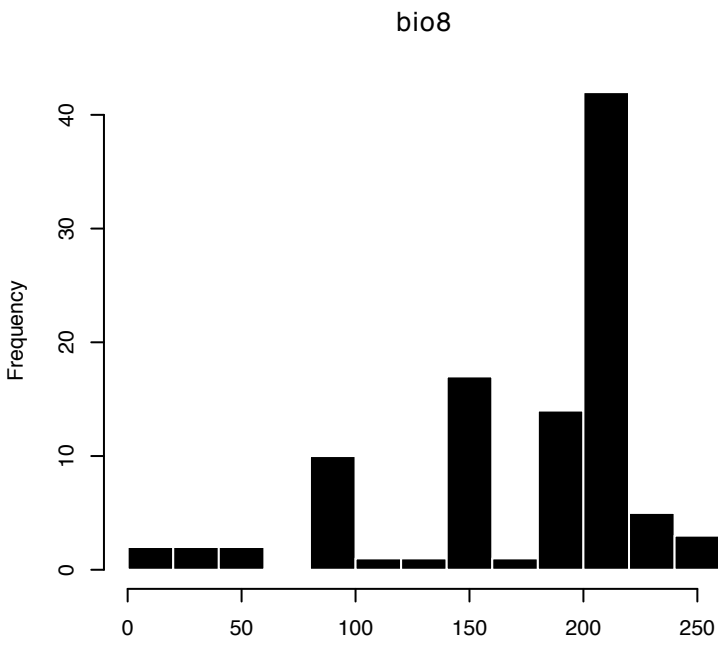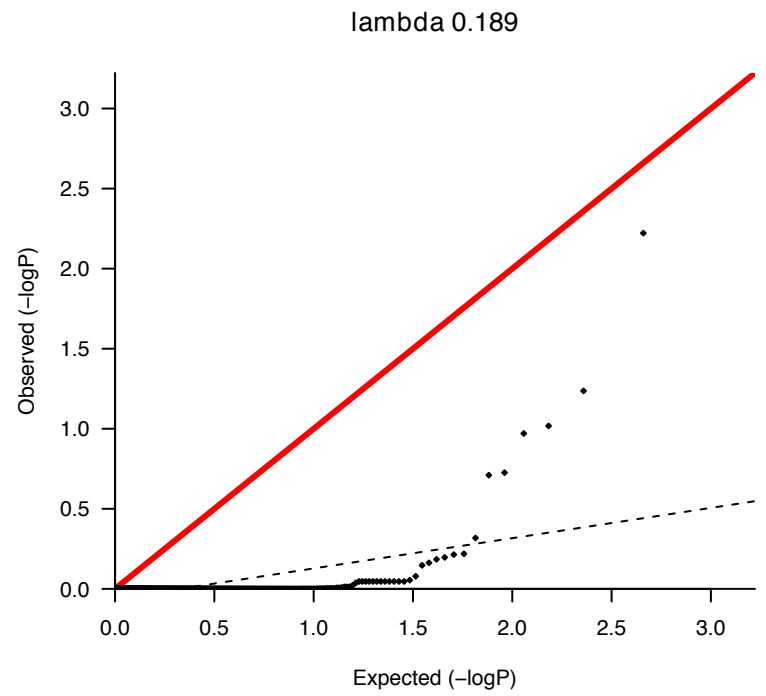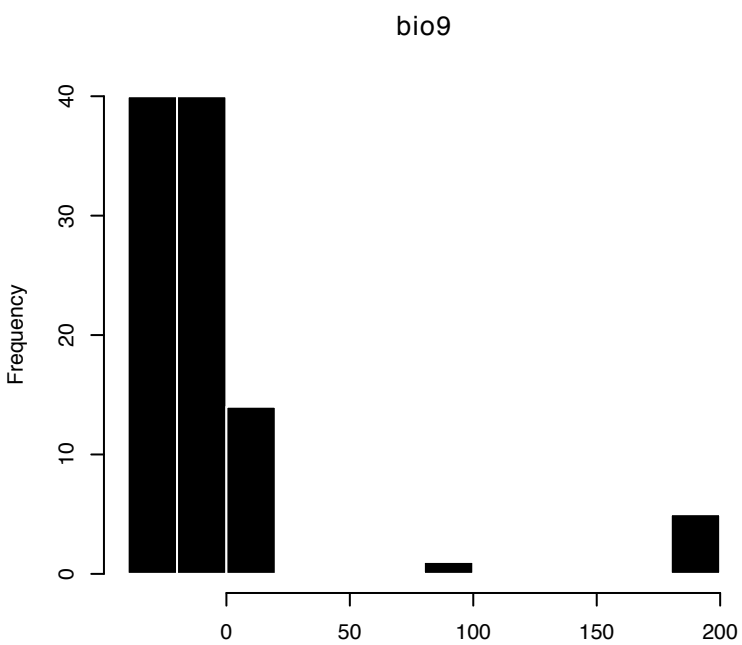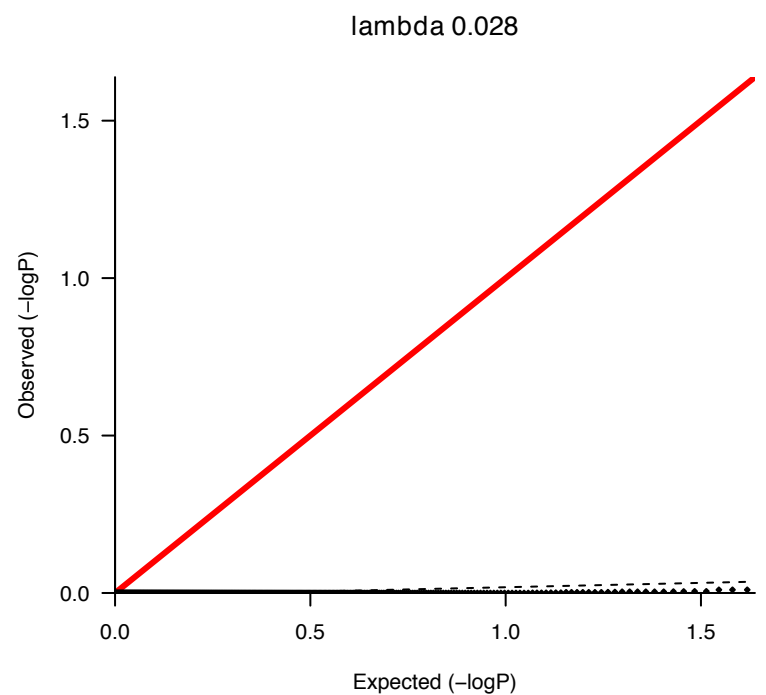

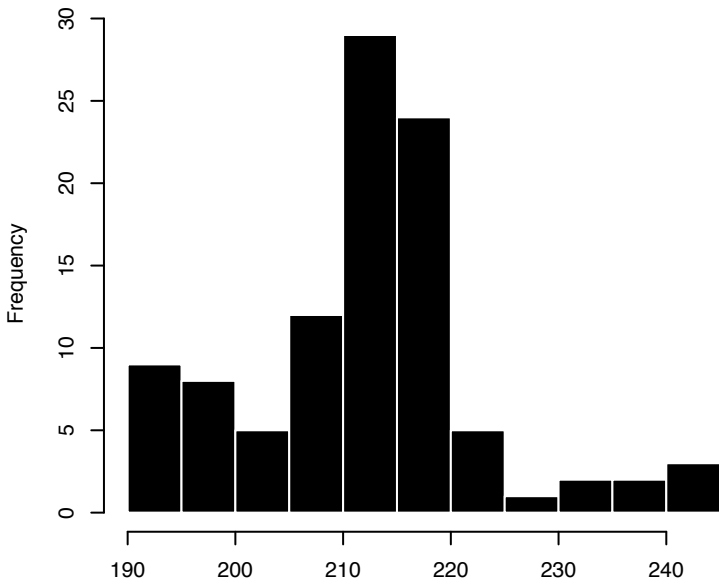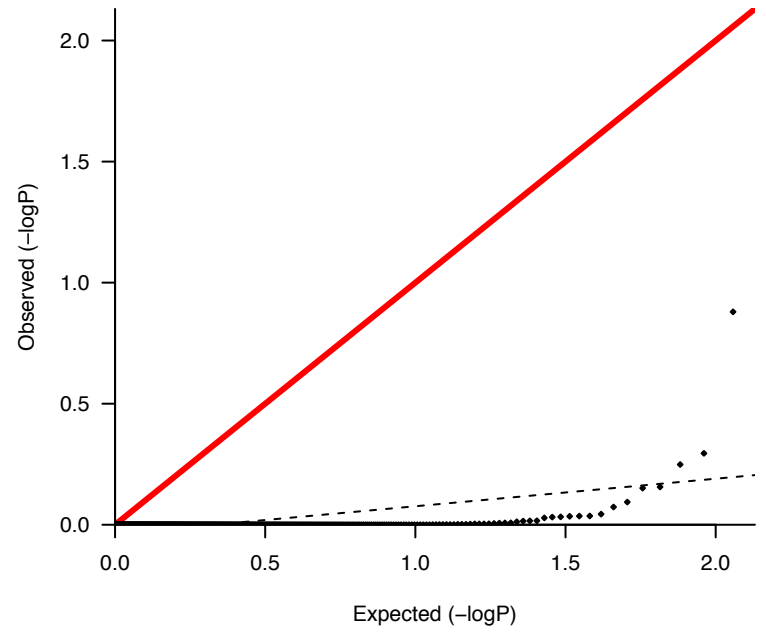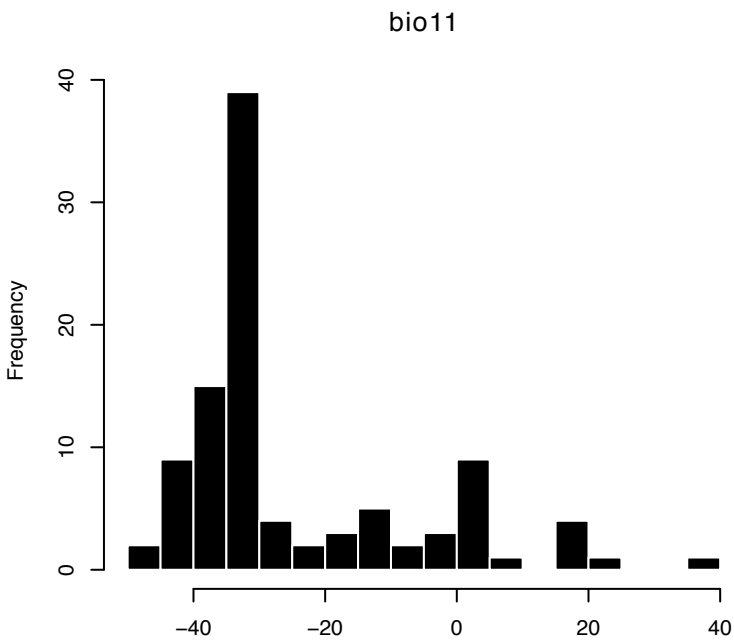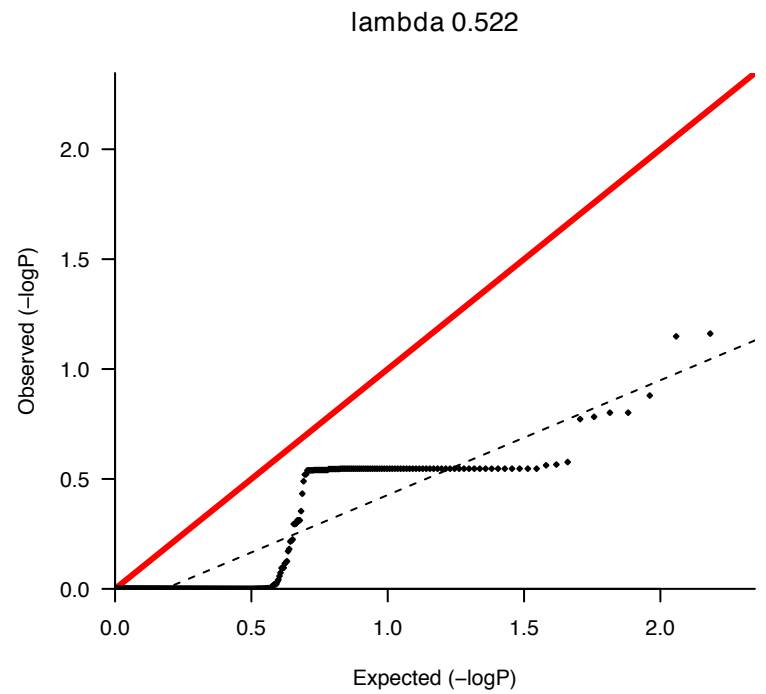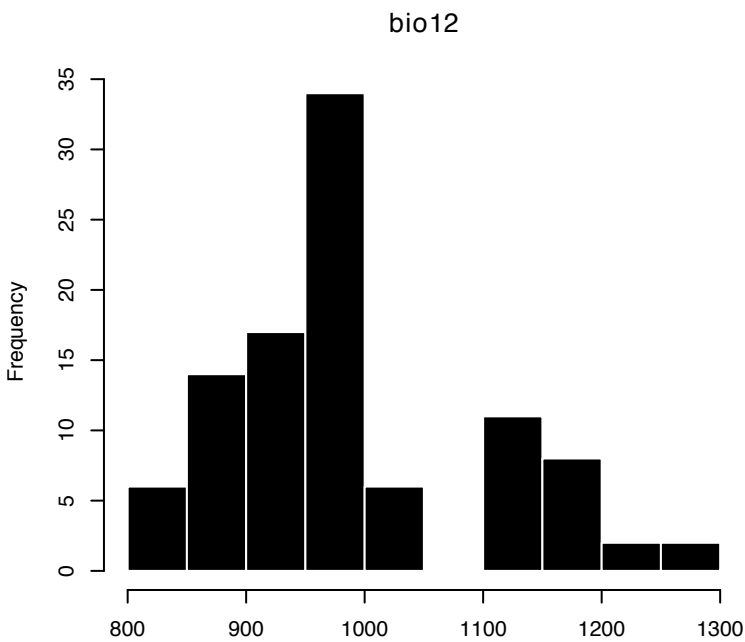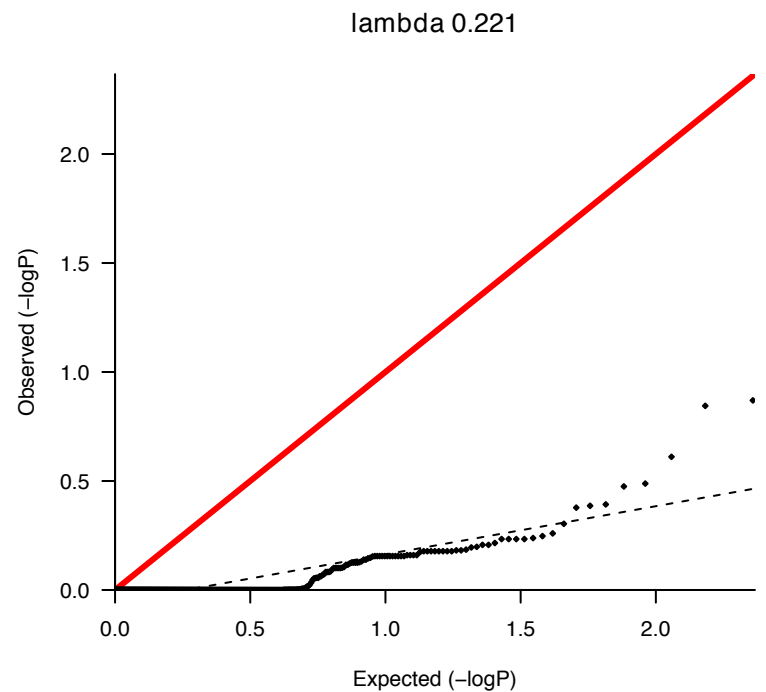

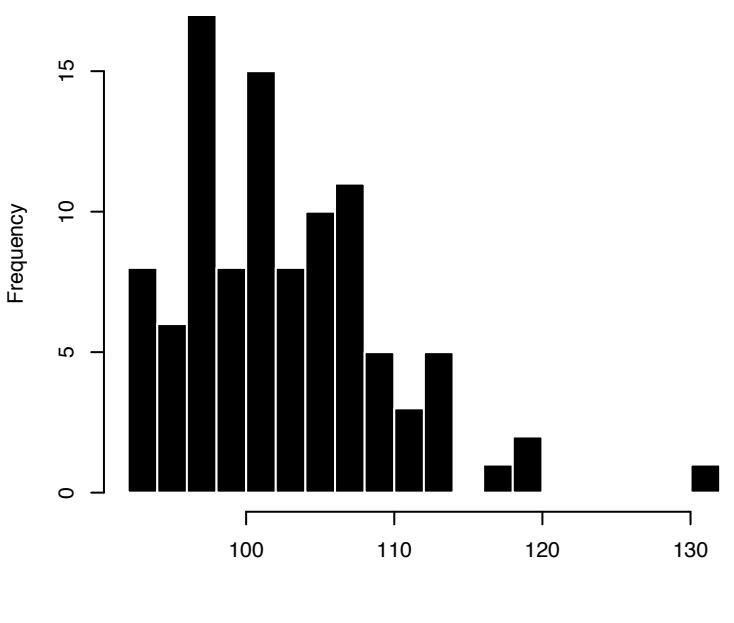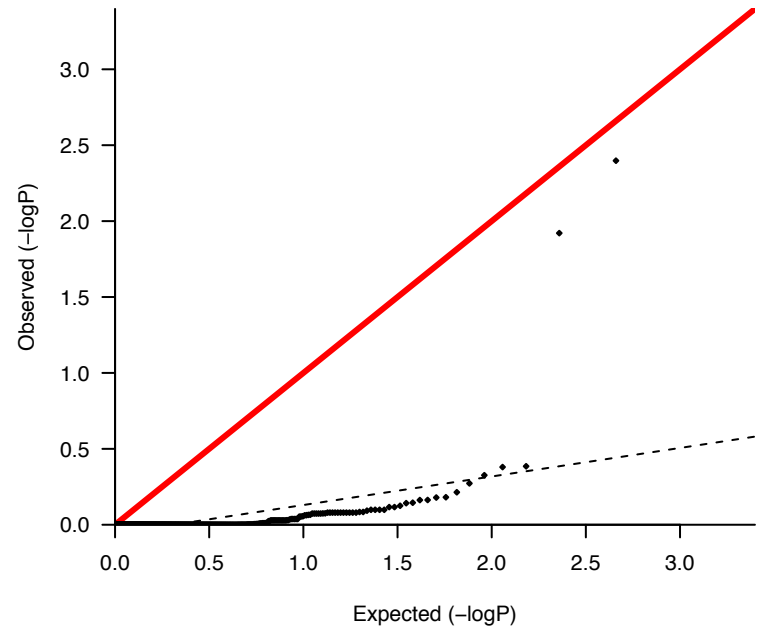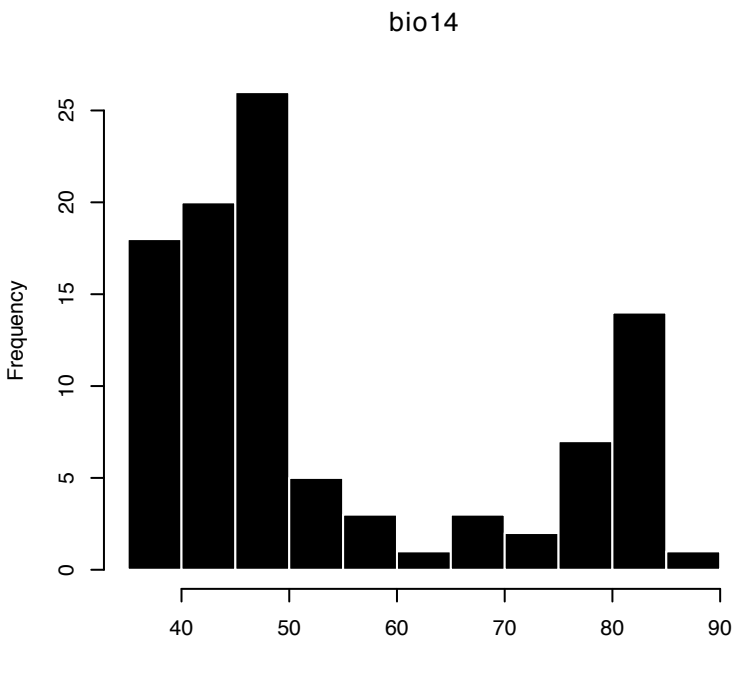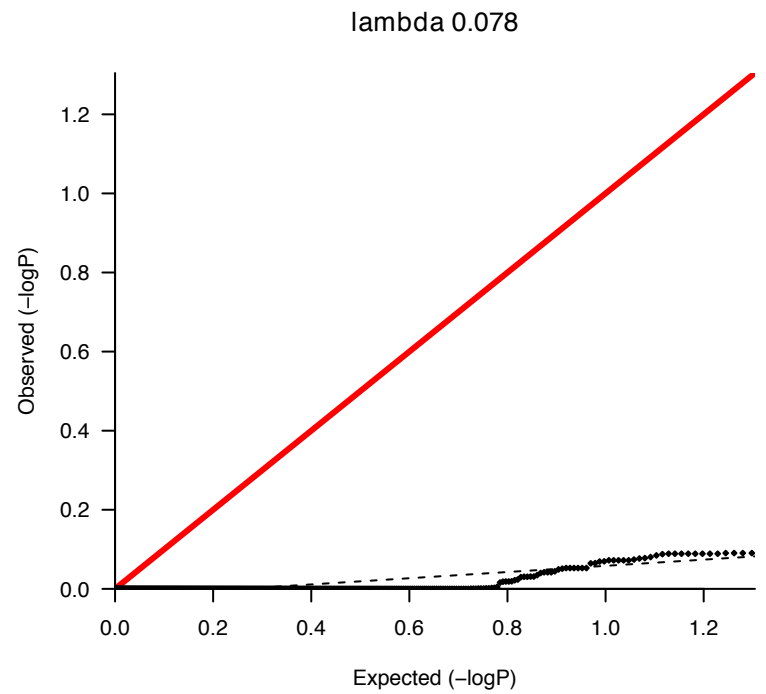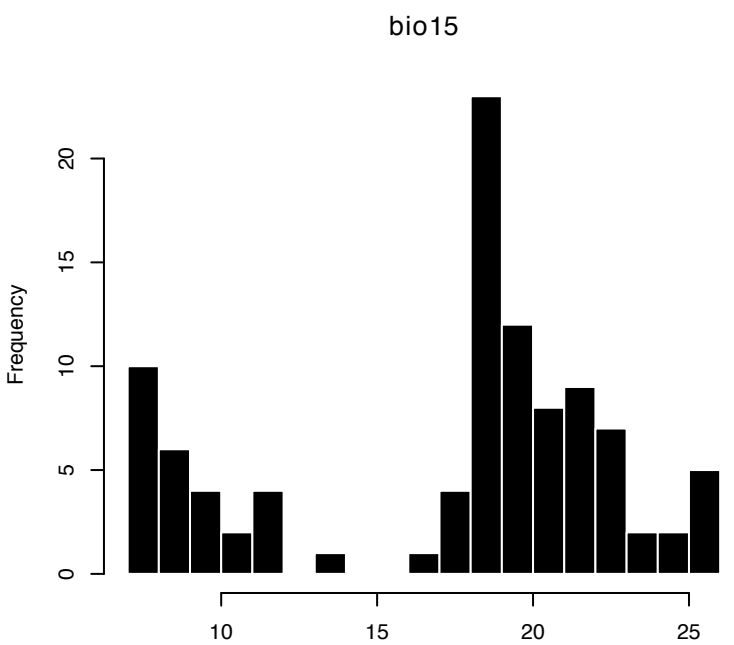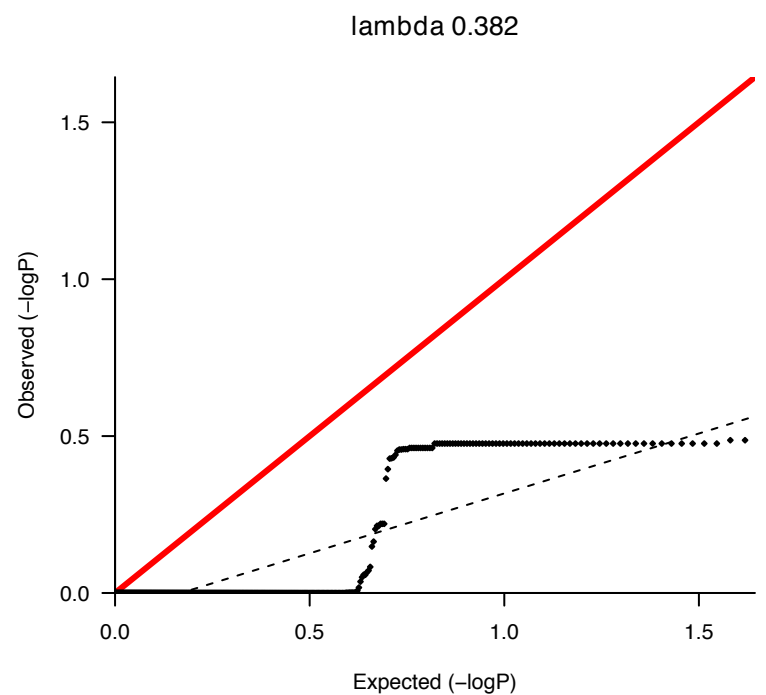



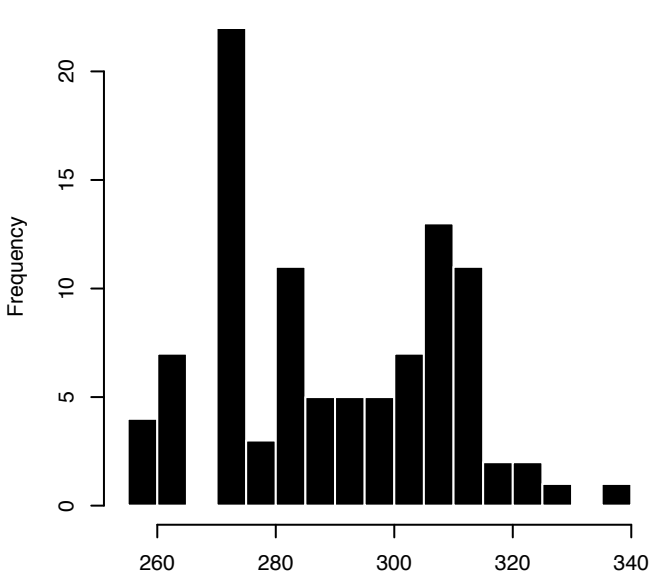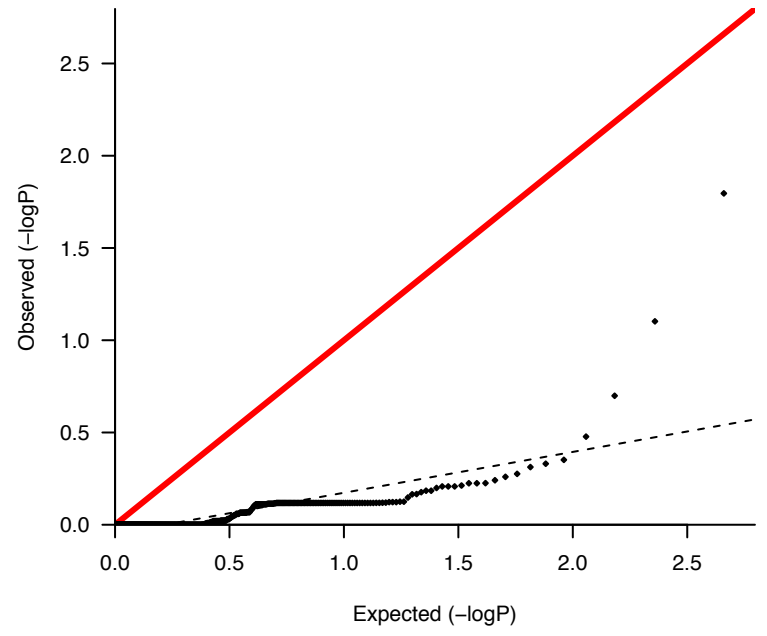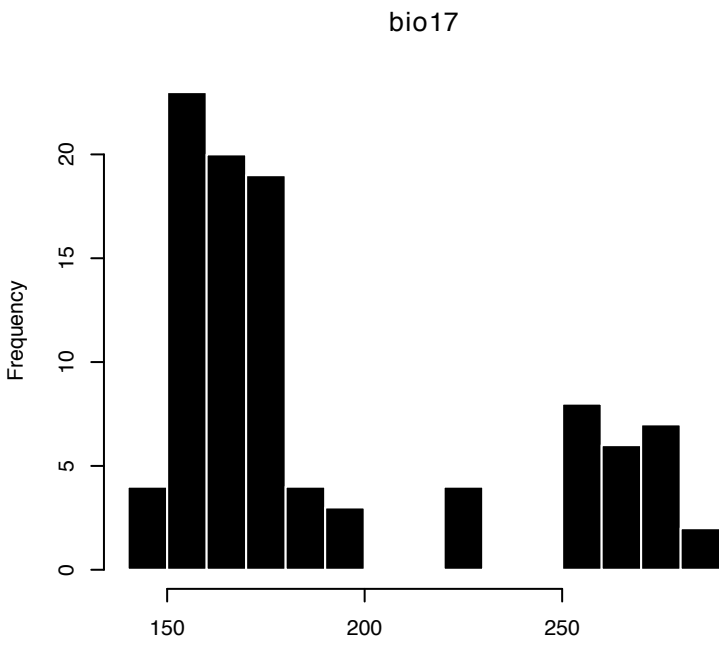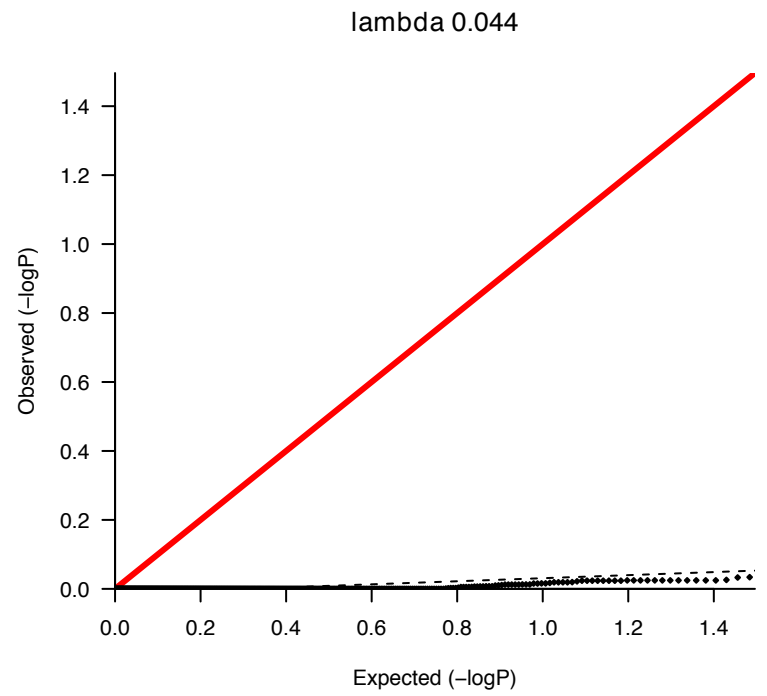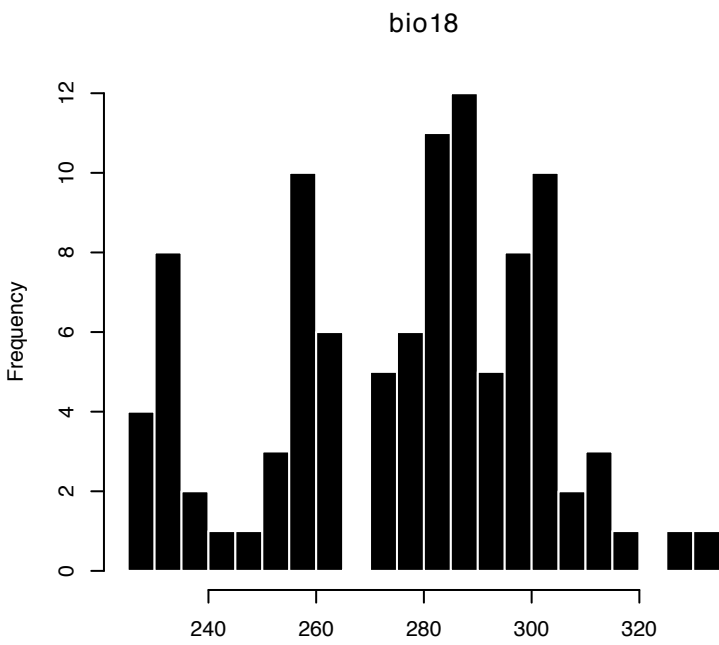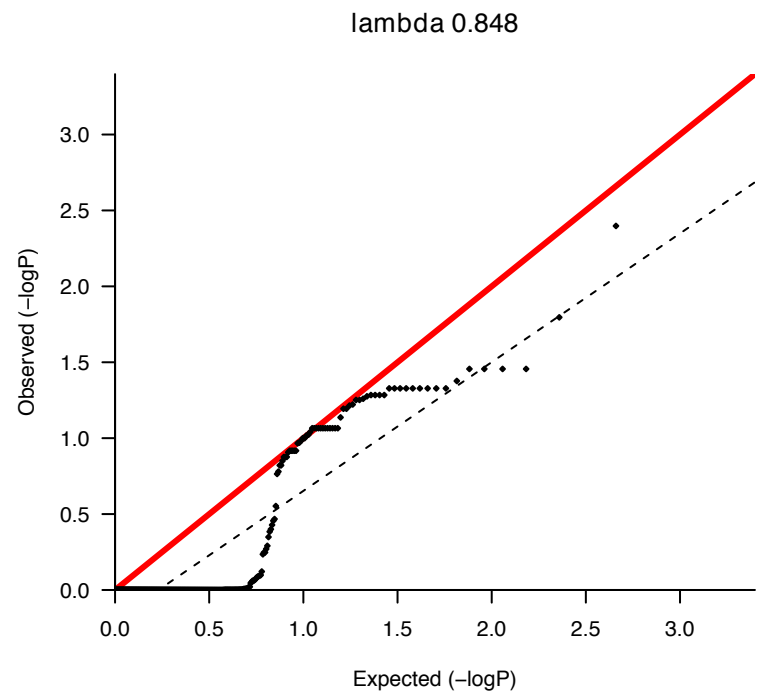

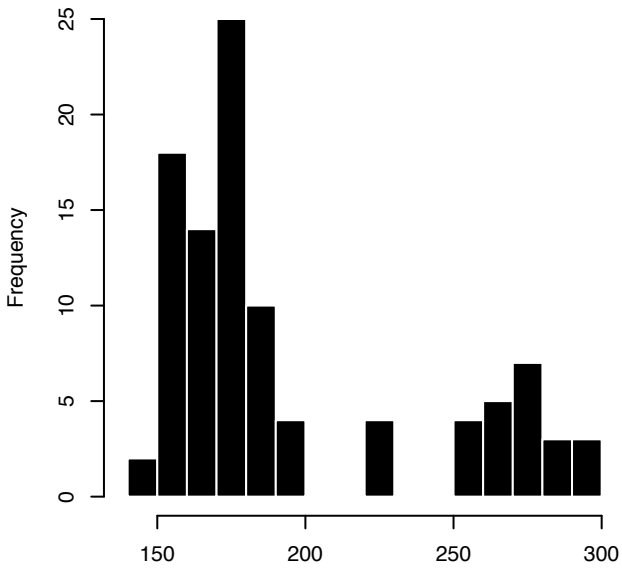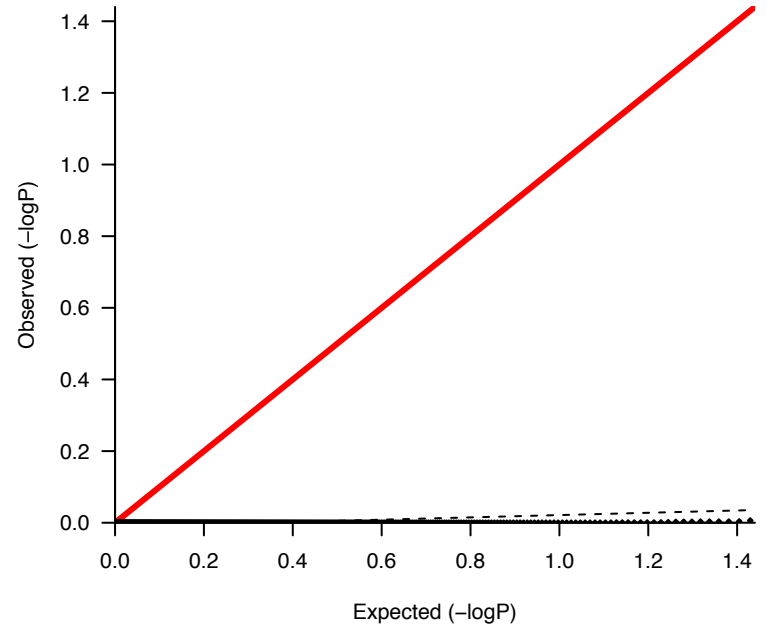

Source: https://www.biorxiv.org/content/biorxiv/early/2016/04/25/050203.full.pdf
